# Supplementary material for: Meta-analysis of biomarkers for severe dengue infections
Source: PeerJ. 2017 Sep 15;5:e3589. doi: 10.7717/peerj.3589 (PMC5602679; doi:10.7717/peerj.3589)
Supplement: Supplemental Information 2 [file peerj-05-3589-s002.xlsx]

## Sheet: 1- study
Biomarkers	Total	Mean difference	Combined std	day	Study Name	Sera/ plasma	WHO classification	DF			DHF/DSS/SD			p-value
								n	es	se	n	es	se
IL-2				1-2	(Kurane et al. 1991)	Sera	DHF/DSS	16	73.5045	89.1623
IL-2	36	-148.494	233.293	3-4	(Kurane et al. 1991)	Sera	DHF/DSS	10	249.811	718.969	26	101.316	266.617	0.846449
IL-2				5-6	(Kurane et al. 1991)	Sera	DHF/DSS				35	71.6377	209.981
IL-2				7-8	(Kurane et al. 1991)	Sera	DHF/DSS				15	21.922	29.939
IL-2	65	-514.23	248.274	10-20	(Kurane et al. 1991)	Sera	DHF/DSS	31	550.628	1379.41	34	36.3974	94.0648	0.709948
IL-2r				1-2	(Kurane et al. 1991)	Sera	DHF/DSS	15	1534.92	1056.43
IL-2r	30	813.681	269.423	3-4	(Kurane et al. 1991)	Sera	DHF/DSS	9	1328.04	379.42	21	2141.72	1090.17	0.480867
IL-2r				5-6	(Kurane et al. 1991)	Sera	DHF/DSS				33	1998.56	971.934
IL-2r				7-8	(Kurane et al. 1991)	Sera	DHF/DSS				15	1660.32	942.915
IL-2r	57	129.101	140.547	10-20	(Kurane et al. 1991)	Sera	DHF/DSS	30	1082.54	468.774	27	1211.64	579.286	0.86246
IFN-g				1-2	(Kurane et al. 1991)	Sera	DHF/DSS	22	2.17764	3.90444
IFN-g	42	2.63253	1.57459	3-4	(Kurane et al. 1991)	Sera	DHF/DSS	18	1.17143	0.737369	24	3.80395	7.66675	0.732508
IFN-g				5-6	(Kurane et al. 1991)	Sera	DHF/DSS				33	0.715549	1.80364
IFN-g				7-8	(Kurane et al. 1991)	Sera	DHF/DSS				18	0.301618	0.623593
IFN-g	68	-0.0495661	0.0391589	10-20	(Kurane et al. 1991)	Sera	DHF/DSS	36	0.177544	0.195858	32	0.127978	0.122357	0.830055
IL-2				1-2	(Kurane et al. 1991)	Sera	DHF	16	73.5045	89.1623
IL-2	14	-115.428	245.24	D -2- -1 (3-4)	(Kurane et al. 1991)	Sera	DHF	10	249.811	718.969	4	134.383	183.857	0.876395
IL-2				D 0-1 (5-6)	(Kurane et al. 1991)	Sera	DHF				25	12.2918	33.6007
IL-2				D 2-3 (7-8)	(Kurane et al. 1991)	Sera	DHF				29	8.44083	7.7953
IL-2				10-20	(Kurane et al. 1991)	Sera	DHF	31	550.628	1379.41
IL-2r				1-2	(Kurane et al. 1991)	Sera	DHF	15	1534.92	1056.43
IL-2r				D -2- -1 (3-4)	(Kurane et al. 1991)	Sera	DHF	9	1328.04	379.42
IL-2r				D 0-1 (5-6)	(Kurane et al. 1991)	Sera	DHF				20	2247.12	393.235
IL-2r				D 2-3 (7-8)	(Kurane et al. 1991)	Sera	DHF				25	2028.9	436.034
IL-2r				10-20	(Kurane et al. 1991)	Sera	DHF	30	1082.54	468.774
IFN-g				1-2	(Kurane et al. 1991)	Sera	DHF	22	2.17764	3.90444
IFN-g	28	2.38398	1.63539	D -2- -1 (3-4)	(Kurane et al. 1991)	Sera	DHF	18	1.17143	0.737369	10	3.55541	5.14228	0.646299
IFN-g				D 0-1 (5-6)	(Kurane et al. 1991)	Sera	DHF				31	0.318315	0.220618
IFN-g				D 2-3 (7-8)	(Kurane et al. 1991)	Sera	DHF				17	0.182587	0.139394
IFN-g				10-20	(Kurane et al. 1991)	Sera	DHF	36	0.177544	0.195858
IL-2				1-2	(Kurane et al. 1991)	Sera	DSS	16	73.5045	89.1623
IL-2	13	-238.488	227.384	D -2- -1 (3-4)	(Kurane et al. 1991)	Sera	DSS	10	249.811	718.969	3	11.323	5.90062	0.740118
IL-2				D 0-1 (5-6)	(Kurane et al. 1991)	Sera	DSS				22	13.7185	11.2025
IL-2				D 2-3 (7-8)	(Kurane et al. 1991)	Sera	DSS				26	14.0077	10.5621
IL-2				10-20	(Kurane et al. 1991)	Sera	DSS	31	550.628	1379.41
IL-2r				1-2	(Kurane et al. 1991)	Sera	DSS	15	1534.92	1056.43
IL-2r				D -2- -1 (3-4)	(Kurane et al. 1991)	Sera	DSS	9	1328.04	379.42
IL-2r				D 0-1 (5-6)	(Kurane et al. 1991)	Sera	DSS				19	2313.04	546.118
IL-2r				D 2-3 (7-8)	(Kurane et al. 1991)	Sera	DSS				23	2081.96	393.242
IL-2r				10-20	(Kurane et al. 1991)	Sera	DSS	30	1082.54	468.774
IFN-g				1-2	(Kurane et al. 1991)	Sera	DSS	22	2.17764	3.90444
IFN-g	21	10.1516	3.41115	D -2- -1 (3-4)	(Kurane et al. 1991)	Sera	DSS	18	1.17143	0.737369	3	11.323	5.90062	0.0877951
IFN-g				D 0-1 (5-6)	(Kurane et al. 1991)	Sera	DSS				20	0.284384	0.173262
IFN-g				D 2-3 (7-8)	(Kurane et al. 1991)	Sera	DSS				23	0.142734	0.0417283
IFN-g				10-20	(Kurane et al. 1991)	Sera	DSS	36	0.177544	0.195858
TNF-a	24	293521	109760	NA	(Yadav et al. 1991)	Sera	DHF/DSS	8	13031.9	9607.71	16	306553	438828	0.503678
TNF-a	22	-12837.3	3397.99	NA	(Yadav et al. 1991)	Sera	DHF	8	13031.9	9607.71	14	194.662	330.575	0.181762
TNF-a	10	-11942.1	3401.67	NA	(Yadav et al. 1991)	Sera	DSS	8	13031.9	9607.71	2	1089.79	256.357	0.214041
IFN-a2				1	(Kurane et al. 1993)	Sera	DHF/DSS	4	24.36	34.8349
IFN-a2	7	8.25251	11.186	2	(Kurane et al. 1993)	Sera	DHF/DSS	4	7.05643	10.8581	3	15.3089	16.9397	0.681699
IFN-a2	18	9.25691	12.3572	3	(Kurane et al. 1993)	Sera	DHF/DSS	6	15.0106	13.4675	12	24.2675	38.3362	0.819788
IFN-a2	25	9.10265	4.62294	4	(Kurane et al. 1993)	Sera	DHF/DSS	5	0.957982	0.0931527	20	10.0606	20.6736	0.659721
IFN-a2	26	2.91435	4.12822	5	(Kurane et al. 1993)	Sera	DHF/DSS	4	3.62067	5.2988	22	6.53503	14.8494	0.85335
IFN-a2	36	20.1117	10.0565	6-7	(Kurane et al. 1993)	Sera	DHF/DSS	4	0.974989	0.0981916	32	21.0867	56.8877	0.723689
IFN-a2	27	17.2399	7.05747	10-20	(Kurane et al. 1993)	Sera	DHF/DSS	4	2.0135	1.17029	23	19.2534	33.7299	0.609486
IFN-a2	11	-45.1909	28.6178	D -1 (4)	(Kurane et al. 1993)	Sera	DHF	2	50.1584	40.2579	9	4.96748	8.81441	0.272834
IFN-a2	14	-7.58313	6.85668	D 0 (5)	(Kurane et al. 1993)	Sera	DHF	6	11.7728	15.6924	8	4.18964	6.91209	0.658319
IFN-a2	24	-4.4107	4.39012	D 1 (6)	(Kurane et al. 1993)	Sera	DHF	6	9.28592	10.349	18	4.87522	5.06076	0.701816
IFN-a2	14	2.77022	2.70631	D 2 (7)	(Kurane et al. 1993)	Sera	DHF	4	1.02472	0.0673552	10	3.79494	8.55744	0.746157
IFN-a2	8	-0.369795	8.26057	D 3 (8)	(Kurane et al. 1993)	Sera	DHF	3	4.67202	6.34027	5	4.30223	16.5586	0.983361
IFN-a2				D 4 (9)	(Kurane et al. 1993)	Sera	DHF	3	1.01533	0.00669366
IFN-a2				D 7-9 (12-14)	(Kurane et al. 1993)	Sera	DHF				8	4.37118	7.27323
IFN-a2				15-18	(Kurane et al. 1993)	Sera	DHF	4	2.02177	1.15322
IFN-a2	6	-46.0266	28.6607	D -1 (4)	(Kurane et al. 1993)	Sera	DSS	2	50.1584	40.2579	4	4.13183	6.65892	0.259334
IFN-a2	12	-8.07298	6.57286	D 0 (5)	(Kurane et al. 1993)	Sera	DSS	6	11.7728	15.6924	6	3.69979	3.60042	0.616074
IFN-a2	15	-5.94468	4.26587	D 1 (6)	(Kurane et al. 1993)	Sera	DSS	6	9.28592	10.349	9	3.34124	1.76824	0.571247
IFN-a2	14	2.07057	0.363074	D 2 (7)	(Kurane et al. 1993)	Sera	DSS	4	1.02472	0.0673552	10	3.09528	1.14319	0.0705941
IFN-a2	9	-2.93495	3.67623	D 3 (8)	(Kurane et al. 1993)	Sera	DSS	3	4.67202	6.34027	6	1.73707	0.830567	0.646245
IFN-a2				D 4 (9)	(Kurane et al. 1993)	Sera	DSS	3	1.01533	0.00669366
IFN-a2				D 7-9 (12-14)	(Kurane et al. 1993)	Sera	DSS				8	4.89704	4.05423
IFN-a2				15-18	(Kurane et al. 1993)	Sera	DSS	4	2.02177	1.15322
TGF-b	9	225	112.599	1-4	(Agarwal et al. 1999)	Sera	DHF/DSS	7	225	100	2	450	150	0.212003
TGF-b	17	790	133.673	5-9	(Agarwal et al. 1999)	Sera	DHF/DSS	10	650	180	7	1440	320	0.0314208
TGF-b	22	960	55.6883	9-18	(Agarwal et al. 1999)	Sera	DHF/DSS	1	90	30	21	1050	215	9.76679e-06
IL-2r	16	388.889	176.728	2	(Sharone Green et al. 1999)	Plasma	DHF/DSS	7	1117.65	127.073	9	1506.54	510.228	0.46
IL-2r	28	385.813	285.543	3	(Sharone Green et al. 1999)	Plasma	DHF/DSS	11	1529.41	807.727	17	1915.22	614.653	0.704
IL-2r	36	349.3	203.813	4	(Sharone Green et al. 1999)	Plasma	DHF/DSS	15	1605.88	581.559	21	1955.18	631.54	0.684
IL-2r	37	242.781	227.337	5	(Sharone Green et al. 1999)	Plasma	DHF/DSS	15	1917.65	718.222	22	2160.43	616.795	0.798
IL-2r	20	847.123	217.507	6	(Sharone Green et al. 1999)	Plasma	DHF/DSS	7	1512.61	374.296	13	2359.73	595.682	0.229
IL-2r	28	161.893	191.783	13-18	(Sharone Green et al. 1999)	Plasma	DHF/DSS	5	1435.29	336.89	23	1597.19	569.103	0.807
sTNF-R1	29	165.079	82.6308	3	(Sharone Green et al. 1999)	Plasma	DHF/DSS	15	155.556	128.208	14	320.635	283.282	0.595
sTNF-R1	38	105.802	56.1199	4	(Sharone Green et al. 1999)	Plasma	DHF/DSS	18	197.531	147.34	20	303.333	197.149	0.667
sTNF-R1	37	68.8326	57.6186	5	(Sharone Green et al. 1999)	Plasma	DHF/DSS	19	187.135	203.892	18	255.967	142.738	0.782
sTNF-R1	28	59.7911	43.384	6	(Sharone Green et al. 1999)	Plasma	DHF/DSS	15	84.9383	116.715	13	144.729	112.527	0.712
sTNF-R1	26	49.03	51.6817	13-18	(Sharone Green et al. 1999)	Plasma	DHF/DSS	12	45.679	67.0645	14	94.709	179.295	0.798
sTNF-R2	30	921.212	287.923	3	(Sharone Green et al. 1999)	Plasma	DHF/DSS	15	1323.23	348.845	15	2244.44	1059.15	0.409
sTNF-R2	36	812.459	305.788	4	(Sharone Green et al. 1999)	Plasma	DHF/DSS	17	1857.4	583.359	19	2669.86	1181.64	0.538
sTNF-R2	38	928.125	295.356	5	(Sharone Green et al. 1999)	Plasma	DHF/DSS	20	2150	568.643	18	3078.12	1131.02	0.463
sTNF-R2	30	601.402	317.887	6	(Sharone Green et al. 1999)	Plasma	DHF/DSS	16	1876.95	479.321	14	2478.35	1101.68	0.617
sTNF-R2	25	321.023	233.182	13-18	(Sharone Green et al. 1999)	Plasma	DHF/DSS	11	906.25	354.105	14	1227.27	775.658	0.707
IL-10	15	20.1852	21.4141	D -3 (2)	(S Green et al. 1999)	Plasma	DHF/DSS	6	37.7778	30.4534	9	57.963	52.3064	0.738759
IL-10	26	74.2308	31.1391	D -2 (3)	(S Green et al. 1999)	Plasma	DHF/DSS	13	32.4359	24.311	13	106.667	109.61	0.50851
IL-10	35	76.6389	31.4689	D -1 (4)	(S Green et al. 1999)	Plasma	DHF/DSS	15	56.7778	48.8294	20	133.417	128.945	0.578324
IL-10	37	53.7817	27.7948	D 0 (5)	(S Green et al. 1999)	Plasma	DHF/DSS	19	89.7368	82.657	18	143.519	86.2166	0.652502
IL-10	29	17.9739	9.66149	D 1 (6)	(S Green et al. 1999)	Plasma	DHF/DSS	17	39.8039	16.4135	12	57.7778	30.4953	0.603763
IL-12	15	-154.005	139.284	D -3 (2)	(S Green et al. 1999)	Plasma	DHF/DSS	6	750.388	301.583	9	596.382	195.373	0.668228
IL-12	28	-195.587	84.659	D -2 (3)	(S Green et al. 1999)	Plasma	DHF/DSS	13	727.37	236.734	15	531.783	206.984	0.533956
IL-12	34	-225.312	69.2255	D -1 (4)	(S Green et al. 1999)	Plasma	DHF/DSS	15	737.674	219.949	19	512.362	172.548	0.42026
IL-12	35	-200.775	65.4868	D 0 (5)	(S Green et al. 1999)	Plasma	DHF/DSS	20	646.047	239.295	15	445.271	146.224	0.474026
IL-12	31	-158.14	63.5192	D 1 (6)	(S Green et al. 1999)	Plasma	DHF/DSS	19	534.884	211.978	12	376.744	141.55	0.534987
TNF-a				2	(Kittigul et al. 2000)	Sera	DHF/DSS	1	23		5	73.4609	42.0096
TNF-a				3	(Kittigul et al. 2000)	Sera	DHF/DSS	1	36		6	46.3986	25.4886
TNF-a	22	12.2283	10.8348	4	(Kittigul et al. 2000)	Sera	DHF/DSS	4	49.25	18.4639	18	61.4783	24.0614	0.686813
TNF-a	13	17.4348	21.3672	5	(Kittigul et al. 2000)	Sera	DHF/DSS	3	52	24.5764	10	69.4348	50.5198	0.756306
TNF-a				6	(Kittigul et al. 2000)	Sera	DHF/DSS	1	42
IL-12	30	2.75837	1.66883	1-5	(Braga et al. 2001)	Sera	DHF/DSS	15	1.44953	2.17386	15	4.2079	6.08682	0.669546
TNF-a	24	106.879	51.9869	1-5	(Braga et al. 2001)	Sera	DHF/DSS	16	23.1701	15.5885	8	130.049	146.627	0.468556
sTNF-R2	30	314.286	295.361	1-5	(Braga et al. 2001)	Sera	DHF/DSS	15	3063.1	695.803	15	3377.38	907.981	0.783514
IFN-g	30	-4.67335	12.5406	1-5	(Braga et al. 2001)	Sera	DHF/DSS	15	63.8273	33.1293	15	59.1539	35.5169	0.923346
P-Selectin	12	-47	13.2665	1	(Murgue, Cassar, and Deparis 2001)	Plasma	DHF/DSS	11	76	44	1	29		0.285439
P-Selectin	26	-19	10.1016	2	(Murgue, Cassar, and Deparis 2001)	Plasma	DHF/DSS	24	57	41	2	38	8	0.649226
P-Selectin	37	-11	11.5953	3	(Murgue, Cassar, and Deparis 2001)	Plasma	DHF/DSS	34	50	36	3	39	17	0.782319
P-Selectin	45	-21	6.39754	4	(Murgue, Cassar, and Deparis 2001)	Plasma	DHF/DSS	35	47	29	10	26	13	0.508752
P-Selectin	43	-17	5.49463	5	(Murgue, Cassar, and Deparis 2001)	Plasma	DHF/DSS	33	39	27	10	22	9	0.550294
P-Selectin	31	-14	8.52331	6	(Murgue, Cassar, and Deparis 2001)	Plasma	DHF/DSS	23	41	32	8	27	15	0.692003
P-Selectin	18	-12	13.0027	7	(Murgue, Cassar, and Deparis 2001)	Plasma	DHF/DSS	14	49	41	4	37	14	0.781795
P-Selectin	15	17	15.0067	8	(Murgue, Cassar, and Deparis 2001)	Plasma	DHF/DSS	10	49	30	5	66	26	0.668488
L-Selectin	12	-315	133.268	1	(Murgue, Cassar, and Deparis 2001)	Plasma	DHF/DSS	11	1543	442	1	1228		0.47605
L-Selectin	26	-582	1052.06	2	(Murgue, Cassar, and Deparis 2001)	Plasma	DHF/DSS	24	1613	5151	2	1031	51	0.910045
L-Selectin	37	-155	293.357	3	(Murgue, Cassar, and Deparis 2001)	Plasma	DHF/DSS	34	1528	510	3	1373	485	0.825688
L-Selectin	45	-118	172.433	4	(Murgue, Cassar, and Deparis 2001)	Plasma	DHF/DSS	35	1509	484	10	1391	480	0.862567
L-Selectin	43	-173	121.623	5	(Murgue, Cassar, and Deparis 2001)	Plasma	DHF/DSS	33	1535	416	10	1362	309	0.738497
L-Selectin	31	-93	97.0325	6	(Murgue, Cassar, and Deparis 2001)	Plasma	DHF/DSS	23	1458	324	8	1365	197	0.806255
L-Selectin	18	-79	134.395	7	(Murgue, Cassar, and Deparis 2001)	Plasma	DHF/DSS	14	1443	485	4	1364	71	0.87196
L-Selectin	15	-27	157.899	8	(Murgue, Cassar, and Deparis 2001)	Plasma	DHF/DSS	10	1459	211	5	1432	320	0.943843
sVCAM-1	12	397	41.0055	1	(Murgue, Cassar, and Deparis 2001)	Plasma	DHF/DSS	11	777	136	1	1174		0.00351024
sVCAM-1	26	419	411.23	2	(Murgue, Cassar, and Deparis 2001)	Plasma	DHF/DSS	24	806	252	2	1225	577	0.505749
sVCAM-1	37	199	294.758	3	(Murgue, Cassar, and Deparis 2001)	Plasma	DHF/DSS	34	912	505	3	1111	488	0.776893
sVCAM-1	45	444	190.276	4	(Murgue, Cassar, and Deparis 2001)	Plasma	DHF/DSS	35	1111	691	10	1555	475	0.596453
sVCAM-1	43	383	232.94	5	(Murgue, Cassar, and Deparis 2001)	Plasma	DHF/DSS	33	1358	672	10	1741	637	0.67914
sVCAM-1	31	378	217.827	6	(Murgue, Cassar, and Deparis 2001)	Plasma	DHF/DSS	23	1450	596	8	1828	506	0.628752
sVCAM-1	18	210	240.3	7	(Murgue, Cassar, and Deparis 2001)	Plasma	DHF/DSS	14	1812	560	4	2022	376	0.755548
sVCAM-1	15	-257	326.593	8	(Murgue, Cassar, and Deparis 2001)	Plasma	DHF/DSS	10	1777	330	5	1520	692	0.737458
IL-13	50	145	19.526	1-18	(Mustafa et al. 2001)	Sera	DSS	24	22	12	26	167	98.7767	0.145049
IL-18	50	257	29.056	1-18	(Mustafa et al. 2001)	Sera	DSS	24	76	50	26	333	138.716	0.0813452
IL-2r	41	3381	456.889	6-11	(Libraty et al. 2002)	Plasma	DHF/DSS	12	13273	1377	29	16654	1213	0.527821
IL-10	41	50	5.55355	6-11	(Libraty et al. 2002)	Plasma	DHF/DSS	12	95	17	29	145	14	0.198855
sTNF-R2	41	5263	204.44	6-11	(Libraty et al. 2002)	Plasma	DHF/DSS	12	7357	513	29	12620	759	0.0231844
IFN-a2	41	13	4.41653	6-11	(Libraty et al. 2002)	Plasma	DHF/DSS	12	55	10	29	68	18	9.19378e-09
IFN-g	41	80	13.4401	6-11	(Libraty et al. 2002)	Plasma	DHF/DSS	12	138	31	29	218	54	0.065412
sVCAM-1	97.6667	182.655	160.793	1-7	(Koraka et al., 2004)	Plasma	DHF/DSS	39.6667	808	815	58	990.655	726.87	0.867166
sVCAM-1	34.5	357.772	275.857	8-13	(Koraka et al., 2004)	Plasma	DHF/DSS	6	487	617	28.5	844.772	600.413	0.677726
sVCAM-1	57	-34	226.314	1-7	(Koraka et al., 2004)	Plasma	DHF	39.6667	808	815	17.3333	774	773	0.975853
sVCAM-1	9.5	99	431.308	8-13	(Koraka et al., 2004)	Plasma	DHF	6	487	617	3.5	586	655	0.912394
sVCAM-1	80.3333	275	168.277	1-7	(Koraka et al., 2004)	Plasma	DSS	39.6667	808	815	40.6667	1083	686	0.796293
sVCAM-1	31	394	277.736	8-13	(Koraka et al., 2004)	Plasma	DSS	6	487	617	25	881	585	0.64308
RANTES	26	-14.6673	7.69693	1-3	(Perez et al. 2004)	Sera	DHF/DSS	21	46.9916	28.7081	5	32.3243	9.99927	0.629464
RANTES	26	-25.3847	7.84694	4-5	(Perez et al. 2004)	Sera	DHF/DSS	21	41.2766	32.6727	5	15.8919	7.32826	0.448389
RANTES	25	-20.2492	12.3988	6	(Perez et al. 2004)	Sera	DHF/DSS	20	36.3574	29.567	5	16.1081	23.4541	0.59158
IL-10	25	21.7871	9.54135	1-3	(Perez et al. 2004)	Sera	DHF/DSS	20	23.7423	37.5309	5	45.5294	10.1511	0.575223
IL-10	24	50.2919	36.072	4-5	(Perez et al. 2004)	Sera	DHF/DSS	19	39.0617	55.774	5	89.3535	75.4143	0.59184
IL-10	28	9.52868	11.2578	6	(Perez et al. 2004)	Sera	DHF/DSS	23	29.2948	42.4077	5	38.8235	15.5799	0.832958
IL-12	26	-21.2487	35.1934	1-3	(Perez et al. 2004)	Sera	DHF/DSS	21	146.138	102.075	5	124.889	60.927	0.858136
IL-12	26	10.9722	47.6962	4-5	(Perez et al. 2004)	Sera	DHF/DSS	21	113.194	81.2242	5	124.167	99.0142	0.931724
IL-12	26	7.66138	40.2719	6	(Perez et al. 2004)	Sera	DHF/DSS	21	108.783	112	5	116.444	71.5714	0.954034
IL-10	99	105.3	9.20139	2-7	(R.-F. Chen et al. 2005)	Plasma	DHF/DSS	66	11.7	3.5	33	117	52.8	0.0465963
IL-13	99	-5.2	1.10378	2-7	(R.-F. Chen et al. 2005)	Plasma	DHF/DSS	66	11.2	4.7	33	6	5.4	0.467614
IFN-a2	99	32.7	9.24824	2-7	(R.-F. Chen et al. 2005)	Plasma	DHF/DSS	66	94.1	28	33	126.8	49.3	0.564105
IFN-g	99	-46	3.02297	2-7	(R.-F. Chen et al. 2005)	Plasma	DHF/DSS	66	130.2	16.9	33	84.2	12.6	0.0290981
IL-18	50	197	73.4666	1-10	(Elzinandes L Azeredo et al. 2006)	Plasma	DHF/DSS	31	210	189	19	407	284	0.563619
TGF-b	50	9.534	3.28902	1-10	(Elzinandes L Azeredo et al. 2006)	Plasma	DHF/DSS	31	11.186	3.134	19	20.72	14.125	0.509929
ICAM-1	50	51	16.1286	1-10	(Elzinandes L Azeredo et al. 2006)	Plasma	DHF/DSS	31	149	59	19	200	53	0.520192
sST2	9	2.16333	2.4743	D -3 (2)	(Butthep et al. 2006)	Plasma	DHF/DSS	3	5.97	2.9	6	8.13333	4.4624	0.68438
sST2	24	1.045	1.34043	D -2 (3)	(Butthep et al. 2006)	Plasma	DHF/DSS	6	5.78	2.6	18	6.825	3.47295	0.809652
sST2	60	0.306667	0.971555	D -1 (4)	(Butthep et al. 2006)	Plasma	DHF/DSS	18	6.29	3.4	42	6.59667	3.55968	0.950325
sST2	84	0.839516	0.974375	D 0 (5)	(Butthep et al. 2006)	Plasma	DHF/DSS	22	6.58	3.2	62	7.41952	5.47769	0.89472
sST2	80	1.53281	0.913446	D 1 (6)	(Butthep et al. 2006)	Plasma	DHF/DSS	16	5.46	3.1	64	6.99281	3.86789	0.757147
sST2	39	3.26606	1.17689	D 2 (7)	(Butthep et al. 2006)	Plasma	DHF/DSS	6	5.19	2.2	33	8.45606	4.36894	0.504332
sST2	8	1.612	2.48556	D -3 (2)	(Butthep et al. 2006)	Plasma	DHF	3	5.97	2.9	5	7.582	4.10772	0.748522
sST2	21	0.294	1.327	D -2 (3)	(Butthep et al. 2006)	Plasma	DHF	6	5.78	2.6	15	6.074	3.08446	0.941902
sST2	56	-0.190526	0.962843	D -1 (4)	(Butthep et al. 2006)	Plasma	DHF	18	6.29	3.4	38	6.09947	3.29	0.967878
sST2	75	-0.649811	0.791579	D 0 (5)	(Butthep et al. 2006)	Plasma	DHF	22	6.58	3.2	53	5.93019	2.92242	0.880808
sST2	67	0.577647	0.914603	D 1 (6)	(Butthep et al. 2006)	Plasma	DHF	16	5.46	3.1	51	6.03765	3.46836	0.901176
sST2	28	1.37909	1.11616	D 2 (7)	(Butthep et al. 2006)	Plasma	DHF	6	5.19	2.2	22	6.56909	3.10827	0.71724
sST2	4	4.92	1.67432	D -3 (2)	(Butthep et al. 2006)	Plasma	DSS	3	5.97	2.9	1	10.89	0	0.0897814
sST2	9	4.8	1.48549	D -2 (3)	(Butthep et al. 2006)	Plasma	DSS	6	5.78	2.6	3	10.58	1.8	0.129041
sST2	22	5.03	1.06406	D -1 (4)	(Butthep et al. 2006)	Plasma	DSS	18	6.29	3.4	4	11.32	1.4	0.171318
sST2	31	9.61	2.78486	D 0 (5)	(Butthep et al. 2006)	Plasma	DSS	22	6.58	3.2	9	16.19	8.1	0.26984
sST2	29	5.28	1.09713	D 1 (6)	(Butthep et al. 2006)	Plasma	DSS	16	5.46	3.1	13	10.74	2.8	0.206241
sST2	17	7.04	1.45581	D 2 (7)	(Butthep et al. 2006)	Plasma	DSS	6	5.19	2.2	11	12.23	3.8	0.108865
IL-6	32	686.96	228.955	1-18	(Chen et al. 2006)	Sera	DHF/DSS	12	26.4	8.5	20	713.36	1023.86	0.502266
IL-10	32	570.705	174.862	1-18	(Chen et al. 2006)	Sera	DHF/DSS	12	15.5	5.3	20	586.205	781.977	0.465508
TNF-a	32	4.075	1.06989	NA	(Chen et al. 2006)	Sera	DHF/DSS	12	2.3	0.9	20	6.375	4.64146	0.388742
MIF	32	27.365	4.866	1-18	(Chen et al. 2006)	Sera	DHF/DSS	12	3.3	0.6	20	30.665	21.7476	0.208457
IFN-g	32	-3.45	8.08424	1-18	(Chen et al. 2006)	Sera	DHF/DSS	12	34.6	22.6	20	31.15	21.3502	0.911642
sE-selectin	27	11.8912	12.3841	5	(Khongphatthanayothin, Phumaphuti, Thongchaiprasit, & Poovorawan, 2006)	Sera	DHF/DSS	11	63.8528	25.8104	16	75.744	38.5339	0.918603
sICAM-1	26	23.4848	64.8875	5	(Khongphatthanayothin, Phumaphuti, Thongchaiprasit, & Poovorawan, 2006)	Sera	DHF/DSS	11	437.229	168.661	15	460.714	156.094	0.797649
MCP-1	44	1051.7	220.575	NA	(Lee et al. 2006)	Sera	DHF/DSS	4	1252	436.3	40	2303.7	206.3	0.0293191
MCP-1	34	1042.1	221.328	NA	(Lee et al. 2006)	Sera	DHF	4	1252	436.3	30	2294.1	204.7	0.0305926
MCP-1	14	1080.3	227.887	NA	(Lee et al. 2006)	Sera	DSS	4	1252	436.3	10	2332.3	208.4	0.0254662
VEGF	45	-118.125	10.8149	D -3 (2)	(Srikiatkhachorn et al. 2006)	Plasma	DHF/DSS	22	717.5	43.75	23	599.375	26.25	0.0206003
VEGF	45	-131.25	10.0216	D -2 (3)	(Srikiatkhachorn et al. 2006)	Plasma	DHF/DSS	22	704.375	39.375	23	573.125	26.25	0.00554567
VEGF	45	-78.75	10.0216	D -1 (4)	(Srikiatkhachorn et al. 2006)	Plasma	DHF/DSS	22	695.625	39.375	23	616.875	26.25	0.0960923
VEGF	45	-70	14.1593	D 0 (5)	(Srikiatkhachorn et al. 2006)	Plasma	DHF/DSS	22	721.875	61.25	23	651.875	26.25	0.293511
VEGF	45	-65.625	12.9553	D 1 (6)	(Srikiatkhachorn et al. 2006)	Plasma	DHF/DSS	22	638.75	56.875	23	573.125	21.875	0.281508
VEGFR1	45	36.3636	3.25327	D -3 (2)	(Srikiatkhachorn et al. 2006)	Plasma	DHF/DSS	22	87.2727	10.9091	23	123.636	10.9091	0.0184221
VEGFR1	45	-14.5455	5.35543	D -2 (3)	(Srikiatkhachorn et al. 2006)	Plasma	DHF/DSS	22	154.545	21.8182	23	140	12.7273	0.564715
VEGFR1	44	56.3636	4.66778	D -1 (4)	(Srikiatkhachorn et al. 2006)	Plasma	DHF/DSS	22	109.091	14.5455	22	165.455	16.3636	0.0100411
VEGFR1	44	169.091	6.66917	D 0 (5)	(Srikiatkhachorn et al. 2006)	Plasma	DHF/DSS	22	121.818	18.1818	22	290.909	25.4545	6.46224e-08
VEGFR1	45	105.455	4.33769	D 1 (6)	(Srikiatkhachorn et al. 2006)	Plasma	DHF/DSS	22	110.909	14.5455	23	216.364	14.5455	2.9514e-07
VEGFR2	45	-769.231	76.4657	D -3 (2)	(Srikiatkhachorn et al. 2006)	Plasma	DHF/DSS	22	11410.3	256.41	23	10641	256.41	0.0338949
VEGFR2	45	-961.538	76.4657	D -2 (3)	(Srikiatkhachorn et al. 2006)	Plasma	DHF/DSS	22	11923.1	256.41	23	10961.5	256.41	0.00800994
VEGFR2	45	-1602.56	86.3419	D -1 (4)	(Srikiatkhachorn et al. 2006)	Plasma	DHF/DSS	22	11474.4	256.41	23	9871.79	320.513	9.44813e-05
VEGFR2	45	-2884.62	86.3419	D 0 (5)	(Srikiatkhachorn et al. 2006)	Plasma	DHF/DSS	22	11217.9	256.41	23	8333.33	320.513	2.09788e-12
VEGFR2	45	-3910.26	76.4657	D 1 (6)	(Srikiatkhachorn et al. 2006)	Plasma	DHF/DSS	22	10897.4	256.41	23	6987.18	256.41	0
VEGFR2 bound	45	-97.0588	6.70785	D -3 (2)	(Srikiatkhachorn et al. 2006)	Plasma	DHF/DSS	22	180.882	28.6765	23	83.8235	13.2353	0.00211852
VEGFR2 bound	45	-125.735	5.64355	D 1 (6)	(Srikiatkhachorn et al. 2006)	Plasma	DHF/DSS	22	176.471	26.4706	23	50.7353	0	2.03417e-06
IL-10	250	8.3	0.495215	2-7	(Chen et al. 2007)	Plasma	DHF/DSS	168	18.9	2.6	82	27.2	4.1	0.0873371
IFN-a2	250	-15.3	0.918231	2-7	(Chen et al. 2007)	Plasma	DHF/DSS	168	36.1	9.4	82	20.8	5.1	0.152529
IFN-g	250	-15.4	1.02495	2-7	(Chen et al. 2007)	Plasma	DHF/DSS	168	52.5	7.2	82	37.1	7.8	0.146845
sVCAM-1	250	772.1	17.2595	2-7	(Chen et al. 2007)	Plasma	DHF/DSS	168	2075	113.7	82	2847.1	134.6	1.1756e-05
TNF-a	69	33.08	3.89438	NA	(Wang et al. 2007)	Plasma	DHF/DSS	44	3.49	0.36	25	36.57	19.47	0.0893694
sTNF-R1	69	2780	256.003	NA	(Wang et al. 2007)	Plasma	DHF/DSS	44	2846	212	25	5626	1270	0.0308423
sTNF-R2	69	4557	456.137	NA	(Wang et al. 2007)	Plasma	DHF/DSS	44	8289	778	25	12846	2204	0.0512121
MCP-1	14	70.6522	72.5343	D -3 (2)	(Dejnirattisai et al., 2008)	Plasma	DHF/DSS	6	206.522	103.347	8	277.174	166.88	0.718893
MCP-1	23	146.377	82.0299	D -2 (3)	(Dejnirattisai et al., 2008)	Plasma	DHF/DSS	8	184.783	116.635	15	331.159	274.639	0.623729
MCP-1	28	21.7391	56.1517	D -1 (4)	(Dejnirattisai et al., 2008)	Plasma	DHF/DSS	7	231.366	86.2093	21	253.106	209.564	0.923572
MCP-1	34	-19.5158	29.741	D 0 (5)	(Dejnirattisai et al., 2008)	Plasma	DHF/DSS	12	105.978	83.8277	22	86.4625	81.0964	0.867115
MCP-1	28	-11.4734	37.7298	D 1 (6)	(Dejnirattisai et al., 2008)	Plasma	DHF/DSS	10	103.261	90.3984	18	91.7874	104.472	0.933813
CXCL9	18	115.231	38.2157	D -2 (3)	(Dejnirattisai et al., 2008)	Plasma	DHF/DSS	5	59	46.422	13	174.231	115.684	0.355261
CXCL10	15	38461.5	14565.1	D -3 (2)	(Dejnirattisai et al., 2008)	Plasma	DHF/DSS	6	53846.2	18772.3	9	92307.7	37157.4	0.355545
CXCL10	23	44299.5	10266.8	D -2 (3)	(Dejnirattisai et al., 2008)	Plasma	DHF/DSS	7	39194.1	12796.1	16	83493.6	36225.2	0.248883
CXCL10	29	44422.2	12940.2	D -1 (4)	(Dejnirattisai et al., 2008)	Plasma	DHF/DSS	7	48351.6	24790.5	22	92773.9	41861.4	0.361204
CXCL10	42	7051.28	13259.5	D 0 (5)	(Dejnirattisai et al., 2008)	Plasma	DHF/DSS	12	65598.3	35368.4	30	72649.6	46336.9	0.90372
CXCL10	41	3680.73	12291.6	D 1 (6)	(Dejnirattisai et al., 2008)	Plasma	DHF/DSS	10	57692.3	32775.3	31	61373	36789.5	0.940451
CXCL11	21	465.517	130.967	D -2 (3)	(Dejnirattisai et al., 2008)	Plasma	DHF/DSS	7	662.562	122.667	14	1128.08	458.3	0.32649
IL-6	17	-1.42	1.27965	1-5	(Restrepo et al. 2008)	Sera	DHF/DSS	12	6.07	2.96	5	4.65	2.13	0.696986
TNF-a	24	1.21	2.67034	1-5	(Restrepo et al. 2008)	Sera	DHF/DSS	17	5.48	4.89	7	6.69	6.33	0.879761
IFN-g	27	-6.25	11.6531	1-5	(Restrepo et al. 2008)	Sera	DHF/DSS	18	20.11	30.9	9	13.86	27.29	0.879499
IL-2r	32	70	315.906	5-9	(Valero et al., 2008)	Sera	DHF/DSS	17	1840	855	15	1910	923	0.955631
sICAM-1	32	5.06	4.72147	5-9	(Valero et al., 2008)	Sera	DHF/DSS	17	68.13	6.46	15	73.19	17.25	0.783545
sST2	38	4186.05	512.866	2-3	(Houghton-Trivino et al. 2009)	Sera	DHF/DSS	21	2009.3	334.884	17	6195.35	2093.02	0.0482816
sST2	38	2679.07	532.972	4	(Houghton-Trivino et al. 2009)	Sera	DHF/DSS	21	1423.26	334.884	17	4102.33	2176.74	0.223811
sST2	38	2595.35	197.427	5-7	(Houghton-Trivino et al. 2009)	Sera	DHF/DSS	21	837.209	627.907	17	3432.56	586.047	0.00251364
IL-6	70	1.4	0.276559	NA	(Levy et al. 2010)	Sera	DHF	36	3.2	0.933333	34	4.6	1.33333	0.389682
TNF-a	70	6.66667	1.98524	NA	(Levy et al. 2010)	Sera	DHF	36	86.6667	6	34	93.3333	10	0.567551
IL-6	102	17.5962	12.0712	2-5	(Priyadarshini et al. 2010)	Plasma	DHF/DSS	70	6.95122	15.2156	32	24.5474	67.5057	0.799277
IL-6	108	-1.11166	14.7425	6-15	(Priyadarshini et al. 2010)	Plasma	DHF/DSS	78	18.9357	64.1947	30	17.8241	70.2514	0.99068
IL-8	107	25.9715	10.6077	2-5	(Priyadarshini et al. 2010)	Plasma	DHF/DSS	75	15.1886	21.0427	32	41.1601	58.4107	0.675715
IL-8	108	8.07324	12.462	6-15	(Priyadarshini et al. 2010)	Plasma	DHF/DSS	78	21.1271	38.0667	30	29.2004	64.0443	0.91371
TNF-a	104	-0.90296	2.68599	2-5	(Priyadarshini et al. 2010)	Plasma	DHF/DSS	72	4.09188	21.2451	32	3.18892	5.50123	0.96718
TNF-a	103	-2.07785	1.89665	6-15	(Priyadarshini et al. 2010)	Plasma	DHF/DSS	78	4.43239	16.0008	25	2.35455	2.80575	0.898222
IFN-g	105	3.90266	9.9455	2-5	(Priyadarshini et al. 2010)	Plasma	DHF/DSS	74	22.9567	65.0713	31	26.8593	35.9511	0.958134
IFN-g	109	-21.3574	12.1907	6-15	(Priyadarshini et al. 2010)	Plasma	DHF/DSS	79	27.6305	107.552	30	6.27315	8.10364	0.843032
IFN-b	30	-117.949	11.9582	4	(Ubol et al. 2010)	Plasma	DHF/DSS	15	182.051	46.1538	15	64.1026	3.84615	0.0108738
MMP-9	23	-147.812	59.4466	1-5	(Voraphani et al. 2010)	Sera	DHF/DSS	15	277.5	211.339	8	129.688	66.7108	0.504791
IL-4	103	0.5	0.295019	NA	(Furuta et al. 2012)	Plasma	DHF/DSS	19	6.5	1	84	7	1.7	0.799874
IL-9	103	68.3	9.43152	NA	(Furuta et al. 2012)	Plasma	DHF/DSS	19	153.1	28.4	84	221.4	62.5	0.319783
IL-17	103	52.2	4.90334	NA	(Furuta et al. 2012)	Plasma	DHF/DSS	19	36.5	18.1	84	88.7	23.9	0.0816587
VEGF	81	1845.5	97.4033	NA	(Furuta et al. 2012)	Plasma	DHF/DSS	19	684.5	238.1	62	2530	635	0.00650281
VEGFR1	103	630	76.127	NA	(Furuta et al. 2012)	Plasma	DHF/DSS	19	257.9	47.6	84	887.9	690.5	0.362705
VEGFR2	103	-6504.3	612.895	NA	(Furuta et al. 2012)	Plasma	DHF/DSS	19	16112.5	2422.5	84	9608.2	2368.3	0.0548699
IL-4	62	0.747555	0.324504	NA	(Furuta et al. 2012)	Plasma	DHF	19	6.5	1	43	7.24755	1.50495	0.679077
IL-9	62	71.5906	11.8384	NA	(Furuta et al. 2012)	Plasma	DHF	19	153.1	28.4	43	224.691	64.815	0.311691
IL-17	62	40.6771	5.21667	NA	(Furuta et al. 2012)	Plasma	DHF	19	36.5	18.1	43	77.1771	20.7063	0.139125
VEGF	38	970.28	73.4883	NA	(Furuta et al. 2012)	Plasma	DHF	19	684.5	238.1	19	1654.78	214.286	0.00245348
VEGFR1	62	19.8793	24.3692	NA	(Furuta et al. 2012)	Plasma	DHF	19	257.9	47.6	43	277.779	142.857	0.894969
VEGFR2	62	-5239.37	623.899	NA	(Furuta et al. 2012)	Plasma	DHF	19	16112.5	2422.5	43	10873.1	1859.13	0.0862052
IL-4	60	0.252506	0.370323	NA	(Furuta et al. 2012)	Plasma	DSS	19	6.5	1	41	6.75251	1.8614	0.904879
IL-9	60	64.8003	11.3971	NA	(Furuta et al. 2012)	Plasma	DSS	19	153.1	28.4	41	217.9	59.8767	0.328166
IL-17	60	64.2067	5.26308	NA	(Furuta et al. 2012)	Plasma	DSS	19	36.5	18.1	41	100.707	20.7063	0.0195634
VEGF	62	2232.21	65.5908	NA	(Furuta et al. 2012)	Plasma	DSS	19	684.5	238.1	43	2916.71	238.098	3.37488e-11
VEGFR1	60	1269.89	58.6611	NA	(Furuta et al. 2012)	Plasma	DSS	19	257.9	47.6	41	1527.79	369.049	0.000643201
VEGFR2	60	-7830.92	644.085	NA	(Furuta et al. 2012)	Plasma	DSS	19	16112.5	2422.5	41	8281.58	2084.47	0.0142724
CXCL10	62	-5.54143e+06	860192	2-3	(Kumar et al. 2012)	Sera	DHF/DSS	44	6.18113e+06	5.69434e+06	18	639702	231902	0.330881
CXCL10	62	-70827.6	15805.3	4-7	(Kumar et al. 2012)	Sera	DHF/DSS	44	167453	24676.2	18	96625.1	65172.5	0.309459
IL-1b	62	-1.6	0.0765414	2-3	(Kumar et al. 2012)	Sera	DHF/DSS	44	3.3	0.4	18	1.7	0.2	0.000346619
IL-1b	62	-1	0.0653275	4-7	(Kumar et al. 2012)	Sera	DHF/DSS	44	2.4	0.3	18	1.4	0.2	0.00554567
IL-4	62	-4	0.243294	2-3	(Kumar et al. 2012)	Sera	DHF/DSS	44	13	0.4	18	9	1	0.000204084
IL-4	62	0.5	0.252463	4-7	(Kumar et al. 2012)	Sera	DHF/DSS	44	8.3	0.6	18	8.8	1	0.668108
IL-17	62	-76.5	3.23863	2-3	(Kumar et al. 2012)	Sera	DHF/DSS	44	134.7	8.2	18	58.2	12.7	4.18251e-07
IL-17	62	-16.4	2.71875	4-7	(Kumar et al. 2012)	Sera	DHF/DSS	44	60.4	7.8	18	44	10.4	0.207115
VEGF	62	-87.7	18.427	2-3	(Kumar et al. 2012)	Sera	DHF/DSS	44	380	32.3	18	292.3	75.4	0.284998
VEGF	62	38.5	10.8996	4-7	(Kumar et al. 2012)	Sera	DHF/DSS	44	232.3	26.2	18	270.8	43.1	0.445282
IFN-g	62	-513.5	40.6645	2-3	(Kumar et al. 2012)	Sera	DHF/DSS	44	770.3	262.2	18	256.8	40.5	0.0529319
IFN-g	62	-137.8	19.5626	4-7	(Kumar et al. 2012)	Sera	DHF/DSS	44	408.1	110.8	18	270.3	43.2	0.246568
MCP-1	34	-458.958	172.388	2-9	(de-Oliveira-Pinto et al., 2012)	Sera	WS/SD	13	736.014	597.324	21	277.056	218.421	0.470525
MIP-1b	40	-52.6235	25.8226	2-9	(de-Oliveira-Pinto et al., 2012)	Sera	WS/SD	21	146.851	95.5221	19	94.2275	66.4372	0.651075
RANTES	43	9184.21	11768.5	2-9	(de-Oliveira-Pinto et al., 2012)	Sera	WS/SD	22	46316.6	40888.2	21	55500.8	36230	0.866492
IL-1b	37	1.6	6.73059	3-6	(Guerrero et al. 2013)	Plasma	SD	25	12	18	12	13.6	19.7	0.952188
IL-6	62	18.4	8.82087	3-6	(Guerrero et al. 2013)	Plasma	SD	34	15	16.2	28	33.4	44.3	0.696473
IL-8	63	189.8	186.056	3-6	(Guerrero et al. 2013)	Plasma	SD	35	88.4	295.8	28	278.2	948.3	0.848472
IL-33	40	-18.6	99.1379	3-6	(Guerrero et al. 2013)	Plasma	SD	26	135.5	419.2	14	116.9	207.3	0.968274
TNF-a	39	-0.7	2.22619	3-6	(Guerrero et al. 2013)	Plasma	SD	27	5.7	9.5	12	5	4.4	0.946692
sST2	67	7774.5	3749.11	3-6	(Guerrero et al. 2013)	Plasma	SD	39	1641.1	2369	28	9415.6	19736.6	0.695719
IL-17	211	1.65	0.666057	NA	(Jain et al. 2013)	Sera	SD	90	3.36	3.5	121	5.01	6.1	0.814507
IL-10	259	108.2	96.1867	4-5, 10-14	(Malavige et al. 2013)	Sera	SD	219	183.4	472.8	40	291.6	573.8	0.884293
MIF	64	29224	12571.4	4-5, 10-14	(Malavige et al. 2013)	Sera	SD	7	39783	26139	57	69007	58692	0.649216
IFN-a2	78	18.67	45.8007	4-5, 10-14	(Malavige et al. 2013)	Sera	SD	20	83.33	167.4	58	102	201	0.9431
IFN-g	78	-94.8	84.9058	4-5, 10-14	(Malavige et al. 2013)	Sera	SD	20	268.8	346.2	58	174	265.6	0.828007
IL-6	30	2.60963	0.655206	NA	(Arias et al. 2014)	Sera	SD	22	5.62567	1.99086	8	8.23529	1.41176	0.284957
IL-12	30	-22.9339	16.0146	NA	(Arias et al. 2014)	Sera	SD	22	91.1157	44.7872	8	68.1818	36.3636	0.690975
IL-17	30	10.9091	12.5862	NA	(Arias et al. 2014)	Sera	SD	22	43.2086	22.3829	8	54.1176	32.9412	0.784147
TNF-a	30	8.58586	8.38274	NA	(Arias et al. 2014)	Sera	SD	22	43.6364	21.1175	8	52.2222	20	0.767843
sTNF-R1	30	1090.91	719.418	NA	(Arias et al. 2014)	Sera	SD	22	2909.09	1515.08	8	4000	1818.18	0.64484
sTNF-R2	30	10721	2632.39	NA	(Arias et al. 2014)	Sera	SD	22	6520.38	4653.14	8	17241.4	6896.55	0.197517
sST2	30	184.711	14.9302	NA	(Arias et al. 2014)	Sera	SD	22	51.6529	17.3709	8	236.364	40.9091	3.23867e-05
sTRAIL	30	-19.8347	9.61577	NA	(Arias et al. 2014)	Sera	SD	22	101.653	29.7257	8	81.8182	20.4545	0.582531
TNF-a	61	-36.2719	22.4656	1-11	(Limonta et al. 2014)	Plasma	SD	45	69.8246	108.175	16	33.5526	62.5667	0.771622
sTRAIL	63	-432.134	87.5959	1-11	(Limonta et al. 2014)	Plasma	SD	50	695.161	567.057	13	263.027	127.066	0.457104
VEGF	21	-19.3667	22.4245	NA	(Misra, Kalita, and Singh 2014)	Sera	DHF/DSS	12	58.3	71.8	9	38.9333	25.6769	0.799512
VEGF	20	-18	22.5746	NA	(Misra, Kalita, and Singh 2014)	Sera	DHF	12	58.3	71.8	8	40.3	25.3	0.813086
VEGF	13	-30.3	20.7269	NA	(Misra, Kalita, and Singh 2014)	Sera	DSS	12	58.3	71.8	1	28	0	0.673021
TNF-a	81	97.3444	21.0525	NA	(Soundravally et al. 2014)	Plasma	DHF/DSS	27	102.2	37.4	54	199.544	145.381	0.516683
IFN-g	81	-8.22222	3.58686	NA	(Soundravally et al. 2014)	Plasma	DHF/DSS	27	28.3	18.5	54	20.0778	3.20016	0.661429
TNF-a	57	46.5	20.922	NA	(Soundravally et al. 2014)	Plasma	DHF	27	102.2	37.4	30	148.7	107.6	0.683126
IFN-g	57	-9.2	3.60221	NA	(Soundravally et al. 2014)	Plasma	DHF	27	28.3	18.5	30	19.1	3	0.623508
TNF-a	51	160.9	33.4436	NA	(Soundravally et al. 2014)	Plasma	DSS	27	102.2	37.4	24	263.1	160	0.327467
IFN-g	51	-7	3.61261	NA	(Soundravally et al. 2014)	Plasma	DSS	27	28.3	18.5	24	21.3	3	0.708777
IL-21	152	-2.94129	28.8415	1-7	(Vivanco-Cid et al. 2014)	Sera	DHF/DSS	103	145.836	229.337	49	142.894	125.454	0.991023
IL-21	89	-46.5078	35.0158	8-10	(Vivanco-Cid et al. 2014)	Sera	DHF/DSS	41	152.15	201.141	48	105.642	107.181	0.838309
CXCL10	108	1.05584	0.447742	1-7	(Conroy et al. 2015)	Sera	DHF/DSS	63	2.76626	2.13897	45	3.82211	2.3986	0.742507
sICAM-1	111	102.005	42.5417	1-7	(Conroy et al. 2015)	Sera	DHF/DSS	65	375.13	153.63	46	477.135	257.968	0.734058
IL-1b	18	0.336364	0.212625	D -2 (3)	(Chunhakan et al. 2015)	Plasma	DHF/DSS	7	0.5	0.2	11	0.836364	0.659124	0.625314
IL-1b	55	-1.71053	0.673785	D -1 (4)	(Chunhakan et al. 2015)	Plasma	DHF/DSS	17	2.7	2.7	38	0.989474	0.977837	0.551398
IL-1b	101	-1.05538	0.313271	D 0 (5)	(Chunhakan et al. 2015)	Plasma	DHF/DSS	36	2.1	1.7	65	1.04462	1.07749	0.600027
IL-1b	97	-1.30299	0.265711	D 1 (6)	(Chunhakan et al. 2015)	Plasma	DHF/DSS	30	2.4	1.2	67	1.09701	1.2306	0.448411
IL-1b	29	-1.36316	0.490382	D 2 (7)	(Chunhakan et al. 2015)	Plasma	DHF/DSS	10	2.1	1.5	19	0.736842	0.54223	0.392747
IL-10	18	-16.8545	12.7347	D -2 (3)	(Chunhakan et al. 2015)	Plasma	DHF/DSS	7	44	28.8	11	27.1455	21.92	0.64144
IL-10	55	73.6684	10.8898	D -1 (4)	(Chunhakan et al. 2015)	Plasma	DHF/DSS	17	41.1	22.9	38	114.768	57.7416	0.235636
IL-10	101	-2.25846	7.47378	D 0 (5)	(Chunhakan et al. 2015)	Plasma	DHF/DSS	36	56.7	37.5	65	54.4415	33.0404	0.963957
IL-10	97	0.634328	4.17918	D 1 (6)	(Chunhakan et al. 2015)	Plasma	DHF/DSS	30	29	14.3	67	29.6343	26.7113	0.983297
IL-10	29	-1.48421	3.91132	D 2 (7)	(Chunhakan et al. 2015)	Plasma	DHF/DSS	10	14.4	10.1	19	12.9158	9.84126	0.916178
TNF-a	18	0.454545	0.910064	D -2 (3)	(Chunhakan et al. 2015)	Plasma	DHF/DSS	7	4	2	11	4.45455	1.68067	0.861869
TNF-a	55	0.510526	0.56374	D -1 (4)	(Chunhakan et al. 2015)	Plasma	DHF/DSS	17	4.1	2	38	4.61053	1.77068	0.84843
TNF-a	101	-0.861538	0.370016	D 0 (5)	(Chunhakan et al. 2015)	Plasma	DHF/DSS	36	4.3	1.9	65	3.43846	1.54311	0.724853
TNF-a	97	-0.283582	0.341942	D 1 (6)	(Chunhakan et al. 2015)	Plasma	DHF/DSS	30	3.8	1.5	67	3.51642	1.67599	0.899668
TNF-a	29	-0.436842	0.472466	D 2 (7)	(Chunhakan et al. 2015)	Plasma	DHF/DSS	10	3.5	1.2	19	3.06316	1.22689	0.799076
IL-1b	16	0.388889	0.242307	D -2 (3)	(Chunhakan et al. 2015)	Plasma	DHF	7	0.5	0.2	9	0.888889	0.69064	0.588602
IL-1b	49	-1.7875	0.678145	D -1 (4)	(Chunhakan et al. 2015)	Plasma	DHF	17	2.7	2.7	32	0.9125	0.996912	0.534563
IL-1b	92	-1.04821	0.319267	D 0 (5)	(Chunhakan et al. 2015)	Plasma	DHF	36	2.1	1.7	56	1.05179	1.10118	0.604798
IL-1b	86	-1.26429	0.279751	D 1 (6)	(Chunhakan et al. 2015)	Plasma	DHF	30	2.4	1.2	56	1.13571	1.30177	0.475171
IL-1b	20	-1.42	0.516672	D 2 (7)	(Chunhakan et al. 2015)	Plasma	DHF	10	2.1	1.5	10	0.68	0.647688	0.384788
IL-10	16	-17.2889	13.3179	D -2 (3)	(Chunhakan et al. 2015)	Plasma	DHF	7	44	28.8	9	26.7111	23.019	0.63912
IL-10	49	66.3875	10.9182	D -1 (4)	(Chunhakan et al. 2015)	Plasma	DHF	17	41.1	22.9	32	107.487	53.174	0.251515
IL-10	92	-0.194643	7.69209	D 0 (5)	(Chunhakan et al. 2015)	Plasma	DHF	36	56.7	37.5	56	56.5054	33.5547	0.996914
IL-10	86	-7	3.14085	D 1 (6)	(Chunhakan et al. 2015)	Plasma	DHF	30	29	14.3	56	22	13.066	0.717818
IL-10	20	-4.71	3.92124	D 2 (7)	(Chunhakan et al. 2015)	Plasma	DHF	10	14.4	10.1	10	9.69	7.19383	0.704066
TNF-a	16	0.533333	0.937745	D -2 (3)	(Chunhakan et al. 2015)	Plasma	DHF	7	4	2	9	4.53333	1.66476	0.837607
TNF-a	49	0.60625	0.561352	D -1 (4)	(Chunhakan et al. 2015)	Plasma	DHF	17	4.1	2	32	4.70625	1.59822	0.812809
TNF-a	92	-0.758929	0.372986	D 0 (5)	(Chunhakan et al. 2015)	Plasma	DHF	36	4.3	1.9	56	3.54107	1.47482	0.752357
TNF-a	86	-0.535714	0.323919	D 1 (6)	(Chunhakan et al. 2015)	Plasma	DHF	30	3.8	1.5	56	3.26429	1.29449	0.786868
TNF-a	20	-0.74	0.501797	D 2 (7)	(Chunhakan et al. 2015)	Plasma	DHF	10	3.5	1.2	10	2.76	1.03827	0.640971
IL-1b	9	0.1	0.0759229	D -2 (3)	(Chunhakan et al. 2015)	Plasma	DSS	7	0.5	0.2	2	0.6	0.01	0.617514
IL-1b	23	-1.3	0.714486	D -1 (4)	(Chunhakan et al. 2015)	Plasma	DSS	17	2.7	2.7	6	1.4	0.7	0.641164
IL-1b	45	-1.1	0.412647	D 0 (5)	(Chunhakan et al. 2015)	Plasma	DSS	36	2.1	1.7	9	1	0.9	0.567415
IL-1b	41	-1.5	0.304213	D 1 (6)	(Chunhakan et al. 2015)	Plasma	DSS	30	2.4	1.2	11	0.9	0.7	0.280265
IL-1b	19	-1.3	0.492725	D 2 (7)	(Chunhakan et al. 2015)	Plasma	DSS	10	2.1	1.5	9	0.8	0.4	0.402366
IL-10	9	-14.9	13.4615	D -2 (3)	(Chunhakan et al. 2015)	Plasma	DSS	7	44	28.8	2	29.1	11.2	0.629676
IL-10	23	112.5	27.1111	D -1 (4)	(Chunhakan et al. 2015)	Plasma	DSS	17	41.1	22.9	6	153.6	65	0.10259
IL-10	45	-15.1	10.5236	D 0 (5)	(Chunhakan et al. 2015)	Plasma	DSS	36	56.7	37.5	9	41.6	25.4	0.738841
IL-10	41	39.5	12.5462	D 1 (6)	(Chunhakan et al. 2015)	Plasma	DSS	30	29	14.3	11	68.5	40.7	0.359854
IL-10	19	2.1	4.7877	D 2 (7)	(Chunhakan et al. 2015)	Plasma	DSS	10	14.4	10.1	9	16.5	10.7	0.88651
TNF-a	9	0.1	1.42001	D -2 (3)	(Chunhakan et al. 2015)	Plasma	DSS	7	4	2	2	4.1	1.7	0.96961
TNF-a	23	0	1.13003	D -1 (4)	(Chunhakan et al. 2015)	Plasma	DSS	17	4.1	2	6	4.1	2.5	1
TNF-a	45	-1.5	0.678438	D 0 (5)	(Chunhakan et al. 2015)	Plasma	DSS	36	4.3	1.9	9	2.8	1.8	0.566563
TNF-a	41	1	0.830389	D 1 (6)	(Chunhakan et al. 2015)	Plasma	DSS	30	3.8	1.5	11	4.8	2.6	0.739022
TNF-a	19	-0.1	0.576002	D 2 (7)	(Chunhakan et al. 2015)	Plasma	DSS	10	3.5	1.2	9	3.4	1.3	0.954925
CXCL10	9	9583.53	1808.1	5	(Ferreira et al. 2015)	Plasma	DHF/DSS	3	3324.29	2636.98	6	12907.8	2389.13	0.00707536
CXCL10	11	3916.99	2692.49	6	(Ferreira et al. 2015)	Plasma	DHF/DSS	3	9456.7	3312.98	8	13373.7	5359.75	0.534176
CXCL10	26	7455.06	1444.73	7	(Ferreira et al. 2015)	Plasma	DHF/DSS	6	2441.91	1600.51	20	9896.96	5762.47	0.212567
CXCL10	38	4311.15	1816.23	8	(Ferreira et al. 2015)	Plasma	DHF/DSS	11	5328.16	4482.16	27	9639.31	6305.08	0.577327
CXCL10	19	5926.75	1562.36	9	(Ferreira et al. 2015)	Plasma	DHF/DSS	5	3398.13	1012.96	14	9324.88	5594.69	0.297224
CXCL10	24	3045.11	1314.91	10	(Ferreira et al. 2015)	Plasma	DHF/DSS	5	3314.9	1686.76	19	6360.01	4694.6	0.541574
CXCL10	17	1131.26	1703.44	11	(Ferreira et al. 2015)	Plasma	DHF/DSS	3	2904.39	1991.3	14	4035.65	4703.1	0.824704
CXCL10	10	2739.78	2530.6	12	(Ferreira et al. 2015)	Plasma	DHF/DSS	4	1385.21	691.381	6	4124.99	6140.58	0.657495
IL-10	15	1883.94	848.566	5	(Ferreira et al. 2015)	Plasma	DHF/DSS	7	594.713	689.945	8	2478.65	2283.96	0.429753
IL-10	36	595.926	181.805	7	(Ferreira et al. 2015)	Plasma	DHF/DSS	8	154.56	229.248	28	750.486	861.128	0.503663
IL-10	31	-2750.18	3034.69	8	(Ferreira et al. 2015)	Plasma	DHF/DSS	7	3410.78	8002.02	24	660.593	1218.43	0.73403
IL-10	19	275.417	86.4233	9	(Ferreira et al. 2015)	Plasma	DHF/DSS	5	50.2298	21.6425	14	325.647	321.332	0.392456
IL-10	26	42.7285	33.9329	10	(Ferreira et al. 2015)	Plasma	DHF/DSS	3	86.8341	39.6495	23	129.563	120.127	0.735536
IL-10	23	224.079	116.603	11	(Ferreira et al. 2015)	Plasma	DHF/DSS	3	129.635	61.7746	20	353.714	496.472	0.654234
IL-10	12	18.9308	49.3787	12	(Ferreira et al. 2015)	Plasma	DHF/DSS	3	75.2441	79.4544	9	94.1749	54.8202	0.844524
IL-10	5	69.4844	31.7425	13	(Ferreira et al. 2015)	Plasma	DHF/DSS	1	17.4077		4	86.8921	63.4851
IL-10	2	-43.4767	0	16	(Ferreira et al. 2015)	Plasma	DHF/DSS	1	84.3191		1	40.8424
IL-13	3	-4.71212	4.74128	4	(Ferreira et al. 2015)	Plasma	DHF/DSS	2	4.84128	6.70518	1	0.129155
IL-13	14	-19.5581	7.05758	5	(Ferreira et al. 2015)	Plasma	DHF/DSS	9	25.6349	19.2315	5	6.07685	6.60104	0.336103
IL-13	30	10.5749	14.2005	7	(Ferreira et al. 2015)	Plasma	DHF/DSS	23	23.0863	39.3375	7	33.6612	30.6697	0.832103
IL-13	33	-13.5125	7.70291	8	(Ferreira et al. 2015)	Plasma	DHF/DSS	21	24.2142	30.8039	12	10.7017	13.0308	0.686211
IL-13	21	15.2802	32.837	9	(Ferreira et al. 2015)	Plasma	DHF/DSS	15	22.883	28.622	6	38.1632	78.3705	0.854686
IL-13	28	-6.84113	5.43614	10	(Ferreira et al. 2015)	Plasma	DHF/DSS	23	14.5576	21.3108	5	7.71648	7.0021	0.760384
IL-13	20	-3.95315	12.5782	11	(Ferreira et al. 2015)	Plasma	DHF/DSS	17	25.2397	26.228	3	21.2865	18.7946	0.902492
IL-13	12	29.1383	18.6748	12	(Ferreira et al. 2015)	Plasma	DHF/DSS	7	10.9622	14.6488	5	40.1006	39.8805	0.492816
IL-13	2	-27.7256	0	13	(Ferreira et al. 2015)	Plasma	DHF/DSS	1	27.8256		1	0.1
IL-13	2	-1.5681	0	16	(Ferreira et al. 2015)	Plasma	DHF/DSS	1	1.6681		1	0.1
TNF-a	3	3.07942	6.3816	4	(Ferreira et al. 2015)	Plasma	DHF/DSS	1	11.1588		2	14.2383	9.02494
TNF-a	13	17.9913	9.25636	5	(Ferreira et al. 2015)	Plasma	DHF/DSS	6	17.394	7.17074	7	35.3853	23.233	0.459334
TNF-a	26	4.14823	6.43915	7	(Ferreira et al. 2015)	Plasma	DHF/DSS	7	17.7183	13.928	19	21.8665	16.1632	0.845846
TNF-a	35	40.4088	32.3939	8	(Ferreira et al. 2015)	Plasma	DHF/DSS	13	22.8147	15.5747	22	63.2236	150.584	0.789528
TNF-a	19	-10.0532	9.79115	9	(Ferreira et al. 2015)	Plasma	DHF/DSS	6	28.2435	22.4732	13	18.1904	12.3291	0.694913
TNF-a	20	2.6335	3.93823	10	(Ferreira et al. 2015)	Plasma	DHF/DSS	3	15.4429	3.60063	17	18.0764	13.7912	0.853416
TNF-a	22	4.10865	6.43845	11	(Ferreira et al. 2015)	Plasma	DHF/DSS	3	20.0303	5.6847	19	24.1389	24.1444	0.86844
TNF-a	15	-21.7794	14.2944	12	(Ferreira et al. 2015)	Plasma	DHF/DSS	5	39.7411	30.1213	10	17.9617	15.1228	0.518158
TNF-a	5	6.49763	2.83596	13	(Ferreira et al. 2015)	Plasma	DHF/DSS	1	4.64159		4	11.1392	5.67193
TNF-a	2	1.7968	0	16	(Ferreira et al. 2015)	Plasma	DHF/DSS	1	15.5052		1	17.302
MIF	2	-10109.5	0	4	(Ferreira et al. 2015)	Plasma	DHF/DSS	1	16259.6		1	6150.2
MIF	17	4955.75	4956.44	5	(Ferreira et al. 2015)	Plasma	DHF/DSS	9	7637.84	5900.12	8	12593.6	12868.1	0.726282
MIF	27	2408.07	5775.69	7	(Ferreira et al. 2015)	Plasma	DHF/DSS	21	9602.02	6074.02	6	12010.1	13769.9	0.872878
MIF	30	-2528.48	2277.55	8	(Ferreira et al. 2015)	Plasma	DHF/DSS	18	10754.1	8645.22	12	8225.59	3524.21	0.78652
MIF	21	-4170.99	2588.82	9	(Ferreira et al. 2015)	Plasma	DHF/DSS	16	11520.2	9157.68	5	7349.19	2702.34	0.662227
MIF	25	-943.533	2793.37	10	(Ferreira et al. 2015)	Plasma	DHF/DSS	19	9181.5	8166.58	6	8237.97	5075.09	0.921829
MIF	15	9933.4	10434.7	11	(Ferreira et al. 2015)	Plasma	DHF/DSS	12	9083.13	6225.62	3	19016.5	17803.3	0.598416
MIF	11	2872.53	7461.39	12	(Ferreira et al. 2015)	Plasma	DHF/DSS	6	12637.5	10408.1	5	15510	13714.5	0.867492
IFN-g	15	7.35492	25.0917	5	(Ferreira et al. 2015)	Plasma	DHF/DSS	8	36.2072	61.3839	7	43.5621	33.319	0.916134
IFN-g	36	3.68964	9.48434	7	(Ferreira et al. 2015)	Plasma	DHF/DSS	7	17.7003	19.8855	29	21.3899	31.1515	0.920475
IFN-g	34	13.2225	29.2673	8	(Ferreira et al. 2015)	Plasma	DHF/DSS	13	48.4844	85.0724	21	61.7069	79.354	0.90951
IFN-g	19	41.2216	23.3683	9	(Ferreira et al. 2015)	Plasma	DHF/DSS	5	8.21253	6.76209	14	49.4341	86.701	0.635496
IFN-g	27	32.8906	16.7008	10	(Ferreira et al. 2015)	Plasma	DHF/DSS	5	7.15313	6.25812	22	40.0438	77.2261	0.671195
IFN-g	22	37.0874	18.2447	11	(Ferreira et al. 2015)	Plasma	DHF/DSS	4	11.1959	10.4192	18	48.2834	74.1832	0.620541
IFN-g	12	5.21098	4.24119	12	(Ferreira et al. 2015)	Plasma	DHF/DSS	6	3.30889	4.71998	6	8.51987	9.25461	0.61595
IFN-g	3	5.0175	1.69919	13	(Ferreira et al. 2015)	Plasma	DHF/DSS	1	0.0962351		2	5.11373	2.40301
IFN-g	2	0.829884	0	16	(Ferreira et al. 2015)	Plasma	DHF/DSS	1	0.0962351		1	0.926119
IL-18	77	83.8385	71.4275	NA	(Michels et al. 2015)	Plasma	SD	65	187.524	121.114	12	271.363	241.898	0.756628
IL-18BP	76	-2.29057	2.67678	NA	(Michels et al. 2015)	Plasma	SD	64	18.2215	8.23111	12	15.931	8.56028	0.847053
IL-18FP	74	37.2147	23.9494	NA	(Michels et al. 2015)	Plasma	SD	62	65.6637	42.978	12	102.878	80.7798	0.68422
IL-8	51	283.636	61.18	D -3 (2)	(Pandey et al. 2015)	Sera	SD	30	189.091	180.219	21	472.727	236.364	0.339952
IL-8	71	234.604	46.7704	D -2 (3)	(Pandey et al. 2015)	Sera	SD	31	219.941	145.326	40	454.545	245.455	0.41082
IL-8	62	182.955	37.8125	D -1 (4)	(Pandey et al. 2015)	Sera	SD	24	180.682	124.386	38	363.636	172.727	0.390047
IL-8	27	50.9091	70.0585	D 0 (5)	(Pandey et al. 2015)	Sera	SD	5	203.636	144.428	22	254.545	127.273	0.791428
IL-10	51	-3.33333	45.0641	D -3 (2)	(Pandey et al. 2015)	Sera	SD	30	103.333	169.647	21	100	150	0.988256
IL-10	71	-47.3118	65.3538	D -2 (3)	(Pandey et al. 2015)	Sera	SD	31	280.645	295.199	40	233.333	241.667	0.901304
IL-10	62	-102.083	67.9465	D -1 (4)	(Pandey et al. 2015)	Sera	SD	24	302.083	292.469	38	200	200	0.773258
IL-10	27	61.6667	119.64	D 0 (5)	(Pandey et al. 2015)	Sera	SD	5	163.333	220.857	22	225	316.667	0.873097
TGF-b	51	-24.8485	9.41742	D -3 (2)	(Pandey et al. 2015)	Sera	SD	30	52.1212	39.9757	21	27.2727	27.2727	0.607619
TGF-b	71	-29.9609	10.1009	D -2 (3)	(Pandey et al. 2015)	Sera	SD	31	66.3245	44.2736	40	36.3636	39.3939	0.613163
TGF-b	62	-8.14394	12.4719	D -1 (4)	(Pandey et al. 2015)	Sera	SD	24	71.7803	41.8118	38	63.6364	56.0606	0.907297
TGF-b	27	30.9091	33.8106	D 0 (5)	(Pandey et al. 2015)	Sera	SD	5	84.2424	75.1043	22	115.152	18.1818	0.68916
IFN-g	51	18	16.3183	D -3 (2)	(Pandey et al. 2015)	Sera	SD	30	44.5	60.5569	21	62.5	55	0.825845
IFN-g	71	35.8871	21.7253	D -2 (3)	(Pandey et al. 2015)	Sera	SD	31	76.6129	78.0212	40	112.5	105	0.783826
IFN-g	62	22.5	17.2435	D -1 (4)	(Pandey et al. 2015)	Sera	SD	24	47.5	59.8625	38	70	75	0.81462
IFN-g	27	4.5	13.3892	D 0 (5)	(Pandey et al. 2015)	Sera	SD	5	30.5	28.7533	22	35	17.5	0.893648
IL-8	40	246.7	5.72682	NA	(Patra et al. 2015)	Sera	DHF	29	147	16.1	11	393.7	16.2	0
IL-6	83	-7.4	3.6322	0-2	(de la Cruz Hernández et al. 2016)	Sera	DHF/DSS	51	36.4	23	32	29	9.5	0.766183
IL-6	88	-22.2	20.1519	3-5	(de la Cruz Hernández et al. 2016)	Sera	DHF/DSS	50	49.6	142.3	38	27.4	6.5	0.876154
IL-8	83	-75.6	42.4297	0-2	(de la Cruz Hernández et al. 2016)	Sera	DHF/DSS	51	104.7	302.5	32	29.1	13.9	0.802855
IL-8	88	-30	26.6194	3-5	(de la Cruz Hernández et al. 2016)	Sera	DHF/DSS	50	65.5	183.3	38	35.5	37.3	0.872582
IL-12	83	-1.2	0.978779	0-2	(de la Cruz Hernández et al. 2016)	Sera	DHF/DSS	51	27.4	5.2	32	26.2	3.7	0.850854
IL-12	88	1.8	1.20437	3-5	(de la Cruz Hernández et al. 2016)	Sera	DHF/DSS	50	25.6	3.9	38	27.4	6.6	0.814365
TNF-a	83	-0.7	0.526992	0-2	(de la Cruz Hernández et al. 2016)	Sera	DHF/DSS	51	3.9	3	32	3.2	1.8	0.841417
TNF-a	88	0.8	0.520688	3-5	(de la Cruz Hernández et al. 2016)	Sera	DHF/DSS	50	2.8	1.8	38	3.6	2.8	0.810069
IFN-g	83	8.6	3.95003	0-2	(de la Cruz Hernández et al. 2016)	Sera	DHF/DSS	51	45.7	5.6	32	54.3	21.9	0.703609
IFN-g	88	2.7	3.70561	3-5	(de la Cruz Hernández et al. 2016)	Sera	DHF/DSS	50	50.1	18	38	52.8	16.6	0.912197
IL-6	44	-4.96	7.83376	3	(Eppy et al. 2016)	Sera/ plasma	SD	20	19.17	30.47	24	14.21	18.94	0.890042
IL-6	44	6.26	3.05998	5	(Eppy et al. 2016)	Sera/ plasma	SD	20	3.54	2.34	24	9.8	14.77	0.6755
IL-10	40	-4.6	0.66	3	(Fernando et al. 2016)	Sera	SD	25	14.4	3.3	15	9.8		0.163336
IL-10	40	14.7	2.38123	4	(Fernando et al. 2016)	Sera	SD	25	27.2	4.3	15	41.9	8.6	0.126303
IL-10	40	16.4	1.79165	5	(Fernando et al. 2016)	Sera	SD	25	26.7	4.5	15	43.1	6	0.0287669
IL-10	14	4.2	2.26826	6	(Fernando et al. 2016)	Sera	SD	8	16.9	4.2	6	21.1	4.2	0.4795
IL-10	14	0.7	1.18796	7	(Fernando et al. 2016)	Sera	SD	8	8.8	1.9	6	9.5	2.4	0.819118
IL-10	14	-2.7	1.23811	8	(Fernando et al. 2016)	Sera	SD	8	6.4	2.9	6	3.7	1.7	0.421858
IL-17	40	44.6	13.5727	3	(Fernando et al. 2016)	Sera	SD	25	7.6	5.4	15	52.2	52.4	0.397184
IL-17	40	30	3.98075	4	(Fernando et al. 2016)	Sera	SD	25	13.3	4.6	15	43.3	15	0.0558623
IL-17	40	19.8	2.56832	5	(Fernando et al. 2016)	Sera	SD	25	7.8	2.2	15	27.6	9.8	0.0486844
IL-17	14	4.1	4.88497	6	(Fernando et al. 2016)	Sera	SD	8	20.7	5.7	6	24.8	10.9	0.738891
IL-17	14	7.8	4.13174	7	(Fernando et al. 2016)	Sera	SD	8	8.3	3.7	6	16.1	9.6	0.448367
IL-17	14	16.7	5.17892	8	(Fernando et al. 2016)	Sera	SD	8	2.4	1.7	6	19.1	12.6	0.189016
IL-1b	36	-0.7	0.241209	4	(Kamaladasa et al. 2016)	Sera	DHF/DSS	11	0.9	0.8	25	0.2	0	0.381574
IL-1b	36	2.8	0.28	4.5	(Kamaladasa et al. 2016)	Sera	DHF/DSS	11	0	0	25	2.8	1.4	0.0455003
IL-1b	36	-1.2	0.860887	5	(Kamaladasa et al. 2016)	Sera	DHF/DSS	11	3	2.7	25	1.8	1.4	0.693169
IL-1b	36	3.9	0.26	5.5	(Kamaladasa et al. 2016)	Sera	DHF/DSS	11	0	0	25	3.9	1.3	0.0026998
IL-1b	36	3.4	0.38	6	(Kamaladasa et al. 2016)	Sera	DHF/DSS	11	0	0	25	3.4	1.9	0.0735386
IL-1b	36	8.4	0.933011	6.5	(Kamaladasa et al. 2016)	Sera	DHF/DSS	11	1.5	1.2	25	9.9	4.3	0.0598913
IL-1b	36	0.8	0.14	7	(Kamaladasa et al. 2016)	Sera	DHF/DSS	11	0	0	25	0.8	0.7	0.253098
TNF-a	36	8.7	1.09272	4	(Kamaladasa et al. 2016)	Sera	DHF/DSS	11	1.8	1.3	25	10.5	5.1	0.0983258
TNF-a	36	27.9	2.63887	4.5	(Kamaladasa et al. 2016)	Sera	DHF/DSS	11	6.8	5.3	25	34.7	10.5	0.017688
TNF-a	36	13.4	2.64107	5	(Kamaladasa et al. 2016)	Sera	DHF/DSS	11	1.8	2.4	25	15.2	12.7	0.299844
TNF-a	36	36.7	2.02	5.5	(Kamaladasa et al. 2016)	Sera	DHF/DSS	11	0.9		25	37.6	10.1	0.000279425
TNF-a	36	38.9	3.77354	6	(Kamaladasa et al. 2016)	Sera	DHF/DSS	11	5.1	3.3	25	44	18.2	0.0354595
TNF-a	36	22.2	2.28433	6.5	(Kamaladasa et al. 2016)	Sera	DHF/DSS	11	4.6	4	25	26.8	9.7	0.03436
TNF-a	36	34.5	7.5861	7	(Kamaladasa et al. 2016)	Sera	DHF/DSS	11	16.7	16.9	25	51.2	28.1	0.292739
IFN-a	71	1.5	0.64906	1-5	(Oliveira et al. 2016)	Sera/ plasma	DHF/DSS	44	1.7	2.4	27	3.2	2.8	0.684196
IFN-b	77	-3.1	10.8503	1-5	(Oliveira et al. 2016)	Sera/ plasma	DHF/DSS	44	52.2	49.8	33	49.1	45	0.963162
IL-2	67	107.23	58.9436	3-5	(Senaratne, Carr, and Noordeen 2016)	Plasma	DHF/DSS	24	59.68	101.05	43	166.91	362.08	0.775453
TNF-a	67	44.41	29.5981	3-5	(Senaratne, Carr, and Noordeen 2016)	Plasma	DHF/DSS	24	51.78	17.37	43	96.19	192.69	0.818447
MCP-1	30	260.87	645.978	1-3	(Singla et al. 2016)	Plasma	SD	20	851.087	651.879	10	1111.96	1990.08	0.900862
MCP-1	43	450.287	467.597	4-6	(Singla et al. 2016)	Plasma	SD	22	613.636	431.245	21	1063.92	2100.97	0.833709
MCP-1	12	278.986	578.855	7-10	(Singla et al. 2016)	Plasma	SD	3	485.507	232.449	9	764.493	1689.25	0.870037
IL-6	32	126.266	100.238	1-3	(Singla et al. 2016)	Plasma	SD	22	5.28708	7.33114	10	131.553	316.943	0.690424
IL-6	42	43.6967	24.238	4-6	(Singla et al. 2016)	Plasma	SD	21	2.6817	2.56713	21	46.3784	111.043	0.694019
IL-6	10	12.5439	5.47395	7-10	(Singla et al. 2016)	Plasma	SD	3	4.82456	4.13027	7	17.3684	13.0363	0.358991
IL-7	32	-7.42387	2.00469	1-3	(Singla et al. 2016)	Plasma	SD	22	10.569	8.9288	10	3.14516	1.98743	0.417027
IL-7	51	-3.67983	1.49959	4-6	(Singla et al. 2016)	Plasma	SD	22	6.82777	6.4614	29	3.14794	3.19066	0.6096
IL-7	12	-3.24373	3.51885	7-10	(Singla et al. 2016)	Plasma	SD	3	5.10753	6.05287	9	1.8638	1.23656	0.599545
IL-8	31	66.431	32.9466	1-3	(Singla et al. 2016)	Plasma	SD	21	15.119	12.392	10	81.55	103.835	0.525254
IL-8	49	32.0532	11.1449	4-6	(Singla et al. 2016)	Plasma	SD	23	18.2609	16.8492	26	50.3141	53.9304	0.570509
IL-8	11	34.4097	20.3825	7-10	(Singla et al. 2016)	Plasma	SD	3	11.9444	1.9245	8	46.3542	57.5646	0.550224
IL-10	32	137.49	98.3192	1-3	(Singla et al. 2016)	Plasma	SD	23	123.79	297.54	9	261.28	228.818	0.714143
IL-10	42	25.9681	80.2814	4-6	(Singla et al. 2016)	Plasma	SD	23	185.577	242.818	19	211.545	271.57	0.943172
IL-10	12	173.043	118.173	7-10	(Singla et al. 2016)	Plasma	SD	3	23.4783	11.5033	9	196.522	353.96	0.62511
TNF-a	30	-9.77604	7.22349	1-3	(Singla et al. 2016)	Plasma	SD	20	23.1823	29.8874	10	13.4062	8.66958	0.75341
TNF-a	50	10.6384	9.62966	4-6	(Singla et al. 2016)	Plasma	SD	23	20.4303	12.0076	27	31.0687	48.3162	0.830794
TNF-a	12	9.1088	14.9846	7-10	(Singla et al. 2016)	Plasma	SD	3	16.875	6.03538	9	25.9838	43.7215	0.836494
VEGF	34	-8.96429	15.9216	1-3	(Singla et al. 2016)	Plasma	SD	24	46.25	65.8937	10	37.2857	26.9412	0.899793
VEGF	53	12.5834	17.2255	4-6	(Singla et al. 2016)	Plasma	SD	26	40.2473	60.6085	27	52.8307	64.7818	0.887203
VEGF	12	44.7619	39.0899	7-10	(Singla et al. 2016)	Plasma	SD	3	50.9524	52.549	9	95.7143	73.9458	0.621709
IFN-a2	34	-26.8852	27.6493	1-3	(Singla et al. 2016)	Plasma	SD	24	71.0526	90.9777	10	44.1675	64.7775	0.809766
IFN-a2	31	-17.4081	15.4035	4-6	(Singla et al. 2016)	Plasma	SD	16	40.0748	55.6941	15	22.6667	25.5152	0.776284
IFN-a2	12	-9.59064	23.3288	7-10	(Singla et al. 2016)	Plasma	SD	3	28.0702	36.9522	9	18.4795	28.3142	0.836778
IFN-g	31	-9.44114	5.11235	1-3	(Singla et al. 2016)	Plasma	SD	21	16.8022	21.3715	10	7.36111	6.62312	0.673051
IFN-g	50	1.13194	8.31767	4-6	(Singla et al. 2016)	Plasma	SD	25	14.7639	17.6961	25	15.8958	37.6356	0.978286
IFN-g	11	0.266204	2.10246	7-10	(Singla et al. 2016)	Plasma	SD	3	3.51852	2.97019	8	3.78472	3.44053	0.953297
VEGF	106	137.763	39.1517	1-9	(Thakur et al. 2016)	Sera	SD	58	290.407	167.17	48	428.17	224.61	0.622702
MCP-1	13	419.1	157.212	3-5	(Zhao et al. 2016)	Plasma	SD	10	658.9		3	1078	272.3	0.123777
MCP-1	27	51.4	27.9	6-7	(Zhao et al. 2016)	Plasma	SD	18	534.9		9	586.3	83.7	0.539151
MCP-1	30	331.2	50.836	8-10	(Zhao et al. 2016)	Plasma	SD	19	367.4	178.6	11	698.6	99.8	0.105484
MCP-1	11	214	71.0804	14-17	(Zhao et al. 2016)	Plasma	SD	6	269.9	63.2	5	483.9	148.1	0.183842
RANTES	13	-94.7	44.7822	3-5	(Zhao et al. 2016)	Plasma	SD	10	282.1	107.8	3	187.4	50.3	0.425985
RANTES	27	-181.1	17.1972	6-7	(Zhao et al. 2016)	Plasma	SD	18	298.7	52.4	9	117.6	35.9	0.00435616
RANTES	30	-171.3	17.2724	8-10	(Zhao et al. 2016)	Plasma	SD	19	274.2	51.2	11	102.9	42	0.0096892
RANTES	11	-310.4	89.4463	14-17	(Zhao et al. 2016)	Plasma	SD	6	528.6	135.6	5	218.2	157.1	0.134731
Eotaxin-1	13	-10.2	25.1147	3-5	(Zhao et al. 2016)	Plasma	SD	10	114.9		3	104.7	43.5	0.81461
Eotaxin-1	27	39.9	6.06667	6-7	(Zhao et al. 2016)	Plasma	SD	18	100.9		9	140.8	18.2	0.0283573
Eotaxin-1	30	14.7	0	8-10	(Zhao et al. 2016)	Plasma	SD	19	124.8		11	139.5
Eotaxin-1	11	33.5	14.4547	14-17	(Zhao et al. 2016)	Plasma	SD	6	93.7	12.9	5	127.2	30.1	0.306323
CXCL10	13	1081.1	153.845	3-5	(Zhao et al. 2016)	Plasma	SD	10	9270.2	486.5	3	10351.3		0.0262698
CXCL10	27	729.8	268.908	6-7	(Zhao et al. 2016)	Plasma	SD	18	8243.2	486.5	9	8973	729.7	0.405326
CXCL10	30	3972.9	269.896	8-10	(Zhao et al. 2016)	Plasma	SD	19	5891.9	810.8	11	9864.8	648.6	0.000130068
CXCL10	11	3243.2	761.471	14-17	(Zhao et al. 2016)	Plasma	SD	6	1081.1		5	4324.3	1702.7	0.0568139
IL-1a	13	-79.8049	22.2085	3-5	(Zhao et al. 2016)	Plasma	SD	10	279.451	70.2295	3	199.646		0.255812
IL-1a	27	56.9281	0	6-7	(Zhao et al. 2016)	Plasma	SD	18	166.398		9	223.327
IL-1a	30	78.1227	24.6322	8-10	(Zhao et al. 2016)	Plasma	SD	19	131.812	76.995	11	209.935	56.9393	0.414613
IL-1a	11	81.405	51.2921	14-17	(Zhao et al. 2016)	Plasma	SD	6	75.923	33.1792	5	157.328	110.621	0.480892
IL-1ra	13	56.2	16.8857	3-5	(Zhao et al. 2016)	Plasma	SD	10	55.5	8.2	3	111.7	28.9	0.0613744
IL-1ra	27	-27.9	11.8316	6-7	(Zhao et al. 2016)	Plasma	SD	18	140.6	22.3	9	112.7	31.8	0.472551
IL-1ra	30	33.5	7.30028	8-10	(Zhao et al. 2016)	Plasma	SD	19	82.4	18.5	11	115.9	19.7	0.215123
IL-1ra	11	5.7	15.3	14-17	(Zhao et al. 2016)	Plasma	SD	6	100	24.1	5	105.7	26.2	0.872787
IL-6	13	3.03802	1.67445	3-5	(Zhao et al. 2016)	Plasma	SD	10	2.4228	0.505875	3	5.46082	2.88696	0.299954
IL-6	27	1.52665	0.277842	6-7	(Zhao et al. 2016)	Plasma	SD	18	2.07802	0.366749	9	3.60467	0.792156	0.0803141
IL-6	30	0.340009	0.122653	8-10	(Zhao et al. 2016)	Plasma	SD	19	1.62841	0.352313	11	1.96842	0.305973	0.466217
IL-6	11	-0.675117	0.481274	14-17	(Zhao et al. 2016)	Plasma	SD	6	2.2744	1.07907	5	1.59928	0.433361	0.561525
IL-8	13	21.6	10.4026	3-5	(Zhao et al. 2016)	Plasma	SD	10	15.3	5.1	3	36.9	17.8	0.243394
IL-8	27	13.6	3.20927	6-7	(Zhao et al. 2016)	Plasma	SD	18	15.7	6.9	9	29.3	8.3	0.207664
IL-8	30	8.1	1.02484	8-10	(Zhao et al. 2016)	Plasma	SD	19	7.6	2.1	11	15.7	3	0.0269718
IL-8	11	10.2	3.73894	14-17	(Zhao et al. 2016)	Plasma	SD	6	3.9	1.1	5	14.1	8.3	0.223124
IL-10	13	69.1	83.1074	3-5	(Zhao et al. 2016)	Plasma	SD	10	137.1	33.1	3	206.2	142.8	0.637358
IL-10	27	35.6	36.3795	6-7	(Zhao et al. 2016)	Plasma	SD	18	190.5	42.1	9	226.1	105	0.752994
IL-10	30	350.8	43.7922	8-10	(Zhao et al. 2016)	Plasma	SD	19	22	4.6	11	372.8	145.2	0.0157453
IL-10	11	6.3	2.11471	14-17	(Zhao et al. 2016)	Plasma	SD	6	4	1.2	5	10.3	4.6	0.1851
TNF-a	13	13.9506	2.85352	3-5	(Zhao et al. 2016)	Plasma	SD	10	27.1605	2.83951	3	41.1111	4.69136	0.0109595
TNF-a	27	12.8395	1.06082	6-7	(Zhao et al. 2016)	Plasma	SD	18	25.8025	2.34568	9	38.642	2.71605	0.000346619
TNF-a	30	9.25926	1.6279	8-10	(Zhao et al. 2016)	Plasma	SD	19	26.5432	2.46914	11	35.8025	5.06173	0.100158
TNF-a	11	8.02469	4.34011	14-17	(Zhao et al. 2016)	Plasma	SD	6	16.6667	2.71605	5	24.6914	9.38272	0.411341
MIF	13	82.9	42.0888	3-5	(Zhao et al. 2016)	Plasma	SD	10	75.6		3	158.5	72.9	0.255465
MIF	27	27	10.9	6-7	(Zhao et al. 2016)	Plasma	SD	18	89.9		9	116.9	32.7	0.408981
MIF	30	54.7	9.07549	8-10	(Zhao et al. 2016)	Plasma	SD	19	105.1		11	159.8	30.1	0.0691749
MIF	11	71.4	29.4714	14-17	(Zhao et al. 2016)	Plasma	SD	6	88.4		5	159.8	65.9	0.278604
IFN-a2	13	85.5792	31.1938	3-5	(Zhao et al. 2016)	Plasma	SD	10	53.2085	8.45611	3	138.788	53.8304	0.116291
IFN-a2	27	-6.80394	0	6-7	(Zhao et al. 2016)	Plasma	SD	18	72.646		9	65.8421
IFN-a2	30	28.0056	0	8-10	(Zhao et al. 2016)	Plasma	SD	19	51.4926		11	79.4982
IFN-a2	11	8.50693	19.8178	14-17	(Zhao et al. 2016)	Plasma	SD	6	75.6843	21.8881	5	84.1912	39.5537	0.850734
IFN-g	13	-14.0709	16.1058	3-5	(Zhao et al. 2016)	Plasma	SD	10	70.696	30.7004	3	56.6252	22.2583	0.710589
IFN-g	27	14.0107	5.68646	6-7	(Zhao et al. 2016)	Plasma	SD	18	27.1476		9	41.1583	17.0594	0.411481
IFN-g	30	18.5376	6.79047	8-10	(Zhao et al. 2016)	Plasma	SD	19	13.197	3.50944	11	31.7346	22.3626	0.412825
IFN-g	11	4.9148	3.29612	14-17	(Zhao et al. 2016)	Plasma	SD	6	8.46653	1.77852	5	13.3813	7.18931	0.506933
sVCAM-1	13	28.2	13.671	3-5	(Zhao et al. 2016)	Plasma	SD	10	219	25.8	3	247.2	19	0.378796
sVCAM-1	27	23.3	5.83909	6-7	(Zhao et al. 2016)	Plasma	SD	18	221.5	14.7	9	244.8	14.1	0.252669
sVCAM-1	30	66.3	6.25299	8-10	(Zhao et al. 2016)	Plasma	SD	19	177.3	18.4	11	243.6	15.3	0.00559585
sVCAM-1	11	72.4	14.5344	14-17	(Zhao et al. 2016)	Plasma	SD	6	52.8		5	125.2	32.5	0.025901
sICAM-1	13	11.9	9.33715	3-5	(Zhao et al. 2016)	Plasma	SD	10	21.2	6.3	3	33.1	15.8	0.484177
sICAM-1	27	-5.1	3.63402	6-7	(Zhao et al. 2016)	Plasma	SD	18	35	11.7	9	29.9	7.1	0.709409
sICAM-1	30	2.4	2.91056	8-10	(Zhao et al. 2016)	Plasma	SD	19	31	7.1	11	33.4	8	0.822464
sICAM-1	11	33.5	6.51918	14-17	(Zhao et al. 2016)	Plasma	SD	6	12.8	3.1	5	46.3	14.3	0.0220516

## Sheet: 2- positive criteria
Biomarkers	1- Significant difference between DF and DHF/DSS/SD in WHO classification 1997 or 2009				2- Significant difference between DF and DHF/DSS/SD in both plasma and sera samples			3- Cytokine levels correlate with severity											4- Individual results agree with combined results
	1997			2009	Sera	Plasma	Both	Sera					Plasma					Correlate	Correlation of cytokine levels with severity	Number of studies that agree or against combined results			Conclusion
	DHF/DSS	DHF	DSS	SD				control	DF	DHF	DF > control	DHF > DF	control	DF	DHF	DF > control	DHF > DF			Total	agree	against
MCP-1	no	insuff.	insuff.	no	no	no	no	84.2	924.7	1290.7	yes	yes	161.4	288.3	455.2	yes	yes	yes	positive	5	4	1	no
MIP-1b	-	-	-	insuff.	-	-	-	102.5	146.9	94.2	yes	no	-	-	-	-	-	no	negative	1	-	-	-
RANTES	no	-	-	yes	no	yes	no	45.7	41.7	21.8	no	no	430.5	319.1	118.4	no	no	yes	negative	3	2	1	no
Eotaxin-1	-	-	-	insuff.	-	-	-	-	-	-	-	-	350	93.7	136.9	no	yes	no	positive	1	-	-	-
C-TACK	-	-	-	-	-	-	-	-	-	-	-	-	2437.5	-	-	-	-	-	-	-	-	-	-
CXCL9	insuff.	-	-	-	-	-	-	-	-	-	-	-	-	59	174.2	-	-	-	positive	1			-
CXCL10	no	-	-	no	no	yes	no	1305.2	141452	227372	yes	yes	2810.4	7379.6	13418.5	yes	yes	yes	positive	5	4	1	no
CXCL11	insuff.	-	-	-	-	-	-	-	-	-	-	-	-	662.6	1128.1	-	-	-	positive	1			-
SDF-1	-	-	-	-	-	-	-	-	-	-	-	-	616.3	-	-	-	-	-	-	-	-	-	-
IL-1a	-	-	-	no	-	-	-	-	-	-	-	-	32.5	161.3	204.3	yes	yes	yes	positive	1	-	-	-
IL-1b	no	no	no	insuff.	no	yes	no	2.7	2.2	2.6	no	yes	4.2	2.2	0.9	no	no	no	positive	4	2	2	no
IL-1ra	-	-	-	no	-	-	-	405.7	-	-	-	-	216.1	94.4	113.5	no	yes	no	positive	1	-	-	-
IL-2	yes	yes	yes	-	yes	-	-	2.5	79	27.6	yes	no	27.5	-	-	-	-	no	negative	2	1	1	no
IL-2r	no	yes	yes	-	no	no	no	377.7	1400	1765.2	yes	yes	375	3137.9	4017.7	yes	yes	yes	positive	4	4	0	yes
IL-3	-	-	-	-	-	-	-	-	-	-	-	-	2500	-	-	-	-	-	-	-	-	-	-
IL-4	no	insuff.	insuff.	-	-	-	-	0.2	10.7	8.9	yes	no	5.9	-	-	-	-	no	negative	2	1	1	no
IL-6	no	insuff.	-	yes	no	no	no	3.6	13.6	14.8	yes	yes	5.2	2.5	3	no	yes	no	positive	10	8	2	no
IL-7	-	-	-	yes	-	-	-	-	-	-	-	-	22.1	7.8	2.6	no	no	yes	negative	1	-	-	-
IL-8	no	insuff.	-	yes	no	yes	no	83.4	147.6	283.7	yes	yes	4.1	13.1	29.4	yes	yes	yes	positive	7	6	1	no
IL-9	insuff.	insuff.	insuff.	-	-	-	-	-	-	-	-	-	145.1	153.1	221.4	yes	yes	yes	positive	1	-	-	-
IL-10	yes	no	no	yes	yes	yes	yes	13.9	22.7	46.6	yes	yes	3.7	45.9	104.6	yes	yes	yes	positive	13	12	1	no
IL-12	no	-	-	insuff.	yes	yes	yes	16.5	52.4	32.9	yes	no	1204	651.3	472.1	no	no	no	negative	5	3	2	no
IL-13	no	-	insuff.	-	-	yes	-	4	-	-	-	-	6.9	11.6	6.7	yes	no	no	negative	3	1	2	no
IL-15	-	-	-	-	-	-	-	-	-	-	-	-	4.9	-	-	-	-	-	-	-	-	-	-
IL-16	-	-	-	-	-	-	-	-	-	-	-	-	909.1	-	-	-	-	-	-	-	-	-	-
IL-17	no	insuff.	insuff.	yes	no	-	-	2.3	30.1	33.7	yes	yes	45.5	-	-	-	-	yes	positive	5	4	1	no
IL-18	yes	-	insuff.	insuff.	yes	yes	yes	15	76	407	yes	yes	66.9	191.2	343.9	yes	yes	yes	positive	3	3	0	yes
IL-18BP	-	-	-	insuff.	-	-	-	-	-	-	-	-	4.4	18.2	15.9	yes	no	no	negative	1	-	-	-
IL-18FP	-	-	-	insuff.	-	-	-	-	-	-	-	-	48.6	65.7	102.9	yes	yes	yes	positive	1	-	-	-
IL-21	no	-	-	-	-	-	-	14.5	148	121.5	yes	no	-	-	-	-	-	no	negative	1	-	-	-
IL-33	-	-	-	insuff.	-	-	-	-	-	-	-	-	38.8	135.5	116.9	yes	no	no	negative	1	-	-	-
TNF-a	yes	no	no	no	yes	no	no	14.7	18.5	35.4	yes	yes	18.9	17.9	17.3	no	no	no	positive	20	15	5	no
TNF-b	-	-	-	-	-	-	-	-	-	-	-	-	-	-	-	-	-	-	-	-	-	-	-
sTNF-R1	no	-	-	insuff.	-	no	-	3050.9	-	-	-	-	-	586.2	943.2	-	-	-	positive	3	3	0	yes
sTNF-R2	no	-	-	insuff.	no	no	no	1812.4	4654.1	10097	yes	yes	1448.8	3393.7	5306.7	yes	yes	yes	positive	5	5	0	yes
MIF	no	-	-	insuff.	no	no	no	800	18666.3	34080.8	yes	yes	690.2	9614.2	8240.3	yes	no	no	positive	4	4	0	yes
TGF-b	no	-	-	no	yes	-	-	35.7	142.4	325.2	yes	yes	-	-	-	-	-	yes	negative	3	1	2	no
sST2	yes	no	yes	no	no	yes	no	273.6	1079.9	3456.8	yes	yes	150.7	6	7.2	no	yes	no	positive	4	4	0	yes
E-selectin	insuff.	-	-	-	-	-	-	69.7	63.9	75.7	no	yes	-	-	-	-	-	no	positive	1	-	-	-
L-Selectin	no	-	-	-	-	-	-	748.3	-	-	-	-	964	1492.6	1313.7	yes	no	no	negative	1	-	-	-
P-Selectin	no	-	-	-	-	-	-	623.9	-	-	-	-	36	46.6	28	yes	no	no	negative	1	-	-	-
VEGF	no	no	yes	no	no	no	no	99.4	241.3	256.2	yes	yes	290.8	477.6	608.1	yes	yes	yes	negative	6	3	3	no
VEGFR1	yes	insuff.	insuff.	-	-	yes	-	219	-	-	-	-	257.9	138.2	233.9	no	yes	no	positive	2	2	0	yes
VEGFR2	yes	insuff.	insuff.	insuff.	-	yes	-	6559	-	-	-	-	14211.1	11724.8	9399.9	no	no	yes	negative	2	2	0	yes
VEGFR2 bound	no	-	-	-	-	yes	-	-	-	-	-	-	-	178.5	67.6	-	-	-	negative	1	-	-	-
sVCAM-1	no	no	no	no	-	no	-	-	-	-	-	-	241.9	998.3	1164.4	yes	yes	yes	positive	4	4	0	yes
sICAM-1	no	-	-	no	no	no	no	215.7	290.8	335.3	yes	yes	16.7	43.6	65.2	yes	yes	yes	positive	5	5	0	yes
IFN-a2	yes	yes	yes	no	yes	no	no	1	1	11.3	no	yes	120.1	58	61.4	no	yes	no	positive	8	6	2	no
IFN-b	no	-	-	-	-	-	-	-	-	-	-	-	-	182.1	64.1	-	-	-	negative	2	2	0	yes
IFN-g	no	yes	no	yes	yes	no	no	33.9	40.7	32.4	yes	no	7	34	37	yes	yes	no	positive	16	6	10	no
sTRAIL	-	-	-	no	no	no	no	51.7	101.7	81.8	yes	no	302.6	695.2	263	yes	no	no	negative	2	2	0	yes
MMP-2	-	-	-	insuff.	-	-	-	571816	690474	843179	yes	yes	-	-	-	-	-	yes	positive	1	-	-	-
MMP-9	insuff.	-	-	-	no	-	-	240.9	277.5	129.7	yes	no	-	-	-	-	-	no	negative	1	-	-	-
key
-	represents data not available
insuff.	represents insufficient data

## Sheet: 3- negative criteria
Biomarkers	a- Without stated days of illness	b- Presence of publication bias											c- Insufficient number of studies to perform one study omitting and publication bias analyses	d- Presence of heterogeneity of combined results
		1-Funnel plot	2-Egger's	3-Begg's		4-Rosenthal's fail safe N	5-Orwin's fail safe N	6-trim and fill	total number of studies	Conclusion	7- mechanism of publication bias			due to single study	subgroup of severity	subgroup of WHO classification	subgroup of types of sample	subgroup of host immune factors	subgroup of serotypes
		assymetry/ small studies effect	bias?	bias?	confidence interval	number of missing studies	number of missing studies	unbiased estimate			multiple publication	reviewer bias (time lag bias)
MCP-1	with	0	no	no	0.2 (-0.6- 1.0)	226^	0^	76.6 (-419.4- 572.7)	5	no	no	CS	-	no	91.5- 99.7	86.0- 90.0	60.1- 99.4	0.0- 0.0	98.9- 99.8
MIP-1b	without	-	-	-	-	-	-	-	1	-	-	-	insuff.	-	-	-	-	-	73.2- 94.7
RANTES	without	yes	no	no	0.3 (-0.9- 1.6)	157^	1^	NA	3	no	no	no	-	no	96.4- 99.1	91.8- 93.1	-	37.8- 90.6	-
Eotaxin-1	without	-	-	-	-	-	-	-	1	-	-	-	insuff.	-	22.4- 22.4	-	-	-	-
C-TACK	-	-	-	-	-	-	-	-	-	-	-	-	-	-	-	-	-	-	-
CXCL9	with	-	-	-	-	-	-	-	1	-	-	-	insuff.	-	-	-	-	-	-
CXCL10	with	yes	no	no	0.2 (-0.6- 1.0)	261^	0^	NA	5	no	no	no	-	no	99.6- 99.9	96.2- 99.0	85.9- 96.5	99.3- 99.7	-
CXCL11	with	-	-	-	-	-	-	-	1	-	-	-	insuff.	-	-	-	-	-	-
SDF-1	-	-	-	-	-	-	-	-	-	-	-	-	-	-	-	-	-	-	-
IL-1a	without	-	-	-	-	-	-	-	1	-	-	-	insuff.	-	0.9- 96.7	-	98.9	-	-
IL-1b	with	yes	no	no	0.8 (0.0- 1.6)	21^	0^	-0.6 (-2.4- 1.3)	4	no	no	NA	-	no	96.3- 98.8	0.0- 96.2	99.9	-	-
IL-1ra	without	-	-	-	-	-	-	-	1	-	-	-	insuff.	-	0.0- 98.6	-	0.0- 97.9	-	-
IL-2	without	-	-	-	-	-	-	-	2	-	-	-	insuff.	-	35.5- 62.4	0.0- 52.9	7.5	-	-
IL-2r	with	yes	no	no	0.7 (-0.3- 1.6)	334^	0^	NA	4	no	OC, OD	CS	-	no	99.0- 99.8	54.1- 67.8	98.8	-	-
IL-3	-	-	-	-	-	-	-	-	-	-	-	-	-	-	-	-	-	-	-
IL-4	without	-	-	-	-	-	-	-	2	-	-	-	insuff.	-	96.6- 99.9	-	-	-	-
IL-6	with	yes	no	no	0.4 (-0.1- 0.9)	17^	0^	*1.3 (0.4- 2.3)	10#	yes	OC	no	-	no	96.1- 98.5	93.0- 95.8	98.8- 93.4	97.6- 98.7	99.5- 99.8
IL-7	without	-	-	-		-	-		1	-	-	-	insuff.	-	39.1- 51.7	-	-	19.2- 93.1	-
IL-8	with	yes	no	no	0.2 (-0.4- 0.9)	1034	0^	9.8 (-88.7- 108.2)	7	no	no	CE	-	no	99.4- 99.7	96.3- 97.7	77.5- 99.8	97.4- 99.0	96.0- 98.1
IL-9	without	-	-	-		-	-		1	-	-	-	insuff.	-	-	-	-	-	-
IL-10	with	yes	*	*	0.6 (0.2- 1.0)	3368	0^	*15.5 (-26.2- 57.3)	13#	yes	OC, OD	no	-	no	98.3- 99.0	91.3- 98.9	91.1- 99.7	90.8- 97.8	82.2- 93.6
IL-12	with	yes	no	no	-0.6 (-1.4- 0.2)	60^	12^	NA	5	no	no	CS	-	no	98.5- 99.4	-	98.3- 99.7	96.2- 97.7	97.6- 99.9
IL-13	with	yes	no	no	1.0 (-0.3- 2.3)	26^	2^	NA	3	no	no	no	-	no	75.9- 90.2	-	-	-	-
IL-15	-	-	-	-	-	-	-	-	-	-	-	-	-	-	-	-	-	-	-
IL-16	-	-	-	-	-	-	-	-	-	-	-	-	-	-	-	-	-	-	-
IL-17	with	yes	no	no	-0.2 (-1.0- 0.6)	148^	0^	2.6 (-27.9- 33.2)	5	no	no	CS	-	no	99.4- 99.9	96.8- 97.5	67.5- 85.0	96.0- 96.8	0.0- 99.9
IL-18	without	0	no	no	-0.3 (-1.6- 0.9)	43^	0^	NA	3	no	no	no	-	no	2.7- 95.6	-	-	-	-
IL-18BP	without	-	-	-	-	-	-	-	1	-	-	-	insuff.	-	-	-	-	-	-
IL-18FP	without	-	-	-	-	-	-	-	1	-	-	-	insuff.	-	-	-	-	-	-
IL-21	without	-	-	-	-	-	-	-	1	-	-	-	insuff.	-	0.0- 59.7	-	-	0.0- 87.2	-
IL-33	without	-	-	-	-	-	-	-	1	-	-	-	insuff.	-	-	-	-	-	-
TNF-a	with	yes	*	*	0.3 (0.0- 0.7)	785^	0^	*1.9 (-5.7- 9.5)	20#	yes	OC	CE, CS	-	no	99.3- 99.6	93.9- 99.9	99.8- 99.9	99.9- 100.0	99.4- 100.0
sTNF-R1	with	0	no	no	0.3 (-0.9- 1.6)	178^	0^	NA	3	no	no	no	-	no	98.8- 99.9	-	99.7	-	-
sTNF-R2	with	yes	no	no	0.4 (-0.4- 1.2)	414^	0^	1353.9 (-2724.6- 5432.3)	5	no	OC, OD	CS	-	no	99.8- 99.8	-	91.9	-	-
MIF	with	yes	*	*	1.0 (0.0- 2.0)	4^	0^	41.4 (-25.5- 108.2)	4	yes	no	CE	-	no	95.9- 97.1	95.5	-	-	-
TGF-b	with	yes	no	no	0.3 (-0.9- 1.6)	33^	1^	0.1 (-92.4- 92.6)	3	no	no	NA	-	no	97.6- 99.3	22.3- 98.6	-	89.6- 96.2	0.0- 93.5
sST2	with	yes	*	*	1.0 (0.0- 2.0)	631^	0^	*84.0 (-812.5- 980.4)	4	yes	-	NA	-	no	99.0- 99.3	0.0- 94.3	88.7	-	-
E-selectin	with	-	-	-	-	-	-	-	1	-	-	-	insuff.	-	-	-	95.6	-	-
L-Selectin	with	-	-	-	-	-	-	-	1	-	-	-	insuff.	-	0.0- 88.8	-	-	0.0- 0.0	-
P-Selectin	with	-	-	-	-	-	-	-	1	-	-	-	insuff.	-	31.3- 72.0	-	-	0.0- 77.8	-
VEGF	with	yes	no	no	0.3 (-0.4- 1.0)	28^	28^	-16.8 (-808.7- 775.1)	6	no	no	no	-	no	99.9- 99.9	97.5- 99.9	99.8- 99.9	-	-
VEGFR1	with	-	-	-	-	-	-	-	2	-	-	-	insuff.	-	98.7- 99.6	-	-	-	-
VEGFR2	with	-	-	-	-	-	-	-	2	-	-	-	insuff.	-	98.1- 99.9	-	98.1	-	-
VEGFR2 bound	with	-	-	-	-	-	-	-	1	-	-	-	insuff.	-	0.0- 96.5	-	-	-	-
sVCAM-1	with	yes	no	no	0.0 (-1.0- 1.0)	801^	0^	NA	4	no	OC, OD	no	-	no	100.0- 100.0	0.0- 97.1	97.8	98.7- 99.6	95.0- 96.7
sICAM-1	without	yes	*	no	0.6 (-0.2- 1.4)	67^	0^	57.6 (23.4- 91.8)	5	yes	no	no	-	no	98.6- 99.5	50.0- 97.2	99.6	-	-
IFN-a2	with	0	no	*	0.6 (0.0- 1.1)	32^	0^	-2.1 (-15.6- 11.3)	8	no	OC, OD	no	-	no	98.5- 99.6	0.0- 84.3	99.9	96.9- 97.2	-
IFN-b	with	-	-	-	-	-	-	-	2	-	-	-	insuff.	-	72.3- 98.8	-	-	0.0- 0.0	-
IFN-g	with	yes	no	no	-0.1 (-0.5- 0.2)	42^	0^	NA	16#	no	OC, OD	no	-	no	99.6- 99.8	92.4- 99.8	97.5- 99.8	99.1- 99.4	90.3- 98.1
sTRAIL	without	-	-	-	-	-	-	-	2	-	-	-	insuff.	-	96.1- 98.2	-	-	-	-
MMP-2	without	-	-	-	-	-	-	-	1	-	-	-	insuff.	-	-	-	-	-	-
MMP-9	without	-	-	-	-	-	-	-	1	-	-	-	insuff.	-	-	-	97.8	-	-
key
-	represents data not available
insuff.	represents insufficient data
*	represents statistically significant
^	represents low number of missing studies which indicates modest or substantial impact of bias
#	represents high power of analysis of publication bias (n > 9)
OC	represents presence of overlap co-authors in different studies
OD	represents presence of overlap study duration in studies with overlap co-authors
CE	represents publication interval correlates moderately or strongly with the effect size
CS	represents publication interval correlates moderately or strongly with the significant value

## Sheet: 4- biomarkers DHF vs DF
Biomarkers	Total	Mean difference	Combined std	day	Study Name	Sera/ plasma	SDI (DHF/DSS/SD)	DF			SDI (DHF/DSS/SD)			model	Q (p-value)	I^2	subgroup DHF vs DF (p-value)	lower limit	upper limit
								n	es	se	n	es	se
MCP-1	14	70.6522	72.5343	D -3 (2)	(Dejnirattisai et al., 2008)	Plasma	DHF/DSS	6	206.522	103.347	8	277.174	166.88
MCP-1	23	146.377	82.0299	D -2 (3)	(Dejnirattisai et al., 2008)	Plasma	DHF/DSS	8	184.783	116.635	15	331.159	274.639
MCP-1	28	21.7391	56.1517	D -1 (4)	(Dejnirattisai et al., 2008)	Plasma	DHF/DSS	7	231.366	86.2093	21	253.106	209.564
MCP-1	34	-19.5158	29.741	D 0 (5)	(Dejnirattisai et al., 2008)	Plasma	DHF/DSS	12	105.978	83.8277	22	86.4625	81.0964
MCP-1	28	-11.4734	37.7298	D 1 (6)	(Dejnirattisai et al., 2008)	Plasma	DHF/DSS	10	103.261	90.3984	18	91.7874	104.472
MCP-1	44	1051.7	220.575	NA	(Lee et al. 2006)	Sera	DSS	4	1252	436.3	40	2303.7	206.3
MCP-1	34	-458.958	172.388	2-9	(de-Oliveira-Pinto et al., 2012)	Sera	WS/SD	13	736.014	597.324	21	277.056	218.421
MCP-1	30	260.87	645.978	1-3	(Singla et al. 2016)	Plasma	SD	20	851.087	651.879	10	1111.96	1990.08
MCP-1	43	450.287	467.597	4-6	(Singla et al. 2016)	Plasma	SD	22	613.636	431.245	21	1063.92	2100.97
MCP-1	12	278.986	578.855	7-10	(Singla et al. 2016)	Plasma	SD	3	485.507	232.449	9	764.493	1689.25
MCP-1	13	419.1	157.212	3-5	(Zhao et al. 2016)	Plasma	SD	10	658.9		3	1078	272.3
MCP-1	27	51.4	27.9	6-7	(Zhao et al. 2016)	Plasma	SD	18	534.9		9	586.3	83.7
MCP-1	30	331.2	50.836	8-10	(Zhao et al. 2016)	Plasma	SD	19	367.4	178.6	11	698.6	99.8
MCP-1	11	214	71.0804	14-17	(Zhao et al. 2016)	Plasma	SD	6	269.9	63.2	5	483.9	148.1
MCP-1					DF			158	346.904	45.959				Random	0	91.478		256.825	436.983
MCP-1	371				SDI						213	643.774	196.183	Random	0	99.678	0.140659	259.264	1028.29
MCP-1					Day-matched comparison DF			43	149.323	14.107				Fixed	0.005	72.834		121.675	176.971
MCP-1					Day-matched comparison SDI						84	190.132	42.741	Random	0	86.437	0.364572	106.362	273.903
MCP-1	127	38.679	21.956		SDI vs DF									Random	0	96.294		-4.354	81.712
MCP-1	34	1042.1	221.3	NA	(Lee et al. 2006)		DHF	4	1252	436.3	30	2294.1	204.7				0.031
MCP-1	14	1080.3	227.9	NA	(Lee et al. 2006)		DSS	4	1252	436.3	10	2332.3	208.4				0.025
MCP-1					DF		SD	111	507	76.5				Random	0	86.04		357	657
MCP-1					SD		SD				89	611.1	80.9	Random	0	90.01	0.35	452.6	769.6
MCP-1	200	183.9	81.6		SD vs DF		SD							Random	0	99.39		24.1	343.8
MCP-1					DF	Sera		17	924.7	131.9				Fixed	0.06	71.82		666.1	1183.3
MCP-1					SDI	Sera					61	1290.7	1013.3	Random	0	99.92	0.72	-695.3	3276.7
MCP-1	78	296.3	755.4		SDI vs DF	Sera								Random	0	99.91		-1184.2	1776.7
MCP-1					DF	Plasma		141	288.3	42.2				Random	0	90.64		205.6	371
MCP-1					SDI	Plasma					152	455.2	93.1	Random	0	97.96	0.102	272.8	637.6
MCP-1	293	166	37.3		SDI vs DF	Plasma								Random	0	99.21		92.9	239
MIP-1b	40	-52.6235	25.8226	2-9	(de-Oliveira-Pinto et al., 2012)	Sera	WS/SD	21	146.851	95.5221	19	94.2275	66.4372
RANTES	26	-14.6673	7.69693	1-3	(Perez et al. 2004)	Sera	DHF/DSS	21	46.9916	28.7081	5	32.3243	9.99927
RANTES	26	-25.3847	7.84694	4-5	(Perez et al. 2004)	Sera	DHF/DSS	21	41.2766	32.6727	5	15.8919	7.32826
RANTES	25	-20.2492	12.3988	6	(Perez et al. 2004)	Sera	DHF/DSS	20	36.3574	29.567	5	16.1081	23.4541
RANTES	43	9184.21	11768.5	2-9	(de-Oliveira-Pinto et al., 2012)	Sera	WS/SD	22	46316.6	40888.2	21	55500.8	36230
RANTES	13	-94.7	44.7822	3-5	(Zhao et al. 2016)	Plasma	SD	10	282.1	107.8	3	187.4	50.3
RANTES	27	-181.1	17.1972	6-7	(Zhao et al. 2016)	Plasma	SD	18	298.7	52.4	9	117.6	35.9
RANTES	30	-171.3	17.2724	8-10	(Zhao et al. 2016)	Plasma	SD	19	274.2	51.2	11	102.9	42
RANTES	11	-310.4	89.4463	14-17	(Zhao et al. 2016)	Plasma	SD	6	528.6	135.6	5	218.2	157.1
RANTES					DF			137	206.781	43.709				Random	0	99.139		121.113	292.448
RANTES					SDI						64	79.773	18.093	Random	0	96.376	0.00725661	44.311	115.235
RANTES	201	-111.12	26.002		SDI vs DF									Random	0	99.829		-162.083	-60.158
RANTES					DF		SD	75	331.3	39.3				Random	0	91.8		254.4	408.2
RANTES					SD		SD				49	149.8	43.3	Random	0	93.13	0.002	65	234.7
RANTES	124	-176.7	16.2		SD vs DF		SD							Random	0	95.95		-208.5	-145
RANTES					DF	Sera		84	41.71	14.533				Random	0	89.844		13.225	70.194
RANTES					SDI	Sera					36	21.834	15.805	Random	0	94.852	0.354596	-9.143	52.811
RANTES	120	-20.022	5.128		SDI vs DF	Sera								Random	0	94.128		-30.073	-9.971
RANTES					DF	Plasma		53	319.132	26.779				Random	0	85.662		266.647	371.618
RANTES					SDI	Plasma					28	118.386	8.274	Fixed	0.027	67.269	7.93365e-13	102.169	134.602
RANTES	81	-175.35	14.069		SDI vs DF	Plasma								Random	0	95.813		-202.924	-147.775
Eotaxin-1	13	-10.2	25.1147	3-5	(Zhao et al. 2016)	Plasma	SD	10	114.9		3	104.7	43.5
Eotaxin-1	27	39.9	6.06667	6-7	(Zhao et al. 2016)	Plasma	SD	18	100.9		9	140.8	18.2
Eotaxin-1	30	14.7	0	8-10	(Zhao et al. 2016)	Plasma	SD	19	124.8		11	139.5
Eotaxin-1	11	33.5	14.4547	14-17	(Zhao et al. 2016)	Plasma	SD	6	93.7	12.9	5	127.2	30.1
Eotaxin-1					DF	Plasma	SD	53	93.7	12.9
Eotaxin-1					SDI	Plasma	SD				28	136.94	5.401	Fixed	0.276	22.369	0.00198893	126.354	147.527
Eotaxin-1	81	22.114	11.381		SDI vs DF	Plasma	SD							Random	0	96.123		-0.193	44.421
CXCL9	18	115.231	38.2157	D -2 (3)	(Dejnirattisai et al., 2008)	Plasma	DHF/DSS	5	59	46.422	13	174.231	115.684
CXCL10	15	38461.5	14565.1	D -3 (2)	(Dejnirattisai et al., 2008)	Plasma	DHF/DSS	6	53846.2	18772.3	9	92307.7	37157.4
CXCL10	23	44299.5	10266.8	D -2 (3)	(Dejnirattisai et al., 2008)	Plasma	DHF/DSS	7	39194.1	12796.1	16	83493.6	36225.2
CXCL10	29	44422.2	12940.2	D -1 (4)	(Dejnirattisai et al., 2008)	Plasma	DHF/DSS	7	48351.6	24790.5	22	92773.9	41861.4
CXCL10	42	7051.28	13259.5	D 0 (5)	(Dejnirattisai et al., 2008)	Plasma	DHF/DSS	12	65598.3	35368.4	30	72649.6	46336.9
CXCL10	41	3680.73	12291.6	D 1 (6)	(Dejnirattisai et al., 2008)	Plasma	DHF/DSS	10	57692.3	32775.3	31	61373	36789.5
CXCL10	9	9583.53	1808.1	5	(Ferreira et al. 2015)	Plasma	DHF/DSS	3	3324.29	2636.98	6	12907.8	2389.13
CXCL10	11	3916.99	2692.49	6	(Ferreira et al. 2015)	Plasma	DHF/DSS	3	9456.7	3312.98	8	13373.7	5359.75
CXCL10	26	7455.06	1444.73	7	(Ferreira et al. 2015)	Plasma	DHF/DSS	6	2441.91	1600.51	20	9896.96	5762.47
CXCL10	38	4311.15	1816.23	8	(Ferreira et al. 2015)	Plasma	DHF/DSS	11	5328.16	4482.16	27	9639.31	6305.08
CXCL10	19	5926.75	1562.36	9	(Ferreira et al. 2015)	Plasma	DHF/DSS	5	3398.13	1012.96	14	9324.88	5594.69
CXCL10	24	3045.11	1314.91	10	(Ferreira et al. 2015)	Plasma	DHF/DSS	5	3314.9	1686.76	19	6360.01	4694.6
CXCL10	17	1131.26	1703.44	11	(Ferreira et al. 2015)	Plasma	DHF/DSS	3	2904.39	1991.3	14	4035.65	4703.1
CXCL10	10	2739.78	2530.6	12	(Ferreira et al. 2015)	Plasma	DHF/DSS	4	1385.21	691.381	6	4124.99	6140.58
CXCL10	62	-5.54143e+06	860192	2-3	(Kumar et al. 2012)	Sera	DHF/DSS	44	6.18113e+06	5.69434e+06	18	639702	231902
CXCL10	62	-70827.6	15805.3	4-7	(Kumar et al. 2012)	Sera	DHF/DSS	44	167453	24676.2	18	96625.1	65172.5
CXCL10	108	1.05584	0.447742	1-7	(Conroy et al. 2015)	Sera	DHF/DSS	63	2.76626	2.13897	45	3.82211	2.3986
CXCL10	13	1081.1	153.845	3-5	(Zhao et al. 2016)	Plasma	SD	10	9270.2	486.5	3	10351.3
CXCL10	27	729.8	268.908	6-7	(Zhao et al. 2016)	Plasma	SD	18	8243.2	486.5	9	8973	729.7
CXCL10	30	3972.9	269.896	8-10	(Zhao et al. 2016)	Plasma	SD	19	5891.9	810.8	11	9864.8	648.6
CXCL10	11	3243.2	761.471	14-17	(Zhao et al. 2016)	Plasma	SD	6	1081.1		5	4324.3	1702.7
CXCL10					DF			286	18648.5	1603.5				Random	0	99.853		15505.6	21791.3
CXCL10	617				SDI						331	19572.9	1901.38	Random	0	99.637	0.710124	15846.3	23299.6
CXCL10					Day-matched comparison DF			82	9192.83	1342.12				Random	0	94.676		6562.31	11823.3
CXCL10					Day-matched comparison SDI						222	26233.4	2879.86	Random	0	96.695	8.17053e-08	20589	31877.8
CXCL10	304	11899	1308.66		SDI vs DF									Random	0	98.778		9334.05	14463.9
CXCL10					DF		SD	53	7805.6	861				Random	0	99		6118.1	9493.1
CXCL10					SD		SD				28	7952.8	895.6	Random	0	96.22	0.906	6197.4	9708.2
CXCL10	81	2252.6	864		SD vs DF		SD							Random	0	99.89		559.1	3946.1
CXCL10					DF	Sera		151	141452	84365.7				Random	0	99.9		-23901.6	306806
CXCL10					SDI	Sera					81	227372	81796.3	Random	0	98.87	0.465	67053.9	387690
CXCL10	232	-937376	56692.2		SDI vs DF	Sera								Random	0	99.95		-1.04849e+06	-826261
CXCL10					DF	Plasma		135	7379.6	860.2				Random	0	98.36		5693.7	9065.6
CXCL10					SDI	Plasma					250	13418.5	1129.1	Random	0	96.41	0	11205.5	15631.5
CXCL10	385	7290.7	560.7		SDI vs DF	Plasma								Random	0	99.62		6191.7	8389.7
CXCL11	21	465.517	130.967	D -2 (3)	(Dejnirattisai et al., 2008)	Plasma	DHF/DSS	7	662.562	122.667	14	1128.08	458.3
IL-1a	13	-79.8049	22.2085	3-5	(Zhao et al. 2016)	Plasma	SD	10	279.451	70.2295	3	199.646
IL-1a	27	56.9281	0	6-7	(Zhao et al. 2016)	Plasma	SD	18	166.398		9	223.327
IL-1a	30	78.1227	24.6322	8-10	(Zhao et al. 2016)	Plasma	SD	19	131.812	76.995	11	209.935	56.9393
IL-1a	11	81.405	51.2921	14-17	(Zhao et al. 2016)	Plasma	SD	6	75.923	33.1792	5	157.328	110.621
IL-1a					DF	Plasma		53	161.257	55.89				Random	0	96.736		51.715	270.8
IL-1a					SDI	Plasma					28	204.251	16.209	Fixed	0.315	0.938	0.460018	172.483	236.02
IL-1a	81	26.262	60.448		SDI vs DF	Plasma								Random	0	99.548		-92.215	144.738
IL-1b	18	0.336364	0.212625	D -2 (3)	(Chunhakan et al. 2015)	Plasma	DSS	7	0.5	0.2	11	0.836364	0.659124
IL-1b	55	-1.71053	0.673785	D -1 (4)	(Chunhakan et al. 2015)	Plasma	DSS	17	2.7	2.7	38	0.989474	0.977837
IL-1b	101	-1.05538	0.313271	D 0 (5)	(Chunhakan et al. 2015)	Plasma	DSS	36	2.1	1.7	65	1.04462	1.07749
IL-1b	97	-1.30299	0.265711	D 1 (6)	(Chunhakan et al. 2015)	Plasma	DSS	30	2.4	1.2	67	1.09701	1.2306
IL-1b	29	-1.36316	0.490382	D 2 (7)	(Chunhakan et al. 2015)	Plasma	DSS	10	2.1	1.5	19	0.736842	0.54223
IL-1b	36	-0.7	0.241209	4	(Kamaladasa et al. 2016)	Sera	DHF/DSS	11	0.9	0.8	25	0.2	0
IL-1b	36	2.8	0.28	4.5	(Kamaladasa et al. 2016)	Sera	DHF/DSS	11	0	0	25	2.8	1.4
IL-1b	36	-1.2	0.860887	5	(Kamaladasa et al. 2016)	Sera	DHF/DSS	11	3	2.7	25	1.8	1.4
IL-1b	36	3.9	0.26	5.5	(Kamaladasa et al. 2016)	Sera	DHF/DSS	11	0	0	25	3.9	1.3
IL-1b	36	3.4	0.38	6	(Kamaladasa et al. 2016)	Sera	DHF/DSS	11	0	0	25	3.4	1.9
IL-1b	36	8.4	0.933011	6.5	(Kamaladasa et al. 2016)	Sera	DHF/DSS	11	1.5	1.2	25	9.9	4.3
IL-1b	36	0.8	0.14	7	(Kamaladasa et al. 2016)	Sera	DHF/DSS	11	0	0	25	0.8	0.7
IL-1b	62	-1.6	0.0765414	2-3	(Kumar et al. 2012)	Sera	DHF/DSS	44	3.3	0.4	18	1.7	0.2
IL-1b	62	-1	0.0653275	4-7	(Kumar et al. 2012)	Sera	DHF/DSS	44	2.4	0.3	18	1.4	0.2
IL-1b	37	1.6	6.73059	3-6	(Guerrero et al. 2013)	Plasma	SD	25	12	18	12	13.6	19.7
IL-1b	71	1.5	0.64906	1-5	(Oliveira et al. 2016)	Sera/plasma	DHF/DSS	44	1.7	2.4	27	3.2	2.8
IL-1b					DF			334	2.11	0.363				Random	0	98.774		1.399	2.821
IL-1b	784				SDI						450	1.972	0.185	Random	0	96.303	0.734825	1.61	2.334
IL-1b					Day-matched comparison DF			177	1.805	0.381				Random	0	93.965		1.059	2.551
IL-1b					Day-matched comparison SDI						375	2.175	0.323	Random	0	96.833	0.458841	1.542	2.808
IL-1b	552	1.014	0.511		SDI vs DF									Random	0	99.946		0.013	2.015
IL-1b	16	0.4	0.2	D -2 (3)	(Chunhakan et al. 2015)	Plasma	DHF	7	0.5	0.2	9	0.9	0.7
IL-1b	49	-1.8	0.7	D -1 (4)	(Chunhakan et al. 2015)	Plasma	DHF	17	2.7	2.7	32	0.9	1
IL-1b	92	-1	0.3	D 0 (5)	(Chunhakan et al. 2015)	Plasma	DHF	36	2.1	1.7	56	1.1	1.1
IL-1b	86	-1.3	0.3	D 1 (6)	(Chunhakan et al. 2015)	Plasma	DHF	30	2.4	1.2	56	1.1	1.3
IL-1b	20	-1.4	0.5	D 2 (7)	(Chunhakan et al. 2015)	Plasma	DHF	10	2.1	1.5	10	0.7	0.6
IL-1b					DF		DHF	100	1.9	0.6				Random	0	96.22		0.8	3
IL-1b					DHF		DHF				163	1	0.1	Fixed	0.461	0	0.097	0.8	1.1
IL-1b	263	-1	0.3		DHF vs DF		DHF							Random	0	99.57		-1.7	-0.4
IL-1b	9	0.1	0.1	D -2 (3)	(Chunhakan et al. 2015)	Plasma	DSS	7	0.5	0.2	2	0.6	0
IL-1b	23	-1.3	0.7	D -1 (4)	(Chunhakan et al. 2015)	Plasma	DSS	17	2.7	2.7	6	1.4	0.7
IL-1b	45	-1.1	0.4	D 0 (5)	(Chunhakan et al. 2015)	Plasma	DSS	36	2.1	1.7	9	1	0.9
IL-1b	41	-1.5	0.3	D 1 (6)	(Chunhakan et al. 2015)	Plasma	DSS	30	2.4	1.2	11	0.9	0.7
IL-1b	19	-1.3	0.5	D 2 (7)	(Chunhakan et al. 2015)	Plasma	DSS	10	2.1	1.5	9	0.8	0.4
IL-1b					DF		DSS	100	1.9	0.6				Random	0	96.22		0.8	3
IL-1b					DSS		DSS				37	0.9	0.1	Fixed	0.295	19.13	0.082	0.7	1.1
IL-1b	137	-1	0.4		DSS vs DF		DSS							Random	0	99.58		-1.8	-0.2
IL-1b	37	1.6	6.73059	3-6	(Guerrero et al. 2013)	Plasma	SD	25	12	18	12	13.6	19.7
IL-1b					DF	Sera		165	2.2	0.4				Random	0	98.09		1.5	2.9
IL-1b					SDI	Sera					211	2.6	0.3	Random	0	97.39	0.316	2.1	3.1
IL-1b	376	1.6	0.5		SDI vs DF	Sera								Random	0	99.98		0.6	2.7
IL-1a					DF	Plasma		125	2.152	0.58				Random	0	95.669		1.015	3.289
IL-1a					SDI	Plasma					212	0.906	0.065	Random	0.051	54.634	0.0327683	0.779	1.033
IL-1a	337	-0.894	0.303		SDI vs DF	Plasma								Random	0	99.472		-1.488	-0.301
IL-1ra	13	56.2	16.8857	3-5	(Zhao et al. 2016)	Plasma	SD	10	55.5	8.2	3	111.7	28.9
IL-1ra	27	-27.9	11.8316	6-7	(Zhao et al. 2016)	Plasma	SD	18	140.6	22.3	9	112.7	31.8
IL-1ra	30	33.5	7.30028	8-10	(Zhao et al. 2016)	Plasma	SD	19	82.4	18.5	11	115.9	19.7
IL-1ra	11	5.7	15.3	14-17	(Zhao et al. 2016)	Plasma	SD	6	100	24.1	5	105.7	26.2
IL-1ra					DF	Plasma	SD	53	94.412	19.678				Random	0	98.647		55.843	132.981
IL-1ra					SDI	Plasma	SD				28	113.451	4.559	Random	0.891	0	0.345905	104.516	122.385
IL-1ra	81	16.802	19.031		SDI vs DF	Plasma	SD							Random	0	99.513		-20.497	54.101
IL-2				1-2	(Kurane et al. 1991)	Sera	DHF/DSS	16	73.5045	89.1623
IL-2	36	-148.494	233.293	3-4	(Kurane et al. 1991)	Sera	DHF/DSS	10	249.811	718.969	26	101.316	266.617
IL-2				5-6	(Kurane et al. 1991)	Sera	DHF/DSS				35	71.6377	209.981
IL-2				7-8	(Kurane et al. 1991)	Sera	DHF/DSS				15	21.922	29.939
IL-2	65	-514.23	248.274	10-20	(Kurane et al. 1991)	Sera	DHF/DSS	31	550.628	1379.41	34	36.3974	94.0648
IL-2	67	107.23	58.9436	3-5	(Senaratne, Carr, and Noordeen 2016)	Plasma	DHF/DSS	24	59.68	101.05	43	166.91	362.08
IL-2					DF			81	68.671	15.085				Fixed	0.199	35.546		39.106	98.237
IL-2					SDI						153	29.668	6.726	Fixed	0.031	62.389	0.0182036	16.486	42.851
IL-2	168	-184.544	208.27	3-20	SDI vs DF									Random	0	99.522		-592.745	223.657
IL-2				1-2	(Kurane et al. 1991)	Sera	DHF	16	73.5045	89.1623
IL-2	14	-115.428	245.24	3-4	(Kurane et al. 1991)	Sera	DHF	10	249.811	718.969	4	134.383	183.857
IL-2				5-6	(Kurane et al. 1991)	Sera	DHF				25	12.2918	33.6007
IL-2				7-8	(Kurane et al. 1991)	Sera	DHF				29	8.44083	7.7953
IL-2				10-20	(Kurane et al. 1991)	Sera	DHF	31	550.628	1379.41
IL-2					DF		DHF	57	78.965	22.105				Fixed	0.12	52.926		35.64	122.29
IL-2					DHF		DHF				58	8.603	1.416	Fixed	0.334	8.843	0.00149028	5.828	11.378
IL-2				1-2	(Kurane et al. 1991)	Sera	DSS	16	73.5045	89.1623
IL-2	13	-238.488	227.384	3-4	(Kurane et al. 1991)	Sera	DSS	10	249.811	718.969	3	11.323	5.90062
IL-2				5-6	(Kurane et al. 1991)	Sera	DSS				22	13.7185	11.2025
IL-2				7-8	(Kurane et al. 1991)	Sera	DSS				26	14.0077	10.5621
IL-2				10-20	(Kurane et al. 1991)	Sera	DSS	31	550.628	1379.41
IL-2					DF		DSS	57	78.965	22.105				Fixed	0.12	52.926		35.64	122.29
IL-2					DSS		DSS				51	13.421	1.424	Fixed	0.787	0	0.00308652	10.63	16.213
IL-2					DF	Sera		57	78.965	22.105				Fixed	0.12	52.926		35.64	122.29
IL-2					SDI	Sera					110	27.602	6.776	Fixed	0.225	31.286	0.026313	14.32	40.883
IL-2	101	-332.12	182.848		SDI vs DF	Sera								Random	0	98.16		-690.497	26.256
IL-2r	16	388.889	176.728	2	(Green et al. 1999)	Plasma	DHF/DSS	7	1117.65	127.073	9	1506.54	510.228
IL-2r	28	385.813	285.543	3	(Green et al. 1999)	Plasma	DHF/DSS	11	1529.41	807.727	17	1915.22	614.653
IL-2r	36	349.3	203.813	4	(Green et al. 1999)	Plasma	DHF/DSS	15	1605.88	581.559	21	1955.18	631.54
IL-2r	37	242.781	227.337	5	(Green et al. 1999)	Plasma	DHF/DSS	15	1917.65	718.222	22	2160.43	616.795
IL-2r	20	847.123	217.507	6	(Green et al. 1999)	Plasma	DHF/DSS	7	1512.61	374.296	13	2359.73	595.682
IL-2r	28	161.893	191.783	13-18	(Green et al. 1999)	Plasma	DHF/DSS	5	1435.29	336.89	23	1597.19	569.103
IL-2r				1-2	(Kurane et al. 1991)	Sera	DHF/DSS	15	1534.92	1056.43
IL-2r	30	813.681	269.423	3-4	(Kurane et al. 1991)	Sera	DHF/DSS	9	1328.04	379.42	21	2141.72	1090.17
IL-2r				5-6	(Kurane et al. 1991)	Sera	DHF/DSS				33	1998.56	971.934
IL-2r				7-8	(Kurane et al. 1991)	Sera	DHF/DSS				15	1660.32	942.915
IL-2r	57	129.101	140.547	10-20	(Kurane et al. 1991)	Sera	DHF/DSS	30	1082.54	468.774	27	1211.64	579.286
IL-2r	41	3381	456.889	6-11	(Libraty et al. 2002)	Plasma	DHF/DSS	12	13273	1377	29	16654	1213
IL-2r	32	70	315.906	5-9	(Valero et al., 2008)	Sera	DHF/DSS	17	1840	855	15	1910	923
IL-2r					DF			143	2486.56	381.262				Random	0	98.951		1739.3	3233.82
IL-2r	325				SDI						245	3338.3	1054.74	Random	0	99.787	0.447587	1271.06	5405.55
IL-2r					Day-matched comparison DF			55	1515.72	166.779				Random	0	87.056		1188.84	1842.6
IL-2r					Day-matched comparison SDI						82	1984.15	129.903	Random	0.005	73.465	0.0267021	1729.55	2238.76
IL-2r	137	441.504	97.039	2-6	SDI vs DF									Random	0	96.169		251.31	631.697
IL-2r				1-2	(Kurane et al. 1991)	Sera	DHF	15	1534.92	1056.43
IL-2r				3-4	(Kurane et al. 1991)	Sera	DHF	9	1328.04	379.42
IL-2r				5-6	(Kurane et al. 1991)	Sera	DHF				20	2247.12	393.235
IL-2r				7-8	(Kurane et al. 1991)	Sera	DHF				25	2028.9	436.034
IL-2r				10-20	(Kurane et al. 1991)	Sera	DHF	30	1082.54	468.774
IL-2r					DF		DHF	54	1183.36	68.604				Fixed	0.113	54.105		1048.9	1317.83
IL-2r					DHF		DHF				45	2137.1	61.913	Fixed	0.078	67.793	0	2015.75	2258.45
IL-2r				1-2	(Kurane et al. 1991)	Sera	DSS	15	1534.92	1056.43
IL-2r				3-4	(Kurane et al. 1991)	Sera	DSS	9	1328.04	379.42
IL-2r				D 0-1 (5-6)	(Kurane et al. 1991)	Sera	DSS				19	2313.04	546.118
IL-2r				D 2-3 (7-8)	(Kurane et al. 1991)	Sera	DSS				23	2081.96	393.242
IL-2r				10-20	(Kurane et al. 1991)	Sera	DSS	30	1082.54	468.774
IL-2r					DF		DSS	54	1183.36	68.604				Fixed	0.113	54.105		1048.9	1317.83
IL-2r					DSS		DSS				42	2151.26	68.603	Fixed	0.123	57.988	0	2016.81	2285.72
IL-2r					DF	Sera		71	1399.97	162.273				Random	0.004	77.604		1081.92	1718.02
IL-2r					SDI	Sera					111	1765.23	209.018	Random	0	83.751	0.167486	1355.56	2174.9
IL-2r	119	337	217.2		SDI vs DF	Sera								Random	0	98.86		-88.7	762.7
IL-2r					DF	Plasma		72	3137.9	659				Random	0	99.36		1846.3	4429.4
IL-2r					SDI	Plasma					134	4017.7	1472.6	Random	0	99.85	0.586	1131.4	6903.9
IL-2r	206	820.3	288		SDI vs DF	Plasma								Random	0	99.68		255.7	1384.8
IL-4	103	0.5	0.295019	NA	(Furuta et al. 2012)	Plasma	DSS	19	6.5	1	84	7	1.7
IL-4	62	-4	0.243294	2-3	(Kumar et al. 2012)	Sera	DHF/DSS	44	13	0.4	18	9	1
IL-4	62	0.5	0.252463	4-7	(Kumar et al. 2012)	Sera	DHF/DSS	44	8.3	0.6	18	8.8	1
IL-4					DF			107	9.271	1.984				Random	0	99.914		5.383	13.158
IL-4					SDI						120	8.26	0.68	Random	0	96.576	0.629771	6.927	9.593
IL-4	227	-1	1.625		SDI vs DF									Random	0	99.988		-4.186	2.186
IL-4	62	0.7	0.3	NA	(Furuta et al. 2012)	Plasma	DHF	19	6.5	1	43	7.2	1.5				0.679
IL-4	60	0.3	0.4	NA	(Furuta et al. 2012)	Plasma	DSS	19	6.5	1	41	6.8	1.9				0.905
IL-4					DF	Sera		88	10.7	2.4				Random	0	99.95		6	15.3
IL-4					SDI	Sera					36	8.9	0.2	Fixed	0.549	0	0.458	8.6	9.2
IL-4	124	-1.8	2.3		SDI vs DF	Sera								Random	0	99.99		-6.2	2.7
IL-6	44	-4.96	7.83376	3	(Eppy et al. 2016)	Sera/plasma	SD	20	19.17	30.47	24	14.21	18.94
IL-6	44	6.26	3.05998	5	(Eppy et al. 2016)	Sera/plasma	SD	20	3.54	2.34	24	9.8	14.77
IL-6	32	686.96	228.955	1-18	(Chen et al. 2006)	Sera	DHF/DSS	12	26.4	8.5	20	713.36	1023.86
IL-6	17	-1.42	1.27965	1-5	(Restrepo et al. 2008)	Sera	DHF/DSS	12	6.07	2.96	5	4.65	2.13
IL-6	70	1.4	0.276559	NA	(Levy et al. 2010)	Sera	DHF	36	3.2	0.933333	34	4.6	1.33333
IL-6	102	17.5962	12.0712	2-5	(Priyadarshini et al. 2010)	Plasma	DHF/DSS	70	6.95122	15.2156	32	24.5474	67.5057
IL-6	108	-1.11166	14.7425	6-15	(Priyadarshini et al. 2010)	Plasma	DHF/DSS	78	18.9357	64.1947	30	17.8241	70.2514
IL-6	62	18.4	8.82087	3-6	(Guerrero et al. 2013)	Plasma	SD	34	15	16.2	28	33.4	44.3
IL-6	30	2.60963	0.655206	NA	(Arias et al. 2014)	Sera	SD	22	5.62567	1.99086	8	8.23529	1.41176
IL-6	83	-7.4	3.6322	0-2	(de la Cruz Hernández et al. 2016)	Sera	DHF/DSS	51	36.4	23	32	29	9.5
IL-6	88	-22.2	20.1519	3-5	(de la Cruz Hernández et al. 2016)	Sera	DHF/DSS	50	49.6	142.3	38	27.4	6.5
IL-6	32	126.266	100.238	1-3	(Singla et al. 2016)	Plasma	SD	22	5.28708	7.33114	10	131.553	316.943
IL-6	42	43.6967	24.238	4-6	(Singla et al. 2016)	Plasma	SD	21	2.6817	2.56713	21	46.3784	111.043
IL-6	10	12.5439	5.47395	7-10	(Singla et al. 2016)	Plasma	SD	3	4.82456	4.13027	7	17.3684	13.0363
IL-6	13	3.03802	1.67445	3-5	(Zhao et al. 2016)	Plasma	SD	10	2.4228	0.505875	3	5.46082	2.88696
IL-6	27	1.52665	0.277842	6-7	(Zhao et al. 2016)	Plasma	SD	18	2.07802	0.366749	9	3.60467	0.792156
IL-6	30	0.340009	0.122653	8-10	(Zhao et al. 2016)	Plasma	SD	19	1.62841	0.352313	11	1.96842	0.305973
IL-6	11	-0.675117	0.481274	14-17	(Zhao et al. 2016)	Plasma	SD	6	2.2744	1.07907	5	1.59928	0.433361
IL-6					DF			504	4.8	0.42				Random	0	96.144		3.976	5.624
IL-6					SDI						341	10.165	1.027	Random	0	98.537	1.32986e-06	8.152	12.178
IL-6					Day-matched comparison DF			40	9.877	7.711				Random	0.022	81.023		-5.235	24.99
IL-6					Day-matched comparison SDI						48	11.472	2.379	Fixed	0.369	0	0.843316	6.811	16.134
IL-6	88	0.702	5.65	3-5	SDI vs DF									Random	0	98.746		-10.372	11.775
IL-6	70	1.4	0.3	NA	(Levy et al. 2010)	Sera	DHF	36	3.2	0.9	34	4.6	1.3				0.39
IL-6					DF		SD	195	3.119	0.33				Random	0	92.951		2.472	3.765
IL-6					SD		SD				150	5.174	0.767	Random	0	95.813	0.0138496	3.671	6.677
IL-6	345	4.157	0.504		SD vs DF		SD							Random	0	99.304		3.169	5.144
IL-6					DF	Sera		183	13.6	2				Random	0	97.85		9.6	17.6
IL-6					SDI	Sera					137	14.8	3.6	Random	0	99.25	0.772	7.8	21.8
IL-6	320	-3.3	1.3		SDI vs DF	Sera								Random	0	99.53		-5.8	-0.8
IL-6					DF	Plasma		281	2.5	0.3				Random	0	86.92		2	3.1
IL-6					SDI	Plasma					156	3	0.5	Random	0	88.52	0.404	2	4.1
IL-6	437	5.8	0.6		SDI vs DF	Plasma								Random	0	99.24		4.7	6.8
IL-7	32	-7.42387	2.00469	1-3	(Singla et al. 2016)	Plasma	SD	22	10.569	8.9288	10	3.14516	1.98743
IL-7	51	-3.67983	1.49959	4-6	(Singla et al. 2016)	Plasma	SD	22	6.82777	6.4614	29	3.14794	3.19066
IL-7	12	-3.24373	3.51885	7-10	(Singla et al. 2016)	Plasma	SD	3	5.10753	6.05287	9	1.8638	1.23656
IL-7					DF	Plasma	SD	47	7.845	1.067				Fixed	0.194	39.102		5.754	9.935
IL-7					SDI	Plasma	SD				48	2.593	0.444	Fixed	0.126	51.73	5.50758e-06	1.723	3.464
IL-7	95	-4.83	1.464		SDI vs DF	Plasma	SD							Random	0	97.59		-7.7	-1.961
IL-8	51	283.636	61.18	D -3 (2)	(Pandey et al. 2015)	Sera	SD	30	189.091	180.219	21	472.727	236.364
IL-8	71	234.604	46.7704	D -2 (3)	(Pandey et al. 2015)	Sera	SD	31	219.941	145.326	40	454.545	245.455
IL-8	62	182.955	37.8125	D -1 (4)	(Pandey et al. 2015)	Sera	SD	24	180.682	124.386	38	363.636	172.727
IL-8	27	50.9091	70.0585	D 0 (5)	(Pandey et al. 2015)	Sera	SD	5	203.636	144.428	22	254.545	127.273
IL-8	107	25.9715	10.6077	2-5	(Priyadarshini et al. 2010)	Plasma	DHF/DSS	75	15.1886	21.0427	32	41.1601	58.4107
IL-8	108	8.07324	12.462	6-15	(Priyadarshini et al. 2010)	Plasma	DHF/DSS	78	21.1271	38.0667	30	29.2004	64.0443
IL-8	63	189.8	186.056	3-6	(Guerrero et al. 2013)	Plasma	SD	35	88.4	295.8	28	278.2	948.3
IL-8	40	246.7	5.72682	NA	(Patra et al. 2015)	Sera	DHF	29	147	16.1	11	393.7	16.2
IL-8	83	-75.6	42.4297	0-2	(de la Cruz Hernández et al. 2016)	Sera	DHF/DSS	51	104.7	302.5	32	29.1	13.9
IL-8	88	-30	26.6194	3-5	(de la Cruz Hernández et al. 2016)	Sera	DHF/DSS	50	65.5	183.3	38	35.5	37.3
IL-8	31	66.431	32.9466	1-3	(Singla et al. 2016)	Plasma	SD	21	15.119	12.392	10	81.55	103.835
IL-8	49	32.0532	11.1449	4-6	(Singla et al. 2016)	Plasma	SD	23	18.2609	16.8492	26	50.3141	53.9304
IL-8	11	34.4097	20.3825	7-10	(Singla et al. 2016)	Plasma	SD	3	11.9444	1.9245	8	46.3542	57.5646
IL-8	13	21.6	10.4026	3-5	(Zhao et al. 2016)	Plasma	SD	10	15.3	5.1	3	36.9	17.8
IL-8	27	13.6	3.20927	6-7	(Zhao et al. 2016)	Plasma	SD	18	15.7	6.9	9	29.3	8.3
IL-8	30	8.1	1.02484	8-10	(Zhao et al. 2016)	Plasma	SD	19	7.6	2.1	11	15.7	3
IL-8	11	10.2	3.73894	14-17	(Zhao et al. 2016)	Plasma	SD	6	3.9	1.1	5	14.1	8.3
IL-8					DF			508	44.23	5.368				Random	0	99.359		33.708	54.751
IL-8	872				SDI						364	139.194	22.561	Random	0	99.743	4.22358e-05	94.975	183.412
IL-8					Day-matched comparison DF			90	197.629	15.462				Fixed	0.741	0		167.324	227.934
IL-8					Day-matched comparison SDI						121	381.116	50.333	Random	0	88.244	0.00049261	282.466	479.767
IL-8	211	188.973	32.768	2-5	SDI vs DF									Random	0	98.861		124.75	253.197
IL-8	40	246.7	5.7	NA	(Patra et al. 2015)	Sera	DHF	29	147	16.1	11	393.7	16.2				0
IL-8					DF		SD	225	16.93	2.475				Random	0	96.327		12.078	21.782
IL-8					SD		SD				221	116.341	11.958	Random	0	97.694	4.44089e-16	92.903	139.779
IL-8	446	88.514	7.372		SD vs DF		SD							Random	0	99.754		74.065	102.963
IL-8					DF	Sera		220	147.6	2.9				Fixed	0	73.7		141.9	153.3
IL-8					SDI	Sera					202	283.7	78.7	Random	0	99.88	0.084	129.4	438
IL-8	422	127.6	62.5		SDI vs DF	Sera								Random	0	99.95		5	250.2
IL-8					DF	Plasma		288	13.1	1.7				Random	0	94.64		9.8	16.4
IL-8					SDI	Plasma					162	29.4	4.4	Random	0	82.14	0.001	20.7	38.1
IL-8	450	24.9	3		SDI vs DF	Plasma								Random	0	98.81		19	30.7
IL-9	103	68.3	9.43152	NA	(Furuta et al. 2012)	Plasma	DHF/DSS	19	153.1	28.4	84	221.4	62.5
IL-9	62	71.6	11.8	NA	(Furuta et al. 2012)	Plasma	DHF	19	153.1	28.4	43	224.7	64.8
IL-9	60	64.8	11.4	NA	(Furuta et al. 2012)	Plasma	DSS	19	153.1	28.4	41	217.9	59.9
IL-10	15	20.1852	21.4141	D -3 (2)	(Green et al. 1999)	Plasma	DHF/DSS	6	37.7778	30.4534	9	57.963	52.3064
IL-10	26	74.2308	31.1391	D -2 (3)	(Green et al. 1999)	Plasma	DHF/DSS	13	32.4359	24.311	13	106.667	109.61
IL-10	35	76.6389	31.4689	D -1 (4)	(Green et al. 1999)	Plasma	DHF/DSS	15	56.7778	48.8294	20	133.417	128.945
IL-10	37	53.7817	27.7948	D 0 (5)	(Green et al. 1999)	Plasma	DHF/DSS	19	89.7368	82.657	18	143.519	86.2166
IL-10	29	17.9739	9.66149	D 1 (6)	(Green et al. 1999)	Plasma	DHF/DSS	17	39.8039	16.4135	12	57.7778	30.4953
IL-10	18	-16.8545	12.7347	D -2 (3)	(Chunhakan et al. 2015)	Plasma	DSS	7	44	28.8	11	27.1455	21.92
IL-10	55	73.6684	10.8898	D -1 (4)	(Chunhakan et al. 2015)	Plasma	DSS	17	41.1	22.9	38	114.768	57.7416
IL-10	101	-2.25846	7.47378	D 0 (5)	(Chunhakan et al. 2015)	Plasma	DSS	36	56.7	37.5	65	54.4415	33.0404
IL-10	97	0.634328	4.17918	D 1 (6)	(Chunhakan et al. 2015)	Plasma	DSS	30	29	14.3	67	29.6343	26.7113
IL-10	29	-1.48421	3.91132	D 2 (7)	(Chunhakan et al. 2015)	Plasma	DSS	10	14.4	10.1	19	12.9158	9.84126
IL-10	51	-3.33333	45.0641	2	(Pandey et al. 2015)	Sera	SD	30	103.333	169.647	21	100	150
IL-10	71	-47.3118	65.3538	3	(Pandey et al. 2015)	Sera	SD	31	280.645	295.199	40	233.333	241.667
IL-10	62	-102.083	67.9465	4	(Pandey et al. 2015)	Sera	SD	24	302.083	292.469	38	200	200
IL-10	27	61.6667	119.64	5	(Pandey et al. 2015)	Sera	SD	5	163.333	220.857	22	225	316.667
IL-10	15	1883.94	848.566	5	(Ferreira et al. 2015)	Plasma	DHF/DSS	7	594.713	689.945	8	2478.65	2283.96
IL-10	36	595.926	181.805	7	(Ferreira et al. 2015)	Plasma	DHF/DSS	8	154.56	229.248	28	750.486	861.128
IL-10	31	-2750.18	3034.69	8	(Ferreira et al. 2015)	Plasma	DHF/DSS	7	3410.78	8002.02	24	660.593	1218.43
IL-10	19	275.417	86.4233	9	(Ferreira et al. 2015)	Plasma	DHF/DSS	5	50.2298	21.6425	14	325.647	321.332
IL-10	26	42.7285	33.9329	10	(Ferreira et al. 2015)	Plasma	DHF/DSS	3	86.8341	39.6495	23	129.563	120.127
IL-10	23	224.079	116.603	11	(Ferreira et al. 2015)	Plasma	DHF/DSS	3	129.635	61.7746	20	353.714	496.472
IL-10	12	18.9308	49.3787	12	(Ferreira et al. 2015)	Plasma	DHF/DSS	3	75.2441	79.4544	9	94.1749	54.8202
IL-10	5	69.4844	31.7425	13	(Ferreira et al. 2015)	Plasma	DHF/DSS	1	17.4077		4	86.8921	63.4851
IL-10	2	-43.4767	0	16	(Ferreira et al. 2015)	Plasma	DHF/DSS	1	84.3191		1	40.8424
IL-10	40	-4.6	0.66	3	(Fernando et al. 2016)	Sera	SD	25	14.4	3.3	15	9.8
IL-10	40	14.7	2.38123	4	(Fernando et al. 2016)	Sera	SD	25	27.2	4.3	15	41.9	8.6
IL-10	40	16.4	1.79165	5	(Fernando et al. 2016)	Sera	SD	25	26.7	4.5	15	43.1	6
IL-10	14	4.2	2.26826	6	(Fernando et al. 2016)	Sera	SD	8	16.9	4.2	6	21.1	4.2
IL-10	14	0.7	1.18796	7	(Fernando et al. 2016)	Sera	SD	8	8.8	1.9	6	9.5	2.4
IL-10	14	-2.7	1.23811	8	(Fernando et al. 2016)	Sera	SD	8	6.4	2.9	6	3.7	1.7
IL-10	41	50	5.55355	6-11	(Libraty et al. 2002)	Plasma	DHF/DSS	12	95	17	29	145	14
IL-10	25	21.7871	9.54135	1-3	(Perez et al. 2004)	Sera	DHF/DSS	20	23.7423	37.5309	5	45.5294	10.1511
IL-10	24	50.2919	36.072	4-5	(Perez et al. 2004)	Sera	DHF/DSS	19	39.0617	55.774	5	89.3535	75.4143
IL-10	28	9.52868	11.2578	6	(Perez et al. 2004)	Sera	DHF/DSS	23	29.2948	42.4077	5	38.8235	15.5799
IL-10	99	105.3	9.20139	2-7	(R.-F. Chen et al. 2005)	Plasma	DHF/DSS	66	11.7	3.5	33	117	52.8
IL-10	32	570.705	174.862	1-18	(Chen et al. 2006)	Sera	DHF/DSS	12	15.5	5.3	20	586.205	781.977
IL-10	250	8.3	0.495215	2-7	(Chen et al. 2007)	Plasma	DHF/DSS	168	18.9	2.6	82	27.2	4.1
IL-10	259	108.2	96.1867	4-5, 10-14	(Malavige et al. 2013)	Sera	SD	219	183.4	472.8	40	291.6	573.8
IL-10	32	137.49	98.3192	1-3	(Singla et al. 2016)	Plasma	SD	23	123.79	297.54	9	261.28	228.818
IL-10	42	25.9681	80.2814	4-6	(Singla et al. 2016)	Plasma	SD	23	185.577	242.818	19	211.545	271.57
IL-10	12	173.043	118.173	7-10	(Singla et al. 2016)	Plasma	SD	3	23.4783	11.5033	9	196.522	353.96
IL-10	13	69.1	83.1074	3-5	(Zhao et al. 2016)	Plasma	SD	10	137.1	33.1	3	206.2	142.8
IL-10	27	35.6	36.3795	6-7	(Zhao et al. 2016)	Plasma	SD	18	190.5	42.1	9	226.1	105
IL-10	30	350.8	43.7922	8-10	(Zhao et al. 2016)	Plasma	SD	19	22	4.6	11	372.8	145.2
IL-10	11	6.3	2.11471	14-17	(Zhao et al. 2016)	Plasma	SD	6	4	1.2	5	10.3	4.6
IL-10					DF			1038	35.73	1.952				Random	0	98.341		31.904	39.557
IL-10	1909				SDI						871	75.802	5.207	Random	0	99.033	5.75762e-13	65.596	86.009
IL-10					Day-matched comparison DF			397	32.636	2.785				Random	0	96.666		27.178	38.094
IL-10					Day-matched comparison SDI						587	61.383	5.265	Random	0	97.992	1.3903e-06	51.064	71.701
IL-10	984	23.246	2.624	2-16	SDI vs DF									Random	0	99.751		18.103	28.39
IL-10	16	-17.3	13.3	D -2 (3)	(Chunhakan et al. 2015)	Plasma	DHF	7	44	28.8	9	26.7	23
IL-10	49	66.4	10.9	D -1 (4)	(Chunhakan et al. 2015)	Plasma	DHF	17	41.1	22.9	32	107.5	53.2
IL-10	92	-0.2	7.7	D 0 (5)	(Chunhakan et al. 2015)	Plasma	DHF	36	56.7	37.5	56	56.5	33.6
IL-10	86	-7	3.1	D 1 (6)	(Chunhakan et al. 2015)	Plasma	DHF	30	29	14.3	56	22	13.1
IL-10	20	-4.7	3.9	D 2 (7)	(Chunhakan et al. 2015)	Plasma	DHF	10	14.4	10.1	10	9.7	7.2
IL-10					DF		DHF	100	35.9	7				Random	0	91.5		22.2	49.6
IL-10					DHF		DHF				163	42.8	10.1	Random	0	97.66	0.575	23	62.5
IL-10	263	7.5	8.9		DHF vs DF		DHF							Random	0	99.82		-10	25
IL-10	9	-14.9	13.5	D -2 (3)	(Chunhakan et al. 2015)	Plasma	DSS	7	44	28.8	2	29.1	11.2
IL-10	23	112.5	27.1	D -1 (4)	(Chunhakan et al. 2015)	Plasma	DSS	17	41.1	22.9	6	153.6	65
IL-10	45	-15.1	10.5	D 0 (5)	(Chunhakan et al. 2015)	Plasma	DSS	36	56.7	37.5	9	41.6	25.4
IL-10	41	39.5	12.5	D 1 (6)	(Chunhakan et al. 2015)	Plasma	DSS	30	29	14.3	11	68.5	40.7
IL-10	19	2.1	4.8	D 2 (7)	(Chunhakan et al. 2015)	Plasma	DSS	10	14.4	10.1	9	16.5	10.7
IL-10					DF		DSS	100	35.9	7				Random	0	91.5		22.2	49.6
IL-10					DSS		DSS				37	51.8	13.1	Random	0	91.26	0.284	26.2	77.4
IL-10	137	24.4	13.3		DSS vs DF		DSS							Random	0	99.54		-1.6	50.4
IL-10					DF		SD	510	39.6	3.7				Random	0	98.92		32.4	46.8
IL-10					SD		SD				289	57	6.7	Random	0	98.38	0.023	43.8	70.1
IL-10	799	30.4	3.3		SD vs DF		SD							Random	0	99.82		24	36.7
IL-10					DF	Sera		482	22.7	3.1				Random	0	97.71		16.6	28.8
IL-10					SDI	Sera					259	46.6	6.5	Random	0	98.61	0.001	33.8	59.4
IL-10	741	13.1	3.1		SDI vs DF	Sera								Random	0	99.82		6.9	19.3
IL-10					DF	Plasma		556	45.9	2.8				Random	0	98.6		40.5	51.3
IL-10					SDI	Plasma					612	104.6	10	Random	0	98.97	0	84.9	124.3
IL-10	1168	76	5.4		SDI vs DF	Plasma								Random	0	99.86		65.5	86.5
IL-12	15	-154.005	139.284	D -3 (2)	(Green et al. 1999)	Plasma	DHF/DSS	6	750.388	301.583	9	596.382	195.373
IL-12	28	-195.587	84.659	D -2 (3)	(Green et al. 1999)	Plasma	DHF/DSS	13	727.37	236.734	15	531.783	206.984
IL-12	34	-225.312	69.2255	D -1 (4)	(Green et al. 1999)	Plasma	DHF/DSS	15	737.674	219.949	19	512.362	172.548
IL-12	35	-200.775	65.4868	D 0 (5)	(Green et al. 1999)	Plasma	DHF/DSS	20	646.047	239.295	15	445.271	146.224
IL-12	31	-158.14	63.5192	D 1 (6)	(Green et al. 1999)	Plasma	DHF/DSS	19	534.884	211.978	12	376.744	141.55
IL-12	30	2.75837	1.66883	1-5	(Braga et al. 2001)	Sera	DHF/DSS	15	1.44953	2.17386	15	4.2079	6.08682
IL-12	26	-21.2487	35.1934	1-3	(Perez et al. 2004)	Sera	DHF/DSS	21	146.138	102.075	5	124.889	60.927
IL-12	26	10.9722	47.6962	4-5	(Perez et al. 2004)	Sera	DHF/DSS	21	113.194	81.2242	5	124.167	99.0142
IL-12	26	7.66138	40.2719	6	(Perez et al. 2004)	Sera	DHF/DSS	21	108.783	112	5	116.444	71.5714
IL-12	30	-22.9339	16.0146	NA	(Arias et al. 2014)	Sera	SD	22	91.1157	44.7872	8	68.1818	36.3636
IL-12	83	-1.2	0.978779	0-2	(de la Cruz Hernández et al. 2016)	Sera	DHF/DSS	51	27.4	5.2	32	26.2	3.7
IL-12	88	1.8	1.20437	3-5	(de la Cruz Hernández et al. 2016)	Sera	DHF/DSS	50	25.6	3.9	38	27.4	6.6
IL-12					DF			274	103.057	7.956				Random	0	99.422		87.462	118.651
IL-12	281				SDI						178	110.548	8.587	Random	0	98.506	0.522225	93.718	127.377
IL-12					Day-matched comparison DF			73	651.254	26.917				Fixed	0.04	60.178		598.497	704.011
IL-12					Day-matched comparison SDI						70	472.079	19.899	Fixed	0.018	66.345	8.66542e-08	433.078	511.081
IL-12	143	-92.323	17.906	2-6	SDI vs DF									Random	0	99.226		-127.418	-57.228
IL-12	30	-22.9	16	NA	(Arias et al. 2014a)	Sera	SD	22	91.1	44.8	8	68.2	36.4				0.691
IL-12					DF	Sera		201	52.4	7.2				Random	0	99.55		38.3	66.5
IL-12					SDI	Sera					108	32.9	5.6	Random	0	97.25	0.032	21.9	43.8
IL-12	309	-1.8	1.2		SDI vs DF	Sera								Random	0	98.71		-4.2	0.6
IL-12					DF	Plasma		73	651.3	26.9				Fixed	0.04	60.18		598.5	704
IL-12					SDI	Plasma					70	472.1	19.9	Fixed	0.018	66.35	0	433.1	511.1
IL-12	143	-190.9	13.9		SDI vs DF	Plasma								Random	0	78.34		-218.2	-163.6
IL-13	3	-4.71212	4.74128	4	(Ferreira et al. 2015)	Plasma	DHF/DSS	2	4.84128	6.70518	1	0.129155
IL-13	14	-19.5581	7.05758	5	(Ferreira et al. 2015)	Plasma	DHF/DSS	9	25.6349	19.2315	5	6.07685	6.60104
IL-13	30	10.5749	14.2005	7	(Ferreira et al. 2015)	Plasma	DHF/DSS	23	23.0863	39.3375	7	33.6612	30.6697
IL-13	33	-13.5125	7.70291	8	(Ferreira et al. 2015)	Plasma	DHF/DSS	21	24.2142	30.8039	12	10.7017	13.0308
IL-13	21	15.2802	32.837	9	(Ferreira et al. 2015)	Plasma	DHF/DSS	15	22.883	28.622	6	38.1632	78.3705
IL-13	28	-6.84113	5.43614	10	(Ferreira et al. 2015)	Plasma	DHF/DSS	23	14.5576	21.3108	5	7.71648	7.0021
IL-13	20	-3.95315	12.5782	11	(Ferreira et al. 2015)	Plasma	DHF/DSS	17	25.2397	26.228	3	21.2865	18.7946
IL-13	12	29.1383	18.6748	12	(Ferreira et al. 2015)	Plasma	DHF/DSS	7	10.9622	14.6488	5	40.1006	39.8805
IL-13	2	-27.7256	0	13	(Ferreira et al. 2015)	Plasma	DHF/DSS	1	27.8256		1	0.1
IL-13	2	-1.5681	0	16	(Ferreira et al. 2015)	Plasma	DHF/DSS	1	1.6681		1	0.1
IL-13	50	145	19.526	1-18	(Mustafa et al. 2001)	Sera	DSS	24	22	12	26	167	98.7767
IL-13	99	-5.2	1.10378	2-7	(R.-F. Chen et al. 2005)	Plasma	DHF/DSS	66	11.2	4.7	33	6	5.4
IL-13					DF	Plasma		209	17.348	2.546				Random	0	75.915		12.358	22.337
IL-13	314				SDI	Plasma					105	21.549	5.008	Random	0	90.227	0.454598	11.734	31.364
IL-13					Day-matched comparison DF	Plasma		119	17.802	2.996				Random	0.053	49.572		11.93	23.673
IL-13					Day-matched comparison SDI	Plasma					46	11.641	3.082	Random	0.088	45.518	0.151749	5.601	17.682
IL-13	165	-0.643	3.693	4-16	SDI vs DF	Plasma								Random	0	95.842		-7.882	6.596
IL-13					DF	Plasma		185	11.591	0.557				Fixed	0.01	60.391		10.499	12.683
IL-13					SDI	Plasma					79	6.69	0.833	Fixed	0.06	48.262	1.0038e-06	5.056	8.323
IL-13	264	-2.368	2.315		SDI vs DF	Plasma								Random	0	95.65		-6.905	2.169
IL-17	40	44.6	13.5727	3	(Fernando et al. 2016)	Sera	SD	25	7.6	5.4	15	52.2	52.4
IL-17	40	30	3.98075	4	(Fernando et al. 2016)	Sera	SD	25	13.3	4.6	15	43.3	15
IL-17	40	19.8	2.56832	5	(Fernando et al. 2016)	Sera	SD	25	7.8	2.2	15	27.6	9.8
IL-17	14	4.1	4.88497	6	(Fernando et al. 2016)	Sera	SD	8	20.7	5.7	6	24.8	10.9
IL-17	14	7.8	4.13174	7	(Fernando et al. 2016)	Sera	SD	8	8.3	3.7	6	16.1	9.6
IL-17	14	16.7	5.17892	8	(Fernando et al. 2016)	Sera	SD	8	2.4	1.7	6	19.1	12.6
IL-17	103	52.2	4.90334	NA	(Furuta et al. 2012)	Plasma	DSS	19	36.5	18.1	84	88.7	23.9
IL-17	62	-76.5	3.23863	2-3	(Kumar et al. 2012)	Sera	DHF/DSS	44	134.7	8.2	18	58.2	12.7
IL-17	62	-16.4	2.71875	4-7	(Kumar et al. 2012)	Sera	DHF/DSS	44	60.4	7.8	18	44	10.4
IL-17	30	10.9091	12.5862	NA	(Arias et al. 2014)	Sera	SD	22	43.2086	22.3829	8	54.1176	32.9412
IL-17	211	1.65	0.666057	NA	(Jain et al. 2013)	Sera	SD	90	3.36	3.5	121	5.01	6.1
IL-17					DF			318	30.707	8.758				Random	0	99.92		13.541	47.873
IL-17	630				SDI						312	39.101	10.06	Random	0	99.36	0.529138	19.383	58.819
IL-17					Day-matched comparison DF			99	9.752	1.899				Random	0	96.777		6.03	13.474
IL-17					Day-matched comparison SDI						63	28.256	4.5	Random	0	84.113	0.000151572	19.437	37.075
IL-17	162	20.397	4.096		SDI vs DF									Random	0	99.233		12.369	28.425
IL-17	62	40.7	5.2	NA	(Furuta et al. 2012)	Plasma	DHF	19	36.5	18.1	43	77.2	20.7				0.139
IL-17	60	64.2	5.3	NA	(Furuta et al. 2012)	Plasma	DSS	19	36.5	18.1	41	100.7	20.7				0.02
IL-17					DF		SD	211	11.1	1.7				Random	0	97.53		7.8	14.5
IL-17					SD		SD				192	28.2	6.5	Random	0	96.83	0.011	15.5	40.9
IL-17	403	16.9	5.1		SD vs DF		SD							Random	0	99.84		6.9	27
IL-17					DF	Sera		299	30.1	9.2				Random	0	99.93		12.1	48.1
IL-17					SDI	Sera					228	33.7	7.8	Random	0	98.71	0.769	18.4	49
IL-17	527	4.2	9.5		SDI vs DF	Sera								Random	0	99.98		-14.3	22.8
IL-18	50	257	29.056	1-18	(Mustafa et al. 2001)	Sera	DSS	24	76	50	26	333	138.716
IL-18	50	197	73.4666	1-10	(Elzinandes L Azeredo et al. 2006)	Plasma	DHF/DSS	31	210	189	19	407	284
IL-18	77	83.8385	71.4275	NA	(Michels et al. 2015)	Plasma	SD	65	187.524	121.114	12	271.363	241.898
IL-18					DF			120	154.908	46.212				Random	0	95.621		64.333	245.482
IL-18					SDI						57	335.678	23.622	Fixed	0.358	2.69	0.000495672	289.38	381.976
IL-18	177	179.374	56.798		SDI vs DF									Random	0	99.453		68.052	290.695
IL-18					DF	Plasma		96	191.184	13.736				Fixed	0.544	0		164.262	218.106
IL-18					SDI	Plasma					31	343.892	47.638	Fixed	0.156	50.393	0.000495672	250.523	437.262
IL-18	127	140.215	56.6		SDI vs DF	Plasma								Random	0	98.64		29.282	251.149
IL-18BP	76	-2.29057	2.67678	NA	(Michels et al. 2015)	Plasma	SD	64	18.2215	8.23111	12	15.931	8.56028
IL-18FP	74	37.2147	23.9494	NA	(Michels et al. 2015)	Plasma	SD	62	65.6637	42.978	12	102.878	80.7798
IL-21	152	-2.94129	28.8415	1-7	(Vivanco-Cid et al. 2014)	Sera	DHF/DSS	103	145.836	229.337	49	142.894	125.454
IL-21	89	-46.5078	35.0158	8-10	(Vivanco-Cid et al. 2014)	Sera	DHF/DSS	41	152.15	201.141	48	105.642	107.181
IL-21					DF	Sera		144	147.983	18.341				Fixed	0.869	0		112.035	183.93
IL-21					SDI	Sera					97	121.523	11.714	Fixed	0.115	59.689	0.224043	98.564	144.481
IL-21	241	-24.605	21.8	1-10	SDI vs DF	Sera								Random	0	98.989		-67.332	18.122
IL-33	40	-18.6	99.1379	3-6	(Guerrero et al. 2013)	Plasma	SD	26	135.5	419.2	14	116.9	207.3
TNF-a	6	50.4609	18.7872	2	(Kittigul et al. 2000)	Sera	DHF/DSS	1	23		5	73.4609	42.0096
TNF-a	7	10.3986	10.4057	3	(Kittigul et al. 2000)	Sera	DHF/DSS	1	36		6	46.3986	25.4886
TNF-a	22	12.2283	10.8348	4	(Kittigul et al. 2000)	Sera	DHF/DSS	4	49.25	18.4639	18	61.4783	24.0614
TNF-a	13	17.4348	21.3672	5	(Kittigul et al. 2000)	Sera	DHF/DSS	3	52	24.5764	10	69.4348	50.5198
TNF-a				6	(Kittigul et al. 2000)	Sera	DHF/DSS	1	42
TNF-a	18	0.454545	0.910064	D -2 (3)	(Chunhakan et al. 2015)	Plasma	DSS	7	4	2	11	4.45455	1.68067
TNF-a	55	0.510526	0.56374	D -1 (4)	(Chunhakan et al. 2015)	Plasma	DSS	17	4.1	2	38	4.61053	1.77068
TNF-a	101	-0.861538	0.370016	D 0 (5)	(Chunhakan et al. 2015)	Plasma	DSS	36	4.3	1.9	65	3.43846	1.54311
TNF-a	97	-0.283582	0.341942	D 1 (6)	(Chunhakan et al. 2015)	Plasma	DSS	30	3.8	1.5	67	3.51642	1.67599
TNF-a	29	-0.436842	0.472466	D 2 (7)	(Chunhakan et al. 2015)	Plasma	DSS	10	3.5	1.2	19	3.06316	1.22689
TNF-a	3	3.07942	6.3816	4	(Ferreira et al. 2015)	Plasma	DHF/DSS	1	11.1588		2	14.2383	9.02494
TNF-a	13	17.9913	9.25636	5	(Ferreira et al. 2015)	Plasma	DHF/DSS	6	17.394	7.17074	7	35.3853	23.233
TNF-a	26	4.14823	6.43915	7	(Ferreira et al. 2015)	Plasma	DHF/DSS	7	17.7183	13.928	19	21.8665	16.1632
TNF-a	35	40.4088	32.3939	8	(Ferreira et al. 2015)	Plasma	DHF/DSS	13	22.8147	15.5747	22	63.2236	150.584
TNF-a	19	-10.0532	9.79115	9	(Ferreira et al. 2015)	Plasma	DHF/DSS	6	28.2435	22.4732	13	18.1904	12.3291
TNF-a	20	2.6335	3.93823	10	(Ferreira et al. 2015)	Plasma	DHF/DSS	3	15.4429	3.60063	17	18.0764	13.7912
TNF-a	22	4.10865	6.43845	11	(Ferreira et al. 2015)	Plasma	DHF/DSS	3	20.0303	5.6847	19	24.1389	24.1444
TNF-a	15	-21.7794	14.2944	12	(Ferreira et al. 2015)	Plasma	DHF/DSS	5	39.7411	30.1213	10	17.9617	15.1228
TNF-a	5	6.49763	2.83596	13	(Ferreira et al. 2015)	Plasma	DHF/DSS	1	4.64159		4	11.1392	5.67193
TNF-a	2	1.7968	0	16	(Ferreira et al. 2015)	Plasma	DHF/DSS	1	15.5052		1	17.302
TNF-a	36	8.7	1.09272	4	(Kamaladasa et al. 2016)	Sera	DHF/DSS	11	1.8	1.3	25	10.5	5.1
TNF-a	36	27.9	2.63887	4.5	(Kamaladasa et al. 2016)	Sera	DHF/DSS	11	6.8	5.3	25	34.7	10.5
TNF-a	36	13.4	2.64107	5	(Kamaladasa et al. 2016)	Sera	DHF/DSS	11	1.8	2.4	25	15.2	12.7
TNF-a	36	36.7	2.02	5.5	(Kamaladasa et al. 2016)	Sera	DHF/DSS	11	0.9		25	37.6	10.1
TNF-a	36	38.9	3.77354	6	(Kamaladasa et al. 2016)	Sera	DHF/DSS	11	5.1	3.3	25	44	18.2
TNF-a	36	22.2	2.28433	6.5	(Kamaladasa et al. 2016)	Sera	DHF/DSS	11	4.6	4	25	26.8	9.7
TNF-a	36	34.5	7.5861	7	(Kamaladasa et al. 2016)	Sera	DHF/DSS	11	16.7	16.9	25	51.2	28.1
TNF-a	83	-0.7	0.526992	0-2	(de la Cruz Hernández et al. 2016)	Sera	DHF/DSS	51	3.9	3	32	3.2	1.8
TNF-a	88	0.8	0.520688	3-5	(de la Cruz Hernández et al. 2016)	Sera	DHF/DSS	50	2.8	1.8	38	3.6	2.8
TNF-a	24	293521	109760	NA	(Yadav et al. 1991)	Sera	DSS	8	13031.9	9607.71	16	306553	438828
TNF-a	24	106.879	51.9869	1-5	(Braga et al. 2001)	Sera	DHF/DSS	16	23.1701	15.5885	8	130.049	146.627
TNF-a	32	4.075	1.06989	NA	(Chen et al., 2006)	Sera	DHF/DSS	12	2.3	0.9	20	6.375	4.64146
TNF-a	69	33.08	3.89438	NA	(Wang et al. 2007)	Plasma	DHF/DSS	44	3.49	0.36	25	36.57	19.47
TNF-a	24	1.21	2.67034	1-5	(Restrepo et al. 2008)	Sera	DHF/DSS	17	5.48	4.89	7	6.69	6.33
TNF-a	70	6.66667	1.98524	NA	(Levy et al. 2010)	Sera	DHF	36	86.6667	6	34	93.3333	10
TNF-a	104	-0.90296	2.68599	2-5	(Priyadarshini et al. 2010)	Plasma	DHF/DSS	72	4.09188	21.2451	32	3.18892	5.50123
TNF-a	103	-2.07785	1.89665	6-15	(Priyadarshini et al. 2010)	Plasma	DHF/DSS	78	4.43239	16.0008	25	2.35455	2.80575
TNF-a	30	8.58586	8.38274	NA	(Arias et al. 2014)	Sera	SD	22	43.6364	21.1175	8	52.2222	20
TNF-a	39	-0.7	2.22619	3-6	(Guerrero et al. 2013)	Plasma	SD	27	5.7	9.5	12	5	4.4
TNF-a	61	-36.2719	22.4656	1-11	(Limonta et al. 2014)	Plasma	SD	45	69.8246	108.175	16	33.5526	62.5667
TNF-a	81	97.3444	21.0525	NA	(Soundravally et al. 2014)	Plasma	DSS	27	102.2	37.4	54	199.544	145.381
TNF-a	77	-3.1	10.8503	1-5	(Oliveira et al. 2016)	Sera/plasma	DHF/DSS	44	52.2	49.8	33	49.1	45
TNF-a	67	44.41	29.5981	3-5	(Senaratne, Carr, and Noordeen 2016)	Plasma	DHF/DSS	24	51.78	17.37	43	96.19	192.69
TNF-a	30	-9.77604	7.22349	1-3	(Singla et al. 2016)	Plasma	SD	20	23.1823	29.8874	10	13.4062	8.66958
TNF-a	50	10.6384	9.62966	4-6	(Singla et al. 2016)	Plasma	SD	23	20.4303	12.0076	27	31.0687	48.3162
TNF-a	12	9.1088	14.9846	7-10	(Singla et al. 2016)	Plasma	SD	3	16.875	6.03538	9	25.9838	43.7215
TNF-a	13	13.9506	2.85352	3-5	(Zhao et al. 2016)	Plasma	SD	10	27.1605	2.83951	3	41.1111	4.69136
TNF-a	27	12.8395	1.06082	6-7	(Zhao et al. 2016)	Plasma	SD	18	25.8025	2.34568	9	38.642	2.71605
TNF-a	30	9.25926	1.6279	8-10	(Zhao et al. 2016)	Plasma	SD	19	26.5432	2.46914	11	35.8025	5.06173
TNF-a	11	8.02469	4.34011	14-17	(Zhao et al. 2016)	Plasma	SD	6	16.6667	2.71605	5	24.6914	9.38272
TNF-a					DF			905	18.5	1.4				Random	0	99.64		15.7	21.2
TNF-a	1819				SDI						1005	24.3	1.4	Random	0	99.25	0.003	21.5	27
TNF-a					Day-matched comparison DF			233	6.578	0.662				Random	0	90.607		5.28	7.875
TNF-a					Day-matched comparison SDI						528	18.889	1.119	Random	0	97.94	0	16.695	21.082
TNF-a	760	11.549	1.024	3-16	SDI vs DF									Random	0	99.915		9.542	13.556
TNF-a	22	-12837.3	3397.99	NA	(Yadav et al. 1991)	Sera	DHF	8	13031.9	9607.71	14	194.662	330.575
TNF-a	83	13.2365	6.99141	1-10	(Kittigul et al. 2000)	Sera	DHF	37	14.1	24	46	27.3365	39.1454
TNF-a	70	6.66667	1.98524	NA	(Levy et al. 2010)	Sera	DHF	36	86.6667	6	34	93.3333	10
TNF-a	57	46.5	20.922	NA	Soundravally et al. 2014	Plasma	DHF	27	102.2	37.4	30	148.7	107.6
TNF-a	16	0.533333	0.937745	D -2 (3)	(Chunhakan et al. 2015)	Plasma	DHF	7	4	2	9	4.53333	1.66476
TNF-a	49	0.60625	0.561352	D -1 (4)	(Chunhakan et al. 2015)	Plasma	DHF	17	4.1	2	32	4.70625	1.59822
TNF-a	92	-0.758929	0.372986	D 0 (5)	(Chunhakan et al. 2015)	Plasma	DHF	36	4.3	1.9	56	3.54107	1.47482
TNF-a	86	-0.535714	0.323919	D 1 (6)	(Chunhakan et al. 2015)	Plasma	DHF	30	3.8	1.5	56	3.26429	1.29449
TNF-a	20	-0.74	0.501797	D 2 (7)	(Chunhakan et al. 2015)	Plasma	DHF	10	3.5	1.2	10	2.76	1.03827
TNF-a					DF		DHF	208	26.288	5.617				Random	0	99.884		15.278	37.298
TNF-a					DHF		DHF				287	21.08	2.655	Random	0	99.717	0.401884	15.876	26.284
TNF-a	495	3.609	0.526		DHF vs DF		DHF							Random	0	99.611		2.579	4.639
TNF-a	10	-11942.1	3401.67	NA	(Yadav et al. 1991)	Sera	DSS	8	13031.9	9607.71	2	1089.79	256.357
TNF-a	53	23.34	11.2168	1-10	(Kittigul et al. 2000)	Sera	DSS	37	14.1	24	16	37.44	42
TNF-a	51	160.9	33.4436	NA	Soundravally et al. 2014	Plasma	DSS	27	102.2	37.4	24	263.1	160
TNF-a	9	0.1	1.42001	D -2 (3)	(Chunhakan et al. 2015)	Plasma	DSS	7	4	2	2	4.1	1.7
TNF-a	23	0	1.13003	D -1 (4)	(Chunhakan et al. 2015)	Plasma	DSS	17	4.1	2	6	4.1	2.5
TNF-a	45	-1.5	0.678438	D 0 (5)	(Chunhakan et al. 2015)	Plasma	DSS	36	4.3	1.9	9	2.8	1.8
TNF-a	41	1	0.830389	D 1 (6)	(Chunhakan et al. 2015)	Plasma	DSS	30	3.8	1.5	11	4.8	2.6
TNF-a	19	-0.1	0.576002	D 2 (7)	(Chunhakan et al. 2015)	Plasma	DSS	10	3.5	1.2	9	3.4	1.3
TNF-a					DF		DSS	172	6.933	1.196				Random	0	96.676		4.589	9.277
TNF-a					DSS		DSS				79	5.349	1.671	Random	0	93.867	0.440804	2.073	8.624
TNF-a	251	11.707	1.328		DSS vs DF		DSS							Random	0	99.609		9.104	14.31
TNF-a					DF			193	22.957	2.042				Random	0	95.836		18.955	26.96
TNF-a					SD						110	29.838	5.861	Random	0	98.376	0.267573	18.35	41.326
TNF-a	303	2.9	2.327		SD vs DF									Random	0	99.428		-1.661	7.461
TNF-a					DF	Sera		299	18.475	3.71				Random	0	99.789		11.203	25.747
TNF-a					SDI	Sera					377	35.415	4.513	Random	0	99.502	0.00373646	26.569	44.261
TNF-a	675	18.125	1.849		SDI vs DF	Sera								Random	0	99.933		14.501	21.749
TNF-a					DF	Plasma		562	17.9	1.6				Random	0	99.46		14.7	21
TNF-a					SDI	Plasma					595	17.3	1.4	Random	0	98.9	0.8	14.6	20
TNF-a	1157	7.1	0.7		SDI vs DF	Plasma								Random	0	99.79		5.8	8.4
sTNF-R1	29	165.079	82.6308	3	(Green et al. 1999)	Plasma	DHF/DSS	15	155.556	128.208	14	320.635	283.282
sTNF-R1	38	105.802	56.1199	4	(Green et al. 1999)	Plasma	DHF/DSS	18	197.531	147.34	20	303.333	197.149
sTNF-R1	37	68.8326	57.6186	5	(Green et al. 1999)	Plasma	DHF/DSS	19	187.135	203.892	18	255.967	142.738
sTNF-R1	28	59.7911	43.384	6	(Green et al. 1999)	Plasma	DHF/DSS	15	84.9383	116.715	13	144.729	112.527
sTNF-R1	26	49.03	51.6817	13-18	(Green et al. 1999)	Plasma	DHF/DSS	12	45.679	67.0645	14	94.709	179.295
sTNF-R1	69	2780	256.003	NA	(Wang et al. 2007)	Plasma	DHF/DSS	44	2846	212	25	5626	1270
sTNF-R1	30	1090.91	719.418	NA	(Arias et al. 2014)	Sera	SD	22	2909.09	1515.08	8	4000	1818.18
sTNF-R1					DF			145	895.107	415.303				Random	0	99.906		81.128	1709.09
sTNF-R1	257				SDI						112	1126.19	189.593	Random	0	98.814	0.61273	754.599	1497.79
sTNF-R1					Day-matched comparison DF			67	146.901	17.406				Fixed	0.067	58.133		112.786	181.016
sTNF-R1					Day-matched comparison SDI						65	246.005	42.523	Random	0.007	75.454	0.0310138	162.663	329.348
sTNF-R1	132	98.228	19.337	3-6	SDI vs DF									Random	0	93.308		60.329	136.127
sTNF-R1	30	1090.9	719.4	NA	(Arias et al. 2014)	Sera	SD	22	2909.1	1515.1	8	4000	1818.2				0.645
sTNF-R1					DF	Plasma		123	586.2	444.6				Random	0	99.92		-285.2	1457.5
sTNF-R1					SDI	Plasma					104	943.2	189	Random	0	98.94	0.46	572.7	1313.6
sTNF-R1	227	536.4	174.1		SDI vs DF	Plasma								Random	0	99.93		195.1	877.6
sTNF-R2	30	921.212	287.923	3	(Green et al. 1999)	Plasma	DHF/DSS	15	1323.23	348.845	15	2244.44	1059.15
sTNF-R2	36	812.459	305.788	4	(Green et al. 1999)	Plasma	DHF/DSS	17	1857.4	583.359	19	2669.86	1181.64
sTNF-R2	38	928.125	295.356	5	(Green et al. 1999)	Plasma	DHF/DSS	20	2150	568.643	18	3078.12	1131.02
sTNF-R2	30	601.402	317.887	6	(Green et al. 1999)	Plasma	DHF/DSS	16	1876.95	479.321	14	2478.35	1101.68
sTNF-R2	25	321.023	233.182	13-18	(Green et al. 1999)	Plasma	DHF/DSS	11	906.25	354.105	14	1227.27	775.658
sTNF-R2	30	314.286	295.361	1-5	(Braga et al. 2001)	Sera	DHF/DSS	15	3063.1	695.803	15	3377.38	907.981
sTNF-R2	41	5263	204.44	6-11	(Libraty et al. 2002)	Plasma	DHF/DSS	12	7357	513	29	12620	759
sTNF-R2	69	4557	456.137	NA	(Wang et al. 2007)	Plasma	DHF/DSS	44	8289	778	25	12846	2204
sTNF-R2	30	10721	2632.39	NA	(Arias et al. 2014)	Sera	SD	22	6520.38	4653.14	8	17241.4	6896.55
sTNF-R2					DF			172	3671.24	963.943				Random	0	99.792		1781.95	5560.54
sTNF-R2	329				SDI						157	6220.15	1856.41	Random	0	99.785	0.223016	2581.65	9858.66
sTNF-R2					Day-matched comparison DF			68	1795.33	196.25				Random	0	91.03		1410.68	2179.97
sTNF-R2					Day-matched comparison SDI						66	2628.92	137.898	Fixed	0.165	41.183	0.000510016	2358.65	2899.2
sTNF-R2	134	817.958	71.995	3-6	SDI vs DF									Random	0	86.86		676.851	959.066
sTNF-R2	30	10721	2632.4	NA	(Arias et al. 2014)	Sera	SD	22	6520.4	4653.1	8	17241.4	6896.6				0.198
sTNF-R2					DF	Sera		37	4654.1	1723.2				Random	0	91.5		1276.8	8031.4
sTNF-R2					SDI	Sera					23	10097	6928.7	Random	0	96.88	0.446	-3483.1	23677.1
sTNF-R2	60	5506.7	5203.3		SDI vs DF	Sera								Random	0	99.78		-4691.7	15705
sTNF-R2					DF	Plasma		135	3393.7	1128.3				Random	0	99.84		1182.3	5605
sTNF-R2					SDI	Plasma					134	5306.7	2219.9	Random	0	99.83	0.442	955.8	9657.5
sTNF-R2	269	1915	899.8		SDI vs DF	Plasma								Random	0	99.96		151.4	3678.6
MIF	2	-10109.5	0	4	(Ferreira et al. 2015)	Plasma	DHF/DSS	1	16259.6		1	6150.2
MIF	17	4955.75	4956.44	5	(Ferreira et al. 2015)	Plasma	DHF/DSS	9	7637.84	5900.12	8	12593.6	12868.1
MIF	27	2408.07	5775.69	7	(Ferreira et al. 2015)	Plasma	DHF/DSS	21	9602.02	6074.02	6	12010.1	13769.9
MIF	30	-2528.48	2277.55	8	(Ferreira et al. 2015)	Plasma	DHF/DSS	18	10754.1	8645.22	12	8225.59	3524.21
MIF	21	-4170.99	2588.82	9	(Ferreira et al. 2015)	Plasma	DHF/DSS	16	11520.2	9157.68	5	7349.19	2702.34
MIF	25	-943.533	2793.37	10	(Ferreira et al. 2015)	Plasma	DHF/DSS	19	9181.5	8166.58	6	8237.97	5075.09
MIF	15	9933.4	10434.7	11	(Ferreira et al. 2015)	Plasma	DHF/DSS	12	9083.13	6225.62	3	19016.5	17803.3
MIF	11	2872.53	7461.39	12	(Ferreira et al. 2015)	Plasma	DHF/DSS	6	12637.5	10408.1	5	15510	13714.5
MIF	32	27.365	4.866	1-18	(Chen et al. 2006)	Sera	DHF/DSS	12	3.3	0.6	20	30.665	21.7476
MIF	64	29224	12571.4	4-5, 10-14	(Malavige et al. 2013)	Sera	SD	7	39783	26139	57	69007	58692
MIF	13	82.9	42.0888	3-5	(Zhao et al. 2016)	Plasma	SD	10	75.6		3	158.5	72.9
MIF	27	27	10.9	6-7	(Zhao et al. 2016)	Plasma	SD	18	89.9		9	116.9	32.7
MIF	30	54.7	9.07549	8-10	(Zhao et al. 2016)	Plasma	SD	19	105.1		11	159.8	30.1
MIF	11	71.4	29.4714	14-17	(Zhao et al. 2016)	Plasma	SD	6	88.4		5	159.8	65.9
MIF					DF			174	9963.77	2524.93				Random	0	95.902		5014.99	14912.5
MIF	325				SDI						151	166.595	49.855	Random	0	97.089	0.000104708	68.882	264.309
MIF					Day-matched comparison DF			102	9614.2	723.716				Fixed	0.85	0		8195.74	11032.7
MIF					Day-matched comparison SDI						46	8240.29	707.134	Fixed	0.621	0	0.174514	6854.33	9626.25
MIF	148	1053.45	1214.63	4-12	SDI vs DF									Random	0	93.48		-1327.19	3434.09
MIF					DF		SD	60	39783	26139
MIF					SD		SD				85	150.1	43.1	Random	0	95.46	0.129	65.6	234.6
MIF	145	63	19.8		SD vs DF		SD							Random	0	99.15		24.2	101.8
MIF					DF	Sera		19	18666.3	19852				Random	0	93.83		-20242.8	57575.5
MIF					SDI	Sera					77	34080.8	34485.4	Random	0	98.73	0.698	-33509.3	101671
MIF	96	14583.4	14598.2		SDI vs DF	Sera								Random	0	99.71		-14028.6	43195.4
MIF					DF	Plasma		155	9614.2	723.7				Fixed	0.85	0		8195.7	11032.7
MIF					SDI	Plasma					74	8240.3	707.1	Random	0	93.11	0.175	89.3	299.5
MIF	229	52.7	14.7		SDI vs DF	Plasma								Random	0	96.16		23.9	81.4
TGF-b	51	-24.8485	9.41742	2	(Pandey et al. 2015)	Sera	SD	30	52.1212	39.9757	21	27.2727	27.2727
TGF-b	71	-29.9609	10.1009	3	(Pandey et al. 2015)	Sera	SD	31	66.3245	44.2736	40	36.3636	39.3939
TGF-b	62	-8.14394	12.4719	4	(Pandey et al. 2015)	Sera	SD	24	71.7803	41.8118	38	63.6364	56.0606
TGF-b	27	30.9091	33.8106	5	(Pandey et al. 2015)	Sera	SD	5	84.2424	75.1043	22	115.152	18.1818
TGF-b	9	225	112.599	1-4	(Agarwal et al. 1999)	Sera	DHF/DSS	7	225	100	2	450	150
TGF-b	17	790	133.673	5-9	(Agarwal et al. 1999)	Sera	DHF/DSS	10	650	180	7	1440	320
TGF-b	22	960	55.6883	9-18	(Agarwal et al. 1999)	Sera	DHF/DSS	1	90	30	21	1050	215
TGF-b	50	9.534	3.28902	1-10	(Elzinandes L Azeredo et al. 2006)	Plasma	DHF/DSS	31	11.186	3.134	19	20.72	14.125
TGF-b					DF	Sera		139	119.188	20.875				Random	0	97.64		78.273	160.102
TGF-b	309				SDI	Sera					170	253.039	30.736	Random	0	99.285	0.000315125	192.798	313.281
TGF-b					Day-matched comparison DF	Sera		90	62.744	4.51				Fixed	0.277	22.252		53.905	71.583
TGF-b					Day-matched comparison SDI	Sera					121	60.735	24.67	Random	0	98.579	0.936152	12.382	109.088
TGF-b	211	-9.974	6.697	2-5	SDI vs DF	Sera								Random	0	98.436		-23.099	3.151
TGF-b					DF		SD	90	62.7	4.5				Fixed	0.277	22.25		53.9	71.6
TGF-b					SD		SD				121	60.7	24.7	Random	0	98.58	0.936	12.4	109.1
TGF-b	211	-10	6.7		SD vs DF		SD							Random	0	98.44		-23.1	3.2
sST2	9	2.16333	2.4743	D -3 (2)	(Butthep et al. 2006)	Plasma	DSS	3	5.97	2.9	6	8.13333	4.4624
sST2	24	1.045	1.34043	D -2 (3)	(Butthep et al. 2006)	Plasma	DSS	6	5.78	2.6	18	6.825	3.47295
sST2	60	0.306667	0.971555	D -1 (4)	(Butthep et al. 2006)	Plasma	DSS	18	6.29	3.4	42	6.59667	3.55968
sST2	84	0.839516	0.974375	D 0 (5)	(Butthep et al. 2006)	Plasma	DSS	22	6.58	3.2	62	7.41952	5.47769
sST2	80	1.53281	0.913446	D 1 (6)	(Butthep et al. 2006)	Plasma	DSS	16	5.46	3.1	64	6.99281	3.86789
sST2	39	3.26606	1.17689	D 2 (7)	(Butthep et al. 2006)	Plasma	DSS	6	5.19	2.2	33	8.45606	4.36894
sST2	38	4186.05	512.866	2-3	(Houghton-Trivino et al. 2009)	Sera	DHF/DSS	21	2009.3	334.884	17	6195.35	2093.02
sST2	38	2679.07	532.972	4	(Houghton-Trivino et al. 2009)	Sera	DHF/DSS	21	1423.26	334.884	17	4102.33	2176.74
sST2	38	2595.35	197.427	5-7	(Houghton-Trivino et al. 2009)	Sera	DHF/DSS	21	837.209	627.907	17	3432.56	586.047
sST2	67	7774.5	3749.11	3-6	(Guerrero et al. 2013)	Plasma	SD	39	1641.1	2369	28	9415.6	19736.6
sST2	30	184.711	14.9302	NA	(Arias et al. 2014)	Sera	SD	22	51.6529	17.3709	8	236.364	40.9091
sST2					DF			195	31.986	5.449				Random	0	99.251		21.305	42.666
sST2	507				SDI						312	22.88	4.057	Random	0	99.049	0.180112	14.929	30.83
sST2					Day-matched comparison DF			71	5.969	0.357				Fixed	0.828	0		5.269	6.668
sST2					Day-matched comparison SDI						225	7.163	0.278	Fixed	0.447	0	0.00831942	6.619	7.707
sST2	296	1.461	0.406	2-7	SDI vs DF									Random	0	97.401		0.666	2.256
sST2	8	1.6	2.5	D -3 (2)	(Butthep et al. 2006)	Plasma	DHF	3	6	2.9	5	7.6	4.1
sST2	21	0.3	1.3	D -2 (3)	(Butthep et al. 2006)	Plasma	DHF	6	5.8	2.6	15	6.1	3.1
sST2	56	-0.2	1	D -1 (4)	(Butthep et al. 2006)	Plasma	DHF	18	6.3	3.4	38	6.1	3.3
sST2	75	-0.6	0.8	D 0 (5)	(Butthep et al. 2006)	Plasma	DHF	22	6.6	3.2	53	5.9	2.9
sST2	67	0.6	0.9	D 1 (6)	(Butthep et al. 2006)	Plasma	DHF	16	5.5	3.1	51	6	3.5
sST2	28	1.4	1.1	D 2 (7)	(Butthep et al. 2006)	Plasma	DHF	6	5.2	2.2	22	6.6	3.1
sST2					DF		DHF	71	6	0.4				Fixed	0.828	0		5.3	6.7
sST2					DHF		DHF				184	6.1	0.2	Fixed	0.909	0	0.768	5.6	6.6
sST2	255	0.4	0.3		DHF vs DF		DHF							Random	0	95.96		-0.3	1
sST2	4	4.9	1.7	D -3 (2)	(Butthep et al. 2006)	Plasma	DSS	3	6	2.9	1	10.9	0
sST2	9	4.8	1.5	D -2 (3)	(Butthep et al. 2006)	Plasma	DSS	6	5.8	2.6	3	10.6	1.8
sST2	22	5	1.1	D -1 (4)	(Butthep et al. 2006)	Plasma	DSS	18	6.3	3.4	4	11.3	1.4
sST2	31	9.6	2.8	D 0 (5)	(Butthep et al. 2006)	Plasma	DSS	22	6.6	3.2	9	16.2	8.1
sST2	29	5.3	1.1	D 1 (6)	(Butthep et al. 2006)	Plasma	DSS	16	5.5	3.1	13	10.7	2.8
sST2	17	7	1.5	D 2 (7)	(Butthep et al. 2006)	Plasma	DSS	6	5.2	2.2	11	12.2	3.8
sST2					DF		DSS	71	6	0.4				Fixed	0.828	0		5.3	6.7
sST2					DSS		DSS				41	11.2	0.4	Fixed	0.293	19.14	0	10.4	12.1
sST2	112	6.1	0.6		DSS vs DF		DSS							Random	0	94.43		4.9	7.3
sST2							SD	61	801.135	793.41				Random	0	94.303		-753.92	2356.19
sST2							SD				36	4068.22	4526.61	Random	0.014	83.489	0.477138	-4803.77	12940.2
sST2	97	3965.78	3794.88				SD							Random	0	99.636		-3472.04	11403.6
sST2					DF	Sera		85	1079.9	568.1				Random	0	99.73		-33.5	2193.4
sST2					SDI	Sera					59	3456.8	1247.2	Random	0	99.57	0.083	1012.3	5901.4
sST2	144	2410.2	937.1		SDI vs DF	Sera								Random	0	99.97		573.5	4247
sST2					DF	Plasma		110	6	0.4				Fixed	0.002	71.06		5.3	6.7
sST2					SDI	Plasma					253	7.2	0.3	Fixed	0.085	46.03	0.008	6.6	7.7
sST2	363	1.5	0.6		SDI vs DF	Plasma								Random	0	98.75		0.3	2.7
sE-selectin	27	11.8912	12.3841	5	(Khongphatthanayothin, Phumaphuti, Thongchaiprasit, & Poovorawan, 2006)	Sera	DHF/DSS	11	63.8528	25.8104	16	75.744	38.5339
L-Selectin	12	-315	133.268	1	(Murgue, Cassar, and Deparis 2001)	Plasma	DHF/DSS	11	1543	442	1	1228
L-Selectin	26	-582	1052.06	2	(Murgue, Cassar, and Deparis 2001)	Plasma	DHF/DSS	24	1613	5151	2	1031	51
L-Selectin	37	-155	293.357	3	(Murgue, Cassar, and Deparis 2001)	Plasma	DHF/DSS	34	1528	510	3	1373	485
L-Selectin	45	-118	172.433	4	(Murgue, Cassar, and Deparis 2001)	Plasma	DHF/DSS	35	1509	484	10	1391	480
L-Selectin	43	-173	121.623	5	(Murgue, Cassar, and Deparis 2001)	Plasma	DHF/DSS	33	1535	416	10	1362	309
L-Selectin	31	-93	97.0325	6	(Murgue, Cassar, and Deparis 2001)	Plasma	DHF/DSS	23	1458	324	8	1365	197
L-Selectin	18	-79	134.395	7	(Murgue, Cassar, and Deparis 2001)	Plasma	DHF/DSS	14	1443	485	4	1364	71
L-Selectin	15	-27	157.899	8	(Murgue, Cassar, and Deparis 2001)	Plasma	DHF/DSS	10	1459	211	5	1432	320
L-Selectin					DF	Plasma		184	1492.63	31.14				Fixed	0.987	0		1431.6	1553.66
L-Selectin					SDI	Plasma					43	1313.66	83.221	Random	0	88.799	0.0440007	1150.56	1476.78
L-Selectin	227	-143.822	28.897	1-8	SDI vs DF	Plasma								Random	0	85.178		-200.46	-87.184
P-Selectin	12	-47	13.2665	1	(Murgue, Cassar, and Deparis 2001)	Plasma	DHF/DSS	11	76	44	1	29
P-Selectin	26	-19	10.1016	2	(Murgue, Cassar, and Deparis 2001)	Plasma	DHF/DSS	24	57	41	2	38	8
P-Selectin	37	-11	11.5953	3	(Murgue, Cassar, and Deparis 2001)	Plasma	DHF/DSS	34	50	36	3	39	17
P-Selectin	45	-21	6.39754	4	(Murgue, Cassar, and Deparis 2001)	Plasma	DHF/DSS	35	47	29	10	26	13
P-Selectin	43	-17	5.49463	5	(Murgue, Cassar, and Deparis 2001)	Plasma	DHF/DSS	33	39	27	10	22	9
P-Selectin	31	-14	8.52331	6	(Murgue, Cassar, and Deparis 2001)	Plasma	DHF/DSS	23	41	32	8	27	15
P-Selectin	18	-12	13.0027	7	(Murgue, Cassar, and Deparis 2001)	Plasma	DHF/DSS	14	49	41	4	37	14
P-Selectin	15	17	15.0067	8	(Murgue, Cassar, and Deparis 2001)	Plasma	DHF/DSS	10	49	30	5	66	26
P-Selectin					DF	Plasma		184	46.59	2.391				Fixed	0.178	31.347		41.904	51.275
P-Selectin					SDI	Plasma					43	27.989	1.865	Fixed	0.002	72.003	8.55888e-10	24.334	31.643
P-Selectin	227	-15.604	2.871	1-8	SDI vs DF	Plasma								Random	0	95.948		-21.232	-9.977
VEGF	45	-118.125	10.8149	D -3 (2)	(Srikiatkhachorn et al. 2006)	Plasma	DHF/DSS	22	717.5	43.75	23	599.375	26.25
VEGF	45	-131.25	10.0216	D -2 (3)	(Srikiatkhachorn et al. 2006)	Plasma	DHF/DSS	22	704.375	39.375	23	573.125	26.25
VEGF	45	-78.75	10.0216	D -1 (4)	(Srikiatkhachorn et al. 2006)	Plasma	DHF/DSS	22	695.625	39.375	23	616.875	26.25
VEGF	45	-70	14.1593	D 0 (5)	(Srikiatkhachorn et al. 2006)	Plasma	DHF/DSS	22	721.875	61.25	23	651.875	26.25
VEGF	45	-65.625	12.9553	D 1 (6)	(Srikiatkhachorn et al. 2006)	Plasma	DHF/DSS	22	638.75	56.875	23	573.125	21.875
VEGF	81	1845.5	97.4033	NA	(Furuta et al. 2012)	Plasma	DSS	19	684.5	238.1	62	2530	635
VEGF	62	-87.7	18.427	2-3	(Kumar et al. 2012)	Sera	DHF/DSS	44	380	32.3	18	292.3	75.4
VEGF	62	38.5	10.8996	4-7	(Kumar et al. 2012)	Sera	DHF/DSS	44	232.3	26.2	18	270.8	43.1
VEGF	20	-18	22.5746	NA	(Misra, Kalita, and Singh 2014)	Sera	DSS	12	58.3	71.8	8	40.3	25.3
VEGF	106	137.763	39.1517	1-9	(Thakur et al. 2016)	Sera	SD	58	290.407	167.17	48	428.17	224.61
VEGF	34	-8.96429	15.9216	1-3	(Singla et al. 2016)	Plasma	SD	24	46.25	65.8937	10	37.2857	26.9412
VEGF	53	12.5834	17.2255	4-6	(Singla et al. 2016)	Plasma	SD	26	40.2473	60.6085	27	52.8307	64.7818
VEGF	12	44.7619	39.0899	7-10	(Singla et al. 2016)	Plasma	SD	3	50.9524	52.549	9	95.7143	73.9458
VEGF					DF			340	404.313	68.818				Random	0	99.86		269.433	539.193
VEGF	743				SDI						315	503.783	64.013	Random	0	99.885	0.289902	378.32	629.246
VEGF					Day-matched comparison DF			110	695.991	12.636				Random	0	87.568		671.225	720.756
VEGF					Day-matched comparison SDI						115	602.83	14.817	Random	0	97.465	1.71822e-06	573.79	631.87
VEGF	225	-92.778	13.52	2-6	SDI vs DF									Random	0	99.686		-119.277	-66.28
VEGF	38	970.3	73.5	NA	(Furuta et al. 2012)	Plasma	DHF	19	684.5	238.1	19	1654.8	214.3
VEGF	20	-18	22.6	NA	(Misra, Kalita, and Singh 2014)	Sera	DHF	12	58.3	71.8	8	40.3	25.3
VEGF					DF		DHF	31	369.4	313.1				Random	0	99.13		-244.3	983
VEGF					DHF		DHF				27	846.8	807.3	Random	0	99.9	0.581	-735.4	2429
VEGF	58	476.1	494.2		DHF vs DF		DHF							Random	0	99.98		-492.4	1444.6
VEGF	62	2232.2	65.6	NA	(Furuta et al. 2012)	Plasma	DSS	19	684.5	238.1	43	2916.7	238.1
VEGF	13	-30.3	20.7	NA	(Misra, Kalita, and Singh 2014)	Sera	DSS	12	58.3	71.8	1	28	0
VEGF					DF		DSS	31	369.4	313.1				Random	0	99.13		-244.3	983
VEGF					DSS		DSS				44	2916.7	238.1				0
VEGF	75	1100.9	1131.3		DSS vs DF		DSS							Random	0	100		-1116.3	3318.2
VEGF					DF		SD	157	188.948	57.157				Random	0	97.542		76.921	300.974
VEGF					SD		SD				136	203.948	53.693	Random	0	97.572	0.84831	98.712	309.183
VEGF	293	29.57	29.249		SD vs DF		SD							Random	0	99.631		-27.758	86.897
VEGF						Sera		62	241.312	54.769				Random	0	99.558		133.967	348.657
VEGF						Sera					54	256.237	80.318	Random	0.001	99.285	0.877983	98.817	413.657
VEGF	58	17.64	43.869			Sera								Random	0	99.909		-68.342	103.623
VEGF					DF	Plasma		182	477.6	96.7				Random	0	99.83		288	667.1
VEGF					SDI	Plasma					223	608.1	67.3	Random	0	99.88	0.268	476.1	740.1
VEGF	405	157.9	47.5		SDI vs DF	Plasma								Random	0	99.98		64.8	251.1
VEGFR1	45	36.3636	3.25327	D -3 (2)	(Srikiatkhachorn et al. 2006)	Plasma	DHF/DSS	22	87.2727	10.9091	23	123.636	10.9091
VEGFR1	45	-14.5455	5.35543	D -2 (3)	(Srikiatkhachorn et al. 2006)	Plasma	DHF/DSS	22	154.545	21.8182	23	140	12.7273
VEGFR1	44	56.3636	4.66778	D -1 (4)	(Srikiatkhachorn et al. 2006)	Plasma	DHF/DSS	22	109.091	14.5455	22	165.455	16.3636
VEGFR1	44	169.091	6.66917	D 0 (5)	(Srikiatkhachorn et al. 2006)	Plasma	DHF/DSS	22	121.818	18.1818	22	290.909	25.4545
VEGFR1	45	105.455	4.33769	D 1 (6)	(Srikiatkhachorn et al. 2006)	Plasma	DHF/DSS	22	110.909	14.5455	23	216.364	14.5455
VEGFR1	103	630	76.127	NA	(Furuta et al. 2012)	Plasma	DSS	19	257.9	47.6	84	887.9	690.5
VEGFR1					DF	Plasma		129	138.152	12.785				Random	0	98.684		113.093	163.211
VEGFR1	326				SDI	Plasma					197	233.912	24.262	Random	0	99.625	0.000479825	186.359	281.465
VEGFR1					Day-matched comparison DF	Plasma		110	116.482	10.047				Random	0	97.926		96.79	136.173
VEGFR1					Day-matched comparison SDI	Plasma					113	187.117	24.242	Random	0	99.678	0.00710829	139.604	234.631
VEGFR1	223	70.577	25.717	2-6	SDI vs DF	Plasma								Random	0	99.986		20.174	120.981
VEGFR1	62	19.9	24.4	NA	(Furuta et al. 2012)	Plasma	DHF	19	257.9	47.6	43	277.8	142.9				0.895
VEGFR1	60	1269.9	58.7	NA	(Furuta et al. 2012)	Plasma	DSS	19	257.9	47.6	41	1527.8	369				0.001
VEGFR2	45	-769.231	76.4657	D -3 (2)	(Srikiatkhachorn et al. 2006)	Plasma	DHF/DSS	22	11410.3	256.41	23	10641	256.41
VEGFR2	45	-961.538	76.4657	D -2 (3)	(Srikiatkhachorn et al. 2006)	Plasma	DHF/DSS	22	11923.1	256.41	23	10961.5	256.41
VEGFR2	45	-1602.56	86.3419	D -1 (4)	(Srikiatkhachorn et al. 2006)	Plasma	DHF/DSS	22	11474.4	256.41	23	9871.79	320.513
VEGFR2	45	-2884.62	86.3419	D 0 (5)	(Srikiatkhachorn et al. 2006)	Plasma	DHF/DSS	22	11217.9	256.41	23	8333.33	320.513
VEGFR2	45	-3910.26	76.4657	D 1 (6)	(Srikiatkhachorn et al. 2006)	Plasma	DHF/DSS	22	10897.4	256.41	23	6987.18	256.41
VEGFR2	103	-6504.3	612.895	NA	(Furuta et al. 2012)	Plasma	DSS	19	16112.5	2422.5	84	9608.2	2368.3
VEGFR2					DF			129	11724.8	189.576				Random	0	98.084		11353.2	12096.3
VEGFR2	328				SDI						199	9399.85	720.321	Random	0	99.866	0.00180025	7988.05	10811.7
VEGFR2					Day-matched comparison DF			110	11384.6	167.908				Random	0	97.88		11055.5	11713.7
VEGFR2					Day-matched comparison SDI						115	9359.01	793.722	Random	0	99.893	0.0125326	7803.35	10914.7
VEGFR2	225	-2025.64	618.91	2-6	SDI vs DF									Random	0	99.993		-3238.68	-812.598
VEGFR2	62	-5239.4	623.9	NA	(Furuta et al. 2012)	Plasma	DHF	19	16112.5	2422.5	43	10873.1	1859.1				0.086
VEGFR2	60	-7830.9	644.1	NA	(Furuta et al. 2012)	Plasma	DSS	19	16112.5	2422.5	41	8281.6	2084.5				0.014
VEGFR2					DF	Plasma		184	11724.8	189.6				Random	0	98.08		11353.2	12096.3
VEGFR2					SDI	Plasma					234	9399.9	720.3	Random	0	99.87	0.002	7988	10811.7
VEGFR2	418	-2771	589.9		SDI vs DF	Plasma								Random	0	99.99		-3927.2	-1614.9
VEGFR2 bound	45	-97.0588	6.70785	D -3 (2)	(Srikiatkhachorn et al. 2006)	Plasma	DHF/DSS	22	180.882	28.6765	23	83.8235	13.2353
VEGFR2 bound	45	-125.735	5.64355	D 1 (6)	(Srikiatkhachorn et al. 2006)	Plasma	DHF/DSS	22	176.471	26.4706	23	50.7353	0
VEGFR2 bound					DF	Plasma		44	178.525	4.151				Fixed	0.597	0		170.389	186.661
VEGFR2 bound					SDI	Plasma					46	67.597	16.546	Random	0	96.522	7.88889e-11	35.166	100.027
VEGFR2 bound	90	-111.405	14.3	2-6	SDI vs DF	Plasma								Random	0	99.793		-139.433	-83.378
sVCAM-1	12	397	41.0055	1	(Murgue, Cassar, and Deparis 2001)	Plasma	DHF/DSS	11	777	136	1	1174
sVCAM-1	26	419	411.23	2	(Murgue, Cassar, and Deparis 2001)	Plasma	DHF/DSS	24	806	252	2	1225	577
sVCAM-1	37	199	294.758	3	(Murgue, Cassar, and Deparis 2001)	Plasma	DHF/DSS	34	912	505	3	1111	488
sVCAM-1	45	444	190.276	4	(Murgue, Cassar, and Deparis 2001)	Plasma	DHF/DSS	35	1111	691	10	1555	475
sVCAM-1	43	383	232.94	5	(Murgue, Cassar, and Deparis 2001)	Plasma	DHF/DSS	33	1358	672	10	1741	637
sVCAM-1	31	378	217.827	6	(Murgue, Cassar, and Deparis 2001)	Plasma	DHF/DSS	23	1450	596	8	1828	506
sVCAM-1	18	210	240.3	7	(Murgue, Cassar, and Deparis 2001)	Plasma	DHF/DSS	14	1812	560	4	2022	376
sVCAM-1	15	-257	326.593	8	(Murgue, Cassar, and Deparis 2001)	Plasma	DHF/DSS	10	1777	330	5	1520	692
sVCAM-1	97.6667	182.655	160.793	1-7	(Koraka et al., 2004)	Plasma	DSS	39.6667	808	815	58	990.655	726.87
sVCAM-1	34.5	357.772	275.857	8-13	(Koraka et al., 2004)	Plasma	DSS	6	487	617	28.5	844.772	600.413
sVCAM-1	250	772.1	17.2595	2-7	(Chen et al. 2007)	Plasma	DHF/DSS	168	2075	113.7	82	2847.1	134.6
sVCAM-1	13	28.2	13.671	3-5	(Zhao et al. 2016)	Plasma	SD	10	219	25.8	3	247.2	19
sVCAM-1	27	23.3	5.83909	6-7	(Zhao et al. 2016)	Plasma	SD	18	221.5	14.7	9	244.8	14.1
sVCAM-1	30	66.3	6.25299	8-10	(Zhao et al. 2016)	Plasma	SD	19	177.3	18.4	11	243.6	15.3
sVCAM-1	11	72.4	14.5344	14-17	(Zhao et al. 2016)	Plasma	SD	6	52.8		5	125.2	32.5
sVCAM-1					DF	Plasma		450.667	998.278	171.25				Random	0	99.97		662.634	1333.92
sVCAM-1	690.167				SDI	Plasma					239.5	1164.39	180.373	Random	0	99.957	0.504221	810.863	1517.91
sVCAM-1					Day-matched comparison DF	Plasma		184	1236.12	134.299				Random	0	95.382		972.895	1499.34
sVCAM-1					Day-matched comparison SDI	Plasma					43	1671.7	79.669	Fixed	0.11	42.066	0.0052793	1515.55	1827.85
sVCAM-1	227	290.154	44.957	1-8	SDI vs DF	Plasma								Random	0	91.991		202.04	378.267
sVCAM-1	57	-34	226.3	1-7	(Koraka et al., 2004)	Plasma	DHF	40	808	815	17	774	773
sVCAM-1	10	99	431.3	8-13	(Koraka et al., 2004)	Plasma	DHF	6	487	617	4	586	655
sVCAM-1					DF		DHF	46	741.4	114.7				Fixed	0.257	22.31		516.6	966.3
sVCAM-1					DHF		DHF				21	727.6	162.7	Fixed	0.618	0	0.945	408.7	1046.5
sVCAM-1	67	-27.9	29.3		DHF vs DF		DHF							Fixed	0.341	0		-85.3	29.5
sVCAM-1	80	275	168.3	1-7	(Koraka et al., 2004)	Plasma	DSS	40	808	815	41	1083	686
sVCAM-1	31	394	277.7	8-13	(Koraka et al., 2004)	Plasma	DSS	6	487	617	25	881	585
sVCAM-1					DF		DSS	46	741.4	114.7				Fixed	0.257	22.31		516.6	966.3
sVCAM-1					DSS		DSS				66	990.9	79	Fixed	0.203	38.32	0.073	836	1145.7
sVCAM-1	111	325.5	58.8		DSS vs DF		DSS							Random	0.026	79.93		210.2	440.8
sVCAM-1					DF		SD	53	205.7	16.2				Random	0	97.09		173.9	237.6
sVCAM-1					SD		SD				28	218.3	16.2	Random	0	95.34	0.583	186.6	250
sVCAM-1	81	47.5	14.4		SD vs DF		SD							Random	0	99.62		19.4	75.6
sICAM-1	50	51	16.1286	1-10	(Elzinandes L Azeredo et al. 2006)	Plasma	DHF/DSS	31	149	59	19	200	53
sICAM-1	26	23.4848	64.8875	5	(Khongphatthanayothin, Phumaphuti, Thongchaiprasit, & Poovorawan, 2006)	Sera	DHF/DSS	11	437.229	168.661	15	460.714	156.094
sICAM-1	32	5.06	4.72147	5-9	(Valero et al., 2008)	Sera	DHF/DSS	17	68.13	6.46	15	73.19	17.25
sICAM-1	111	102.005	42.5417	1-7	(Conroy et al. 2015)	Sera	DHF/DSS	65	375.13	153.63	46	477.135	257.968
sICAM-1	13	11.9	9.33715	3-5	(Zhao et al. 2016)	Plasma	SD	10	21.2	6.3	3	33.1	15.8
sICAM-1	27	-5.1	3.63402	6-7	(Zhao et al. 2016)	Plasma	SD	18	35	11.7	9	29.9	7.1
sICAM-1	30	2.4	2.91056	8-10	(Zhao et al. 2016)	Plasma	SD	19	31	7.1	11	33.4	8
sICAM-1	11	33.5	6.51918	14-17	(Zhao et al. 2016)	Plasma	SD	6	12.8	3.1	5	46.3	14.3
sICAM-1					DF			177	100.209	11.702				Random	0	99.459		77.273	123.145
sICAM-1					SDI						123	128.244	15.43	Random	0	98.589	0.147707	98.001	158.487
sICAM-1	300	27.707	6.002	1-17	SDI vs DF									Random	0	99.513		15.944	39.471
sICAM-1					DF		SD	53	24.9	5.3				Random	0	97.15		14.5	35.3
sICAM-1					SD		SD				28	33.8	2.7	Fixed	0.111	50.03	0.136	28.4	39.1
sICAM-1	81	10.5	5.4		SD vs DF		SD							Random	0	99.2		-0.2	21.2
sICAM-1					DF	Sera		93	290.8	129.5				Random	0	99.36		37	544.6
sICAM-1					SDI	Sera					76	335.3	161.5	Random	0	99	0.83	18.8	651.8
sICAM-1	169	43.7	37.9		SDI vs DF	Sera								Random	0	99.64		-30.7	118.1
sICAM-1					DF	Plasma		202	43.573	7.448				Random	0	98.396		28.974	58.171
sICAM-1					SDI	Plasma					139	65.217	13.059	Random	0	97.92	0.149951	39.623	90.811
sICAM-1	341	18.604	6.939		SDI vs DF	Plasma								Random	0	99.522		5.003	32.205
IFN-a2				1	(Kurane et al. 1993)	Sera	DHF/DSS	4	24.36	34.8349
IFN-a2	7	8.25251	11.186	2	(Kurane et al. 1993)	Sera	DHF/DSS	4	7.05643	10.8581	3	15.3089	16.9397
IFN-a2	18	9.25691	12.3572	3	(Kurane et al. 1993)	Sera	DHF/DSS	6	15.0106	13.4675	12	24.2675	38.3362
IFN-a2	25	9.10265	4.62294	4	(Kurane et al. 1993)	Sera	DHF/DSS	5	0.957982	0.0931527	20	10.0606	20.6736
IFN-a2	26	2.91435	4.12822	5	(Kurane et al. 1993)	Sera	DHF/DSS	4	3.62067	5.2988	22	6.53503	14.8494
IFN-a2	36	20.1117	10.0565	6-7	(Kurane et al. 1993)	Sera	DHF/DSS	4	0.974989	0.0981916	32	21.0867	56.8877
IFN-a2	27	17.2399	7.05747	10-20	(Kurane et al. 1993)	Sera	DHF/DSS	4	2.0135	1.17029	23	19.2534	33.7299
IFN-a2	41	13	4.41653	6-11	(Libraty et al. 2002)	Plasma	DHF/DSS	12	55	10	29	68	18
IFN-a2	99	32.7	9.24824	2-7	(R.-F. Chen et al. 2005)	Plasma	DHF/DSS	66	94.1	28	33	126.8	49.3
IFN-a2	250	-15.3	0.918231	2-7	(Chen et al. 2007)	Plasma	DHF/DSS	168	36.1	9.4	82	20.8	5.1
IFN-a2	78	18.67	45.8007	4-5, 10-14	(Malavige et al. 2013)	Sera	SD	20	83.33	167.4	58	102	201
IFN-a2	71	1.5	0.64906	1-5	(Oliveira et al. 2016)	Sera/plasma	DHF/DSS	44	1.7	2.4	27	3.2	2.8
IFN-a2	34	-26.8852	27.6493	1-3	(Singla et al. 2016)	Plasma	SD	24	71.0526	90.9777	10	44.1675	64.7775
IFN-a2	31	-17.4081	15.4035	4-6	(Singla et al. 2016)	Plasma	SD	16	40.0748	55.6941	15	22.6667	25.5152
IFN-a2	12	-9.59064	23.3288	7-10	(Singla et al. 2016)	Plasma	SD	3	28.0702	36.9522	9	18.4795	28.3142
IFN-a2	13	85.5792	31.1938	3-5	(Zhao et al. 2016)	Plasma	SD	10	53.2085	8.45611	3	138.788	53.8304
IFN-a2	27	-6.80394	0	6-7	(Zhao et al. 2016)	Plasma	SD	18	72.646		9	65.8421
IFN-a2	30	28.0056	0	8-10	(Zhao et al. 2016)	Plasma	SD	19	51.4926		11	79.4982
IFN-a2	11	8.50693	19.8178	14-17	(Zhao et al. 2016)	Plasma	SD	6	75.6843	21.8881	5	84.1912	39.5537
IFN-a2					DF			437	20.406	1.055				Random	0	99.59		18.338	22.475
IFN-a2	836				SDI						403	35.529	4.796	Random	0	98.536	0.00207263	26.129	44.93
IFN-a2					Day-matched comparison DF			19	4.484	2.438				Fixed	0.034	65.382		-0.295	9.263
IFN-a2					Day-matched comparison SDI						57	8.97	2.472	Fixed	0.389	0.52	0.196337	4.126	13.815
IFN-a2	76	7.047	2.267	2-5	SDI vs DF									Random	0	89.153		2.603	11.491
IFN-a2	11	-45.1909	28.6178	4	(Kurane et al. 1993)	Sera	DHF	2	50.1584	40.2579	9	4.96748	8.81441
IFN-a2	14	-7.58313	6.85668	5	(Kurane et al. 1993)	Sera	DHF	6	11.7728	15.6924	8	4.18964	6.91209
IFN-a2	24	-4.4107	4.39012	6	(Kurane et al. 1993)	Sera	DHF	6	9.28592	10.349	18	4.87522	5.06076
IFN-a2	14	2.77022	2.70631	7	(Kurane et al. 1993)	Sera	DHF	4	1.02472	0.0673552	10	3.79494	8.55744
IFN-a2	8	-0.369795	8.26057	8	(Kurane et al. 1993)	Sera	DHF	3	4.67202	6.34027	5	4.30223	16.5586
IFN-a2				9	(Kurane et al. 1993)	Sera	DHF	3	1.01533	0.00669366
IFN-a2				12-14	(Kurane et al. 1993)	Sera	DHF				8	4.37118	7.27323
IFN-a2				15-18	(Kurane et al. 1993)	Sera	DHF	4	2.02177	1.15322
IFN-a2					DF		DHF	28	1.01	0.05				Fixed	0.019	62.941		0.912	1.107
IFN-a2					DHF		DHF				58	4.634	0.884	Fixed	0.999	0	4.25817e-05	2.901	6.366
IFN-a2	71	-5.913	3.023		DHF vs DF		DHF							Random	0	95.067		-11.837	0.012
IFN-a2	6	-46.0266	28.6607	4	(Kurane et al. 1993)	Sera	DSS	2	50.1584	40.2579	4	4.13183	6.65892
IFN-a2	12	-8.07298	6.57286	5	(Kurane et al. 1993)	Sera	DSS	6	11.7728	15.6924	6	3.69979	3.60042
IFN-a2	15	-5.94468	4.26587	6	(Kurane et al. 1993)	Sera	DSS	6	9.28592	10.349	9	3.34124	1.76824
IFN-a2	14	2.07057	0.363074	7	(Kurane et al. 1993)	Sera	DSS	4	1.02472	0.0673552	10	3.09528	1.14319
IFN-a2	9	-2.93495	3.67623	8	(Kurane et al. 1993)	Sera	DSS	3	4.67202	6.34027	6	1.73707	0.830567
IFN-a2				9	(Kurane et al. 1993)	Sera	DSS	3	1.01533	0.00669366
IFN-a2				12-14	(Kurane et al. 1993)	Sera	DSS				8	4.89704	4.05423
IFN-a2				15-18	(Kurane et al. 1993)	Sera	DSS	4	2.02177	1.15322
IFN-a2					DF		DSS	28	1.01	0.05				Fixed	0.019	62.941		0.912	1.107
IFN-a2					DSS		DSS				43	2.571	0.216	Fixed	0.014	64.989	1.91314e-12	2.148	2.994
IFN-a2	56	-5.537	2.796		DSS vs DF		DSS							Random	0	96.428		-11.018	-0.056
IFN-a2					DF		SD	116	54.6	2.5				Fixed	0.08	49.19		49.8	59.5
IFN-a2					SD		SD				120	59.7	15.1	Random	0	84.33	0.739	30.1	89.4
IFN-a2	236	9.1	12.3		SD vs DF		SD							Random	0	97.18		-15	33.3
IFN-a2					DF	Sera		51	1.004	0.033				Fixed	0.012	61.264		0.939	1.07
IFN-a2					SDI	Sera					170	11.297	2.251	Fixed	0.006	66.643	4.82761e-06	6.885	15.708
IFN-a2	217	11.236	3.002		SDI vs DF	Sera								Random	0	96.346		5.352	17.119
IFN-a2					DF	Plasma		342	58	8.8				Random	0	97.97		40.8	75.3
IFN-a2					SDI	Plasma					206	61.4	13.6	Random	0	98.11	0.834	34.7	88.2
IFN-a2	548	8.1	9.1		SDI vs DF	Plasma								Random	0	99.85		-9.7	26
IFN-b	30	-117.949	11.9582	4	(Ubol et al. 2010)	Plasma	DHF/DSS	15	182.051	46.1538	15	64.1026	3.84615
IFN-b	77	-3.1	10.8503	1-5	(Oliveira et al. 2016)	Sera/plasma	DHF/DSS	44	52.2	49.8	33	49.1	45
IFN-b					DF			59	116.819	64.949				Random	0	98.823		-10.479	244.117
IFN-b					SDI						48	63.868	0.974	Fixed	0.057	72.299	0.41497	61.96	65.776
IFN-b	107	-60.486	57.4		SDI vs DF									Random	0	99.952		-172.988	52.016
IFN-g	15	7.35492	25.0917	5	(Ferreira et al. 2015)	Plasma	DHF/DSS	8	36.2072	61.3839	7	43.5621	33.319
IFN-g	36	3.68964	9.48434	7	(Ferreira et al. 2015)	Plasma	DHF/DSS	7	17.7003	19.8855	29	21.3899	31.1515
IFN-g	34	13.2225	29.2673	8	(Ferreira et al. 2015)	Plasma	DHF/DSS	13	48.4844	85.0724	21	61.7069	79.354
IFN-g	19	41.2216	23.3683	9	(Ferreira et al. 2015)	Plasma	DHF/DSS	5	8.21253	6.76209	14	49.4341	86.701
IFN-g	27	32.8906	16.7008	10	(Ferreira et al. 2015)	Plasma	DHF/DSS	5	7.15313	6.25812	22	40.0438	77.2261
IFN-g	22	37.0874	18.2447	11	(Ferreira et al. 2015)	Plasma	DHF/DSS	4	11.1959	10.4192	18	48.2834	74.1832
IFN-g	12	5.21098	4.24119	12	(Ferreira et al. 2015)	Plasma	DHF/DSS	6	3.30889	4.71998	6	8.51987	9.25461
IFN-g	3	5.0175	1.69919	13	(Ferreira et al. 2015)	Plasma	DHF/DSS	1	0.0962351		2	5.11373	2.40301
IFN-g	2	0.829884	0	16	(Ferreira et al. 2015)	Plasma	DHF/DSS	1	0.0962351		1	0.926119
IFN-g	51	18	16.3183	2	(Pandey et al. 2015)	Sera	SD	30	44.5	60.5569	21	62.5	55
IFN-g	71	35.8871	21.7253	3	(Pandey et al. 2015)	Sera	SD	31	76.6129	78.0212	40	112.5	105
IFN-g	62	22.5	17.2435	4	(Pandey et al. 2015)	Sera	SD	24	47.5	59.8625	38	70	75
IFN-g	27	4.5	13.3892	5	(Pandey et al. 2015)	Sera	SD	5	30.5	28.7533	22	35	17.5
IFN-g				1-2	(Kurane et al. 1991)	Sera	DHF/DSS	22	2.17764	3.90444
IFN-g	42	2.63253	1.57459	3-4	(Kurane et al. 1991)	Sera	DHF/DSS	18	1.17143	0.737369	24	3.80395	7.66675
IFN-g				5-6	(Kurane et al. 1991)	Sera	DHF/DSS				33	0.715549	1.80364
IFN-g				7-8	(Kurane et al. 1991)	Sera	DHF/DSS				18	0.301618	0.623593
IFN-g	68	-0.0495661	0.0391589	10-20	(Kurane et al. 1991)	Sera	DHF/DSS	36	0.177544	0.195858	32	0.127978	0.122357
IFN-g	30	-4.67335	12.5406	1-5	(Braga et al. 2001)	Sera	DHF/DSS	15	63.8273	33.1293	15	59.1539	35.5169
IFN-g	41	80	13.4401	6-11	(Libraty et al. 2002)	Plasma	DHF/DSS	12	138	31	29	218	54
IFN-g	99	-46	3.02297	2-7	(R.-F. Chen et al. 2005)	Plasma	DHF/DSS	66	130.2	16.9	33	84.2	12.6
IFN-g	32	-3.45	8.08424	1-18	(Chen et al. 2006)	Sera	DHF/DSS	12	34.6	22.6	20	31.15	21.3502
IFN-g	250	-15.4	1.02495	2-7	(Chen et al. 2007)	Plasma	DHF/DSS	168	52.5	7.2	82	37.1	7.8
IFN-g	27	-6.25	11.6531	1-5	(Restrepo et al. 2008)	Sera	DHF/DSS	18	20.11	30.9	9	13.86	27.29
IFN-g	105	3.90266	9.9455	2-5	(Priyadarshini et al. 2010)	Plasma	DHF/DSS	74	22.9567	65.0713	31	26.8593	35.9511
IFN-g	109	-21.3574	12.1907	6-15	(Priyadarshini et al. 2010)	Plasma	DHF/DSS	79	27.6305	107.552	30	6.27315	8.10364
IFN-g	62	-513.5	40.6645	2-3	(Kumar et al. 2012)	Sera	DHF/DSS	44	770.3	262.2	18	256.8	40.5
IFN-g	62	-137.8	19.5626	4-7	(Kumar et al. 2012)	Sera	DHF/DSS	44	408.1	110.8	18	270.3	43.2
IFN-g	78	-94.8	84.9058	4-5, 10-14	(Malavige et al. 2013)	Sera	SD	20	268.8	346.2	58	174	265.6
IFN-g	81	-8.22222	3.58686	NA	Soundravally et al. 2014	Plasma	DSS	27	28.3	18.5	54	20.0778	3.20016
IFN-g	83	8.6	3.95003	0-2	(de la Cruz Hernández et al. 2016)	Sera	DHF/DSS	51	45.7	5.6	32	54.3	21.9
IFN-g	88	2.7	3.70561	3-5	(de la Cruz Hernández et al. 2016)	Sera	DHF/DSS	50	50.1	18	38	52.8	16.6
IFN-g	31	-9.44114	5.11235	1-3	(Singla et al. 2016)	Plasma	SD	21	16.8022	21.3715	10	7.36111	6.62312
IFN-g	50	1.13194	8.31767	4-6	(Singla et al. 2016)	Plasma	SD	25	14.7639	17.6961	25	15.8958	37.6356
IFN-g	11	0.266204	2.10246	7-10	(Singla et al. 2016)	Plasma	SD	3	3.51852	2.97019	8	3.78472	3.44053
IFN-g	13	-14.0709	16.1058	3-5	(Zhao et al. 2016)	Plasma	SD	10	70.696	30.7004	3	56.6252	22.2583
IFN-g	27	14.0107	5.68646	6-7	(Zhao et al. 2016)	Plasma	SD	18	27.1476		9	41.1583	17.0594
IFN-g	30	18.5376	6.79047	8-10	(Zhao et al. 2016)	Plasma	SD	19	13.197	3.50944	11	31.7346	22.3626
IFN-g	11	4.9148	3.29612	14-17	(Zhao et al. 2016)	Plasma	SD	6	8.46653	1.77852	5	13.3813	7.18931
IFN-g					DF			998	41.619	2.782				Random	0	99.82		36.167	47.071
IFN-g	1811				SDI						886	37.537	1.646	Random	0	99.574	0.206656	34.31	40.763
IFN-g					Day-matched comparison DF			140	21.765	4.351				Random	0	83.63		13.238	30.292
IFN-g					Day-matched comparison SDI						241	42.547	7.146	Random	0	93.012	0.0129921	28.542	56.553
IFN-g	381	18.625	3.471	2-16	SDI vs DF									Random	0	96.778		11.822	25.427
IFN-g				1-2	(Kurane et al. 1991)	Sera	DHF	22	2.17764	3.90444
IFN-g	28	2.38398	1.63539	3-4	(Kurane et al. 1991)	Sera	DHF	18	1.17143	0.737369	10	3.55541	5.14228
IFN-g				5-6	(Kurane et al. 1991)	Sera	DHF				31	0.318315	0.220618
IFN-g				7-8	(Kurane et al. 1991)	Sera	DHF				17	0.182587	0.139394
IFN-g				10-20	(Kurane et al. 1991)	Sera	DHF	36	0.177544	0.195858
IFN-g	57	-9.2	3.60221	NA	Soundravally et al. 2014	Plasma	DHF	27	28.3	18.5	30	19.1	3
IFN-g					DF		DHF	103	2.035	0.704				Random	0	97.086		0.655	3.416
IFN-g					DHF		DHF				88	5.387	0.601	Random	0	99.749	0.000293169	4.21	6.565
IFN-g	85	-3.394	5.8		DHF vs DF		DHF							Random	0	99.763		-14.762	7.974
IFN-g				1-2	(Kurane et al. 1991)	Sera	DSS	22	2.17764	3.90444
IFN-g	21	10.1516	3.41115	3-4	(Kurane et al. 1991)	Sera	DSS	18	1.17143	0.737369	3	11.323	5.90062
IFN-g				5-6	(Kurane et al. 1991)	Sera	DSS				20	0.284384	0.173262
IFN-g				7-8	(Kurane et al. 1991)	Sera	DSS				23	0.142734	0.0417283
IFN-g				10-20	(Kurane et al. 1991)	Sera	DSS	36	0.177544	0.195858
IFN-g	51	-7	3.61261	NA	Soundravally et al. 2014	Plasma	DSS	27	28.3	18.5	24	21.3	3
IFN-g					DF		DSS	103	2.035	0.704				Random	0	97.086		0.655	3.416
IFN-g					DSS		DSS				70	10.955	8.543	Random	0	99.831	0.29806	-5.79	27.699
IFN-g	72	1.591	8.6		DSS vs DF		DSS							Random	0	99.728		-15.264	18.447
IFN-g					DF		SD	212	21.4	3				Random	0	92.38		15.6	27.3
IFN-g					SD		SD				250	38.5	5.7	Random	0	95.25	0.008	27.2	49.8
IFN-g	462	3.4	3.5		SD vs DF		SD							Random	0	98.72		-3.4	10.2
IFN-g					DF	Sera		420	40.694	2.841				Random	0	99.716		35.125	46.263
IFN-g					SDI	Sera					436	32.387	1.631	Random	0	99.354	0.011219	29.19	35.584
IFN-g	783	-49.8	7.6		SDI vs DF	Sera								Random	0	99.91		-64.7	-34.8
IFN-g					DF	Plasma		578	34	7.5				Random	0	99.7		19.3	48.7
IFN-g					SDI	Plasma					450	37	4.6	Random	0	99.03	0.736	28	46
IFN-g	1028	7.1	4		SDI vs DF	Plasma								Random	0	99.88		-0.7	14.8
sTRAIL	30	-19.8347	9.61577	NA	(Arias et al. 2014)	Sera	SD	22	101.653	29.7257	8	81.8182	20.4545
sTRAIL	63	-432.134	87.5959	1-11	(Limonta et al. 2014)	Plasma	SD	50	695.161	567.057	13	263.027	127.066
sTRAIL					DF		SD	72	393.065	296.701				Random	0	98.163		-188.459	974.589
sTRAIL					SDI		SD				21	169.116	90.54	Random	0	96.055	0.470336	-8.34	346.572
sTRAIL	93	-225.806	206.15	1-11	SDI vs DF		SD							Random	0	99.927		-629.852	178.24
MMP-9	23	-147.812	59.4466	1-5	(Voraphani et al. 2010)	Sera	DHF/DSS	15	277.5	211.339	8	129.688	66.7108

## Sheet: 5- summary of biomarkers
Biomarkers	Total number of studies	Total number of respondents (all studies)	DF					DHF					DHF vs DF
			Total number of respondents	Heterogeneity , I2, %	Effect size (mean cytokine level, pg/ml)	95% CI		Total number of respondents	Heterogeneity , I2, %	Effect size (mean cytokine level, pg/ml)	95% CI		Total number of respondents	Heterogeneity , I2, %	Effect size (mean cytokine level, pg/ml)	95% CI		p-value	DF (SE)	DHF (SE)	DHF vs DF (SE)	no.
						Lower limit	Upper limit				Lower limit	Upper limit				Lower limit	Upper limit
Biomarkers that show significant difference between DF and DHF and correlates with severity
VEGFR2	3	418	110	97.88	11384.6	11055.5	11713.7	115	99.89	9359	7803.3	10914.7	225	99.99	-2025.6	-3238.7	-812.6	0.002	329.1	1555.7	1213.1	7
IL-8	7	872	90	0	197.6	167.3	227.9	121	88.24	381.1	282.5	479.8	211	98.86	189	124.8	253.2	0	30.3	98.6	64.2	6
IL-18	3	177	120	95.62	154.9	64.3	245.5	57	2.69	335.7	289.4	382	177	99.45	179.4	68.1	290.7	0	90.6	46.3	111.3	5
RANTES	3	201	137	99.14	206.8	121.1	292.4	64	96.38	79.8	44.3	115.2	201	99.83	-111.1	-162.1	-60.2	0.007	85.7	35.5	51	4
IL-10	13	1909	397	96.67	32.6	27.2	38.1	587	97.99	61.4	51.1	71.7	984	99.75	23.2	18.1	28.4	0	5.4	10.3	5.1	3
TGF-b	3	309	90	22.25	62.7	53.9	71.6	121	98.58	60.7	12.4	109.1	211	98.44	-10	-23.1	3.2	0	8.8	48.3	13.1	2
IL-7	1	95	47	39.1	7.8	5.8	9.9	48	51.73	2.6	1.7	3.5	95	97.59	-4.8	-7.7	-2	0	2	0.9	2.9	1
Biomarkers that show no significant difference between DF and DHF
CXCL10	5	617	82	94.68	9192.8	6562.3	11823.3	222	96.7	26233.4	20589	31877.8	304	98.78	11899	9334.1	14463.9	0.71	2630.5	5644.4	2564.9	29
MIF	4	325	102	0	9614.2	8195.7	11032.7	46	0	8240.3	6854.3	9626.2	148	93.48	1053.4	-1327.2	3434.1	0	1418.5	1386	2380.6	28
sTNF-R2	5	329	68	91.03	1795.3	1410.7	2180	66	41.18	2628.9	2358.6	2899.2	134	86.86	818	676.9	959.1	0.223	384.6	270.3	141.1	27
IL-2r	4	325	55	87.06	1515.7	1188.8	1842.6	82	73.47	1984.2	1729.5	2238.8	137	96.17	441.5	251.3	631.7	0.448	326.9	254.7	190.2	26
sVCAM-1	4	690	184	95.38	1236.1	972.9	1499.3	43	42.07	1671.7	1515.5	1827.8	227	91.99	290.2	202	378.3	0.504	263.2	156.2	88.2	25
sTRAIL	2	93	72	98.16	393.1	-188.5	974.6	21	96.06	169.1	-8.3	346.6	93	99.93	-225.8	-629.9	178.2	0.47	581.6	177.4	404.1	24
IL-2	2	168	81	35.55	68.7	39.1	98.2	153	62.39	29.7	16.5	42.9	168	99.52	-184.5	-592.7	223.7	0.018	29.6	13.2	408.2	23
L-Selectin	1	227	184	0	1492.6	1431.6	1553.7	43	88.8	1313.7	1150.6	1476.8	227	85.18	-143.8	-200.5	-87.2	0.044	61	163.1	56.7	22
VEGFR2 bound	1	90	44	0	178.5	170.4	186.7	46	96.52	67.6	35.2	100	90	99.79	-111.4	-139.4	-83.4	0	8.1	32.4	28	21
sTNF-R1	3	257	67	58.13	146.9	112.8	181	65	75.45	246	162.7	329.3	132	93.31	98.2	60.3	136.1	0.613	34.1	83.3	37.9	20
VEGF	7	743	110	87.57	696	671.2	720.8	115	97.47	602.8	573.8	631.9	225	99.69	-92.8	-119.3	-66.3	0.29	24.8	29	26.5	19
IL-12	5	281	73	60.18	651.3	598.5	704	70	66.35	472.1	433.1	511.1	143	99.23	-92.3	-127.4	-57.2	0.522	52.8	39	35.1	18
VEGFR1	2	326	110	97.93	116.5	96.8	136.2	113	99.68	187.1	139.6	234.6	223	99.99	70.6	20.2	121	0.007	19.7	47.5	50.4	17
IFN-b	2	107	59	98.82	116.8	-10.5	244.1	48	72.3	63.9	62	65.8	107	99.95	-60.5	-173	52	0.415	127.3	1.9	112.5	16
MCP-1	5	371	43	72.83	149.3	121.7	177	84	86.44	190.1	106.4	273.9	127	96.29	38.7	-4.4	81.7	0.141	27.6	83.7	43.1	15
sICAM-1	5	300	177	99.46	100.2	77.3	123.1	123	98.59	128.2	98	158.5	300	99.51	27.7	15.9	39.5	0.148	22.9	30.2	11.8	14
IL-1a	1	81	53	96.74	161.3	51.7	270.8	28	0.94	204.3	172.5	236	81	99.55	26.3	-92.2	144.7	0.46	109.6	31.8	118.5	13
IL-21	1	241	144	0	148	112	183.9	97	59.69	121.5	98.6	144.5	241	98.99	-24.6	-67.3	18.1	0.224	36	22.9	42.7	12
IL-17	5	630	99	96.78	9.8	6	13.5	63	84.11	28.3	19.4	37.1	162	99.23	20.4	12.4	28.4	0.529	3.8	8.9	8	11
IFN-g	16	1811	140	83.63	21.8	13.2	30.3	241	93.01	42.5	28.5	56.6	381	96.78	18.6	11.8	25.4	0.207	8.6	14	6.8	10
IL-1ra	1	81	53	98.65	94.4	55.8	133	28	0	113.5	104.5	122.4	81	99.51	16.8	-20.5	54.1	0.346	38.6	9	37.3	9
P-Selectin	1	227	184	31.35	46.6	41.9	51.3	43	72	28	24.3	31.6	227	95.95	-15.6	-21.2	-10	0	4.7	3.7	5.6	8
TNF-a	20	1819	233	90.61	6.6	5.3	7.9	528	97.94	18.9	16.7	21.1	760	99.92	11.5	9.5	13.6	0.003288	1.3	2.2	2	7
IFN-a2	8	836	19	65.38	4.5	-0.3	9.3	57	0.52	9	4.1	13.8	76	89.15	7	2.6	11.5	0.002	4.8	4.9	4.4	6
sST2	4	507	71	0	6	5.3	6.7	225	0	7.2	6.6	7.7	296	97.4	1.5	0.7	2.3	0.18	0.7	0.6	0.8	5
IL-1b	4	552	177	93.97	1.8	1.1	2.6	375	96.83	2.2	1.5	2.8	552	99.95	1	0	2	0.734825	0.7	0.7	1	4
IL-4	2	227	107	99.91	9.3	5.4	13.2	120	96.58	8.3	6.9	9.6	227	99.99	-1	-4.2	2.2	0.63	3.9	1.4	3.2	3
IL-6	10	845	40	81.02	9.9	-5.2	25	48	0	11.5	6.8	16.1	88	98.75	0.7	-10.4	11.8	0	15.1	4.7	11.1	2
IL-13	3	314	119	49.57	17.8	11.9	23.7	46	45.52	11.6	5.6	17.7	165	95.84	-0.6	-7.9	6.6	0.455	5.9	6	7.3	1
Insufficient data to perform meta-analysis
MMP-2	1	82	42		690474			40		843179			82		152705
CXCL11	1	21	7		662.6			14		1128.1			21		465.5
MMP-9	1	23	15		277.5			8		129.7			23		-147.8
CXCL9	1	18	5		59			13		174.2			18		115.2
IL-9	1	103	19		153.1			84		221.4			103		68.3
MIP-1b	1	40	21		146.9			19		94.2			40		-52.6
IL-18FP	1	74	62		65.7			12		102.9			74		37.2
Eotaxin-1	1	81	53	0	93.7	0	0	28	22.37	136.9	126.4	147.5	81	96.12	22.1	-0.2	44.4	0.002
IL-33	1	40	26		135.5			14		116.9			40		-18.6
sE-selectin	1	27	11		63.9			16		75.7			27		11.9
IL-18BP	1	76	64		18.2			12		15.9			76		-2.3
Suitable time to measure severity biomarkers
Biomarkers	Study	Days in which biomarkers levels show peak difference (days of fever/ illness)	Days of study	Number of measured time point	WHO classification	Proposed days of fever of measurement																	days of study
IL-7	[(Singla et al., 2016)]	1-3 Days of fever	1-10	3	SD	1-3															20	19	1	2	3	4	5	6	7	8	9	10
IL-8	[(Priyadarshini et al., 2010)]	2-5 Days of fever	2-15	2	DHF/DSS	1-5															21	18	2	3	4	5	6	7	8	9	10	11	12	13	14	15
	[(de la Cruz Hernández et al., 2016)]	0-2 Days of fever	0-5	2	DHF/DSS																22	17	0	1	2	3	4	5
	[(Pandey et al., 2015)]	2 (-3) Days of fever**	2-5	4	SD																23	16	2	3	4	5
	[(Singla et al., 2016)]	1-3 Days of fever	1-10	3	SD																24	15	1	2	3	4	5	6	7	8	9	10
	[(Zhao et al., 2016)]	3-5 Day of illness	3-17	4	SD																25	14	3	4	5	6	7	8	9	10	11	12	13	14	15	16	17
TGF-b	[(Pandey et al., 2015)]	5 Days of fever	2-5	4	SD	5															26	13	2	3	4	5
	[(Agarwal et al., 1999)]*	9-18 Day of illness	1-18	3	DHF/DSS																27	12	1	2	3	4	5	6	7	8	9	10	11	12	13	14	15	16	17	18
VEGFR2	[(A. Srikiatkhachorn et al., 2006)]*	6 (1) Days of fever**	2-6	5	DHF/DSS	6															28	11	2	3	4	5	6
IL-10	[(S Green et al., 1999)]	4 (-1) Day of fever**	2-6	5	DHF/DSS	4-10															29	10	2	3	4	5	6
	[(Ferreira et al., 2015)]	8 Days of fever	5-16	9	DHF/DSS																30	9	5	6	7	8	9	10	11	12	13	14	15	16
	[(Perez et al., 2004)]	4-5 Day of illness	1-6	3	DHF/DSS																31	8	1	2	3	4	5	6
	[(Chunhakan et al., 2015)]	4 (-1) Days of fever**	3-7	5	DSS																32	7	3	4	5	6	7
	[(Pandey et al., 2015)]	4 Days of fever	2-5	4	SD																33	6	2	3	4	5
	[(Fernando et al., 2016)]*	5 Days of fever	3-8	6	SD																34	5	3	4	5	6	7	8
	[(Singla et al., 2016)]	7-10 Days of fever	1-10	3	SD																35	4	1	2	3	4	5	6	7	8	9	10
	[(Zhao et al., 2016)]*	8-10 Day of illness	3-17	4	SD																36	3	3	4	5	6	7	8	9	10	11	12	13	14	15	16	17
RANTES	[(Perez et al., 2004)]	4-5 Day of illness	1-6	3	DHF/DSS	14-17															37	2	1	2	3	4	5	6
	[(Zhao et al., 2016)]	14-17 Day of illness	3-17	4	SD																38	1	3	4	5	6	7	8	9	10	11	12	13	14	15	16	17
* represents significant difference between dengue fever and severe dengue infections at the measured time point (p < 0.05)
** number represents days of fever obtained by adding 5 to the days of defeverscence (number in bracket)
																							1	1	1	1	1	1	1	1	1	1	1	1	1	1	1	1	1	1	1	1
																							2	2	2	2	2	2	2	2	2	2	2	2	2	2	2	2	2	2	2	2
																							3	3	3	3	3	3	3	3	3	3	3	3	3	3	3	3	3	3	3	3
																							4	4	4	4	4	4	4	4	4	4	4	4	4	4	4	4	4	4	4	4
																							5	5	5	5	5	5	5	5	5	5	5	5	5	5	5	5	5	5	5	5
																							6	6	6	6	6	6	6	6	6	6	6	6	6	6	6	6	6	6	6	6
																							7	7	7	7	7	7	7	7	7	7	7	7	7	7	7	7	7	7	7	7
																							8	8	8	8	8	8	8	8	8	8	8	8	8	8	8	8	8	8	8	8
																							9	9	9	9	9	9	9	9	9	9	9	9	9	9	9	9	9	9	9	9
																							10	10	10	10	10	10	10	10	10	10	10	10	10	10	10	10	10	10	10	10
																							11	11	11	11	11	11	11	11	11	11	11	11	11	11	11	11	11	11	11	11
																							12	12	12	12	12	12	12	12	12	12	12	12	12	12	12	12	12	12	12	12
																							13	13	13	13	13	13	13	13	13	13	13	13	13	13	13	13	13	13	13	13
																							14	14	14	14	14	14	14	14	14	14	14	14	14	14	14	14	14	14	14	14
																							15	15	15	15	15	15	15	15	15	15	15	15	15	15	15	15	15	15	15	15
																							16	16	16	16	16	16	16	16	16	16	16	16	16	16	16	16	16	16	16	16
																							17	17	17	17	17	17	17	17	17	17	17	17	17	17	17	17	17	17	17	17
																							18	18	18	18	18	18	18	18	18	18	18	18	18	18	18	18	18	18	18	18
																							19	19	19	19	19	19	19	19	19	19	19	19	19	19	19	19	19	19	19	19

## Sheet: 6- subgroup sample
Biomarkers	Total	Mean difference	Combined std	Unit	Study name	Sera			Plasma			model	Q (p-value)	I^2	subgroup (p-value)	lower limit	upper limit
						n	es	se	n	es	se
MCP-1				pg/ml	(Lee et al. 2006)	14	48.7	100.3
MCP-1				pg/ml	(Rathakrishnan et al. 2012)	9	84.11	12.8
MCP-1				pg/ml	(de-Oliveira-Pinto et al., 2012)	7	140.625	82.6797
MCP-1				pg/ml	(Becquart et al. 2010)				30	22.2222	25.9259
MCP-1				pg/ml	(Zhao et al. 2016)				10	302.3	69.7
MCP-1				pg/ml	Sera	30	84.249	4.176				Fixed	0.082	60.079		76.065	92.434
MCP-1				pg/ml	Plasma				40	161.423	140.048	Random	0	99.352		-113.065	435.911
MCP-1	70	-77.174	22.1567	pg/ml	Sera vs Plasma										0.581765	-120.601	-33.747
MIP-1b				pg/ml	(Rathakrishnan et al. 2012)	6	102.49	12.53
MIP-1b				pg/ml	(de-Oliveira-Pinto et al., 2012)	7	0	0
RANTES				pg/ml	(Perez et al. 2004)	10	45.7378	22.8603
RANTES				pg/ml	(Zhao et al. 2016)				9	430.5	207.5
RANTES	19	-384.762	69.5434	pg/ml	Sera vs Plasma										0.0653109	-521.067	-248.457
Eotaxin				pg/ml	(Becquart et al. 2010)				30	350	357.143
Eotaxin				pg/ml	(Zhao et al. 2016)				10	104.7
C-TACK				pg/ml	(Becquart et al. 2010)				30	2437.5	968.75
CXCL10				pg/ml	(de-Oliveira-Pinto et al., 2012)	7	1517.86	334.077
CXCL10				pg/ml	(Rathakrishnan et al. 2012)	9	1114.69	250.45
CXCL10				pg/ml	(Becquart et al. 2010)				30	5454.55	5227.27
CXCL10				pg/ml	(Zhao et al. 2016)				10	344	148.8
CXCL10				pg/ml	Sera	16	1305.17	201.293				Random	0.008	85.902		910.645	1699.7
CXCL10				pg/ml	Plasma				40	2810.35	2553.7	Random	0	96.504		-2194.81	7815.52
CXCL10	56	-1505.18	406.9	pg/ml	Sera vs Plasma										0.556808	-2302.71	-707.658
SDF1-a				pg/ml	(Becquart et al. 2010)				30	616.279	162.791
IL-1a				pg/ml	(Becquart et al. 2010)				30	59.375	30.4688
IL-1a				pg/ml	(Zhao et al. 2016)				10	6.09547	2.55703
IL-1a				pg/ml	Plasma				40	32.465	26.648	Random	0	98.885		-19.765	84.696
IL-1b				pg/ml	(Pinto et al. 1999)	9	0.33	0.1
IL-1b				pg/ml	(Arias et al. 2014)	10	5.18	0.45
IL-1b				pg/ml	(Guerrero et al. 2013)				7	4.2	1.5
IL-1b				pg/ml	Sera	19	2.748	2.45				Random	0	99.891		-2.054	7.549
IL-1a				pg/ml	Plasma				7	4.2	1.5
IL-1a	66	-15.078	0.839611	pg/ml	Sera vs Plasma										0.613246	-16.7236	-13.4324
IL-1ra				pg/ml	(Pinto et al. 1999)	9	439	226
IL-1ra				pg/ml	(de-Oliveira-Pinto et al., 2012)	7	285.714	377.964
IL-1ra				pg/ml	(Becquart et al. 2010)				30	437.5	343.75
IL-1ra				pg/ml	(Michels et al. 2015)				9	3.81572	4.21646
IL-1ra				pg/ml	(Zhao et al. 2016)				10	74.5
IL-1ra				pg/ml	Sera	16	405.65	66.637				Fixed	0.343	0		275.041	536.259
IL-1ra				pg/ml	Plasma				49	216.11	216.802	Random	0	97.904		-208.822	536.259
IL-1ra	65	189.54	35.1679	pg/ml	Sera vs Plasma										0.40334	120.611	258.469
IL-2				U/ml	(Kurane et al. 1991)	27	3.18726	4.80362
IL-2				Ul/ml	Garcia et al. 2001	5	0.072	0.0311448
IL-2				pg/ml	(Hung et al. 2004)	6	1.8	2.4
IL-2				pg/ml	(Senaratne, Carr, and Noordeen 2016)				15	27.49	38.76
IL-2				pg/ml	Sera	38	2.541	0.672				Fixed	0.299	7.483		1.224	3.859
IL-2				pg/ml	Plasma				15	27.49	38.76
IL-2	53	-24.949	10.0084	pg/ml	Sera vs Plasma										0.519846	-44.5654	-5.33257
IL-2r				U/ml	(Kurane et al. 1991)	28	672.902	343.884
IL-2r				pg/ml	(Valero et al. 2008)	12	89.8	16.8
IL-2r				pg/ml	(Becquart et al. 2010)				30	375	78.125
IL-2r				pg/ml	Sera	40	377.748	291.528				Random	0	98.751		-193.636	949.132
IL-2r				pg/ml	Plasma				30	375	78.125
IL-2r	70	2.748	48.2511	pg/ml	Sera vs Plasma										0.992735	-91.8241	97.3201
IL-3				pg/ml	(Becquart et al. 2010)				30	2500	531.25
IL-4				pg/ml	(Hung et al. 2004)	6	0.2	0.5
IL-4				pg/ml	(Furuta et al. 2012)				18	5.9	1.4
IL-4	24	-5.7	0.388015	pg/ml	Sera vs Plasma										0.000125956	-6.46051	-4.93949
IL-6				pg/ml	(Pinto et al. 1999)	9	0.66	0.22
IL-6				pg/ml	(Hung et al. 2004)	6	1.4	2.2
IL-6				pg/ml	(Chen et al. 2006)	17	6.9	1.6
IL-6				pg/ml	(Restrepo et al. 2008)	7	1.9	1.1
IL-6				pg/ml	(Levy et al. 2010)	10	0.576923	0.153846
IL-6				pg/ml	(Arias et al. 2014)	10	2.21	1.03
IL-6				pg/ml	Feitosa et al. 2016	99	15.5	10.3
IL-6				pg/ml	(Becquart et al. 2010)				30	10.6061	7.57576
IL-6				pg/ml	(Priyadarshini et al. 2010)				45	3.16667	0.333333
IL-6				pg/ml	(Guerrero et al. 2013)				19	3.9	2.1
IL-6				pg/ml	(Michels et al. 2015)				6	2.36389	0
IL-6				pg/ml	(Zhao et al. 2016)				10	1.6
IL-6				pg/ml	Sera	158	3.629	0.539				Random	0	98.771		2.573	4.686
IL-6				pg/ml	Plasma				110	5.229	1.083	Random	0	93.434		3.106	7.352
IL-6	268	-1.6	0.11181	pg/ml	Sera vs Plasma										0.18596	-1.81915	-1.38085
IL-7				pg/ml	(Becquart et al. 2010)				30	22.093	22.093
IL-8				pg/ml	(Pandey et al. 2015)	70	220	46.6667
IL-8				pg/ml	(Patra et al. 2015)	49	23.45	1.56
IL-8				pg/ml	Feitosa et al. 2016	99	16.8	7.4
IL-8				pg/ml	(Priyadarshini et al. 2010)				45	3.33333	0.666667
IL-8				pg/ml	(Guerrero et al. 2013)				20	12.1	14.4
IL-8				pg/ml	(Zhao et al. 2016)				10	4	1.8
IL-8				pg/ml	Sera	218	83.446	11.571				Random	0	99.848		60.767	106.125
IL-8				pg/ml	Plasma				75	4.051	0.775	Random	0.012	77.493		2.533	5.57
IL-8	293	79.395	0.78878	pg/ml	Sera vs Plasma										7.58305e-12	77.849	80.941
IL-9				pg/ml	(Furuta et al. 2012)				18	145.1	28.4
IL-10				pg/ml	(Hung et al. 2004)	6	0.3	0.9
IL-10				pg/ml	(Perez et al. 2004)	11	1.33038	2.26807
IL-10				pg/ml	(Chen et al. 2006)	17	6.7	2.4
IL-10				pg/ml	(Pandey et al. 2015)	70	24.2424	6.06061
IL-10				pg/ml	Feitosa et al. 2016	99	37.1	14.5
IL-10				pg/ml	(Azeredo et al. 2001)				15	5.11538	2.55074
IL-10				pg/ml	(Zhao et al. 2016)				10	2.4	1.4
IL-10				pg/ml	Sera	203	13.856	5.248				Random	0	99.707		3.569	24.143
IL-10				pg/ml	Plasma				25	3.703	1.349	Random	0	91.129		1.059	6.347
IL-10	228	10.153	0.456579	pg/ml	Sera vs Plasma										0.0609678	9.2581	11.0479
IL-12				pg/ml	(Pacsa et al. 2000)	21	2.6	2.4
IL-12				pg/ml	(Braga et al. 2001)	9	2.15168	2.00037
IL-12				pg/ml	(Perez et al. 2004)	11	70.5387	74.1687
IL-12				pg/ml	(Arias et al. 2014)	10	42.72	9.85
IL-12				pg/ml	(Becquart et al. 2010)				30	2250	625
IL-12				pg/ml	(Juffrie et al. 2001)				15	164	80.7819
IL-12				pg/ml	Sera	51	16.471	4.416				Random	0	98.254		7.815	25.127
IL-12				pg/ml	Plasma				45	1203.98	1043	Random	0	99.691		-840.251	3248.22
IL-12	96	-1187.51	155.482	pg/ml	Sera vs Plasma										0.254892	-1492.26	-882.767
IL-13				pg/ml	(Mustafa et al. 2001)	21	4	3
IL-13				pg/ml	(Becquart et al. 2010)				30	6.875	15
IL-13	51	-2.875	2.81577	pg/ml	Sera vs Plasma										0.85092	-8.39391	2.64391
IL-15				pg/ml	(Elzinandes L Azeredo et al. 2006)				14	4.89203	1.09409
IL-16				pg/ml	(Becquart et al. 2010)				30	909.091	0
IL-17				pg/ml	(Jain et al. 2013)	70	1.48	0.4
IL-17				pg/ml	(Arias et al. 2014)	10	3.27	2.19
IL-17				pg/ml	(Becquart et al. 2010)				30	32.5581	44.186
IL-17				pg/ml	(Furuta et al. 2012)				18	48.2	15.8
IL-17				pg/ml	Sera	80	2.266	0.89				Random	0.01	84.991		0.522	4.011
IL-17				pg/ml	Plasma				30	45.461	3.381	Fixed	0.079	67.542		38.834	52.088
IL-17	110	-43.195	0.625252	pg/ml	Sera vs Plasma										0	-44.4205	-41.9695
IL-18				pg/ml	(Mustafa et al. 2001)	21	15	4
IL-18				pg/ml	(Michels et al. 2015)				11	66.9421	35.2729
IL-18	32	-51.9421	10.6709	pg/ml	Sera vs Plasma										0.143412	-72.8572	-31.0271
IL-18BP				ng/ml	(Michels et al. 2015)				10	4.42211	2.40088
IL-18FP				pg/ml	(Michels et al. 2015)				14	48.5715	27.3779
IL-21				pg/ml	(Vivanco-Cid et al. 2014)	78	14.5	59.4
IL-33				pg/ml	(Guerrero et al. 2013)				10	38.8	79.4
TNF-a				pg/ml	(Yadav et al. 1991)	12	6189.66	9.27672e-13
TNF-a				pg/ml	(Pinto et al. 1999)	9	2.69	0.62
TNF-a				pg/ml	(Kittigul et al. 2000)	41	4.2	15.6
TNF-a				pg/ml	(Braga et al. 2001)	15	17.9196	10.4898
TNF-a				pg/ml	(Hung et al. 2004)	6	0.8	1.2
TNF-a				pg/ml	(Chen et al. 2006)	17	1	0.3
TNF-a				pg/ml	(Restrepo et al. 2008)	7	0.76	1.01
TNF-a				pg/ml	(Levy et al. 2010)	10	12.8	1.6
TNF-a				pg/ml	(Arias et al. 2014a)	10	20.38	3.24
TNF-a				pg/ml	Feitosa et al. 2016	99	14.3	4.9
TNF-b				pg/ml	Feitosa et al. 2016	99	73.8	14.8
TNF-a				pg/ml	(Hober et al. 1998)				12	30.75	1.1
TNF-a				pg/ml	(Azeredo et al. 2001)				17	0.726026	0.607331
TNF-b				pg/ml	(Becquart et al. 2010)				30	204.545	52.2727
TNF-a				pg/ml	(Priyadarshini et al. 2010)				45	3.5	0.666667
TNF-a				pg/ml	(Guerrero et al. 2013)				12	2.1	0.6
TNF-a				pg/ml	(Limonta et al. 2014)				10	22.0455	47.0314
TNF-a				pg/ml	(Soundravally et al. 2014)				30	6.2	1.8
TNF-a				pg/ml	(Michels et al. 2015)				14	3.30067	1.36178
TNF-a				pg/ml	(Senaratne, Carr, and Noordeen 2016)				15	20.72	25.98
TNF-a				pg/ml	(Zhao et al. 2016)				10	10.7723	2.92133
TNF-a				pg/ml	Sera	325	14.691	2.269				Random	0	99.774		10.244	19.137
TNF-a				pg/ml	Plasma				195	18.929	2.701	Random	0	99.892		13.635	24.222
TNF-a	520	-4.238	0.230767	pg/ml	Sera vs plasma										0.229599	-4.6903	-3.7857
sTNF-R1				pg/ml	(Pinto et al. 1999)	9	4512	96
sTNF-R1				pg/ml	(Arias et al. 2014)	10	1583	458.3
sTNF-R1				pg/ml	Sera	19	3050.91	1464.5				Random	0	99.743		180.551	5921.27
sTNF-R2				pg/ml	(Pinto et al. 1999)	9	1416	176
sTNF-R2				pg/ml	(Braga et al. 2001)	10	1574.74	511.42
sTNF-R2				pg/ml	(Arias et al. 2014)	10	2547	697.2
sTNF-R2				pg/ml	(Azeredo et al. 2001)				16	1448.79	467.448
sTNF-R2				pg/ml	Sera	29	1812.4	287.328				Random	0	91.94		1249.25	2375.55
sTNF-R2				pg/ml	Plasma				16	1448.79	467.448
sTNF-R2	45	363.607	128.466	pg/ml	Sera vs Plasma										0.507537	180.551	5921.27
MIF				pg/ml	(Chen et al. 2006)	17	800	100
MIF				pg/ml	(Becquart et al. 2010)				30	1395.35	0
MIF				pg/ml	(Zhao et al. 2016)				10	135.6
MIF				pg/ml	(Assunção-Miranda et al. 2010)				11	690.2	490
MIF	47	-595.349	24.2536	pg/ml	Sera vs Plasma										0.826217	180.551	5921.27
TGF-b				ng/ml	(Pandey et al. 2015)	70	35.7143	16.6667
sST2				pg/ml	(Houghton-Trivino et al. 2009)	7	589.286	504.854
sST2				pg/ml	(Arias et al. 2014)	10	22.08	5.16
sST2				pg/ml	(Guerrero et al. 2013)				24	150.7	168.6
sST2				pg/ml	Sera	17	273.599	281.777				Random	0.003	88.679		-278.674	825.873
sST2				pg/ml	Plasma				24	150.7	168.6
sST2	41	122.899	76.5173	pg/ml	Sera vs plasma										0.7082	180.551	5921.27
sE-selectin				ng/ml	(Khongphatthanayothin et al., 2006)	7	94.2177	18.015
sE-selectin				ng/ml	(Liu et al. 2016)	5	45	17.343
sE-selectin				ng/ml	Sera	12	69.738	24.6				Random	0	95.615		21.524	117.952
sL-selectin				ng/ml	(Liu et al. 2016)	11	748.252	259.992
sL-selectin				ng/ml	(Murgue, Cassar, and Deparis 2001)				8	964	71
sL-selectin	19	-215.748	82.3117	ng/ml	Sera vs Plasma										0.423414	180.551	5921.27
sP-selectin				ng/ml	(Liu et al. 2016)	11	623.864	265.604
sP-selectin				ng/ml	(Murgue, Cassar, and Deparis 2001)				8	36	12
sP-selectin	19	587.864	80.1949	ng/ml	Sera vs Plasma										0.0270321	180.551	5921.27
VEGF				pg/ml	(Seet et al. 2009)	31	365	190
VEGF				pg/ml	(Misra, Kalita, and Singh 2014)	14	61.25	5
VEGF				pg/ml	(van de Weg et al. 2014)	13	67	73.5
VEGF				pg/ml	(Thakur et al. 2016)	40	3.493	1.982
VEGF				pg/ml	(Becquart et al. 2010)				30	34.0909	45.4545
VEGF				pg/ml	(Furuta et al. 2012)				18	547.6	53.6
VEGF				pg/ml	Sera	98	99.397	22.774				Random	0	99.841		54.761	144.033
VEGF				pg/ml	Plasma				48	290.762	256.75	Random	0	99.913		-212.459	793.983
VEGF	146	-191.365	37.13	pg/ml	Sera vs Plasma										0.457832	180.551	5921.27
VEGFR1				pg/ml	(Seet et al. 2009)	31	219	208
VEGFR1				pg/ml	(Furuta et al. 2012)				18	257.9	47.6
VEGFR1	49	-38.9	39.0063	pg/ml	Sera vs Plasma										0.855342	180.551	5921.27
VEGFR2				pg/ml	(Seet et al. 2009)	31	6559	1569
VEGFR2				pg/ml	(Furuta et al. 2012)				18	17577.2	2253.5
VEGFR2				pg/ml	(van de Weg et al. 2014)				15	10796.3	3029.9
VEGFR2				pg/ml	Sera	31	6559	1569
VEGFR2				pg/ml	Plasma				33	14211.1	3390.36	Random	0	98.055		7566.09	20856.1
VEGFR2	64	-7652.08	654.012	pg/ml	Sera vs Plasma										0.0405305	180.551	5921.27
sVCAM-1				ng/ml	(Murgue, Cassar, and Deparis 2001)				8	453	172
sVCAM-1				ng/ml	(Zhao et al. 2016)				9	39.7	8.8
sVCAM-1				ng/ml	Plasma				17	241.887	206.602	Random	0	97.83		-163.045	646.819
ICAM-1				ng/ml	(Khongphatthanayothin et al., 2006)	25	392.698	111.885
ICAM-1				ng/ml	(Valero et al. 2008)	12	40.22	2.08
ICAM-1				ng/ml	(Zhao et al. 2016)				9	16.7	6.4
ICAM-1				ng/ml	Sera	37	215.74	176.249				Random	0	99.597		-129.701	561.181
ICAM-1				ng/ml	Plasma				9	16.7	6.4
ICAM-1	46	199.04	29.0536	ng/ml	Sera vs Plasma										0.25908	180.551	5921.27
IFN-a2				U/ml	(Kurane et al. 1993)	28	1.01811	0.166665
IFN-a2				pg/ml	(Becquart et al. 2010)				30	219.697	30.303
IFN-a2				pg/ml	(Michels et al. 2015)				20	20.6144	20.0071
IFN-a2				pg/ml	(Zhao et al. 2016)				10	74.4535
IFN-a2				pg/ml	Sera	28	1.01811	0.166665
IFN-a2				pg/ml	Plasma				60	120.123	99.55	Random	0	99.872		-74.991	315.238
IFN-a2	88	-119.105	12.8519	pg/ml	Sera vs Plasma										0.231528	180.551	5921.27
IFN-g				U/ml	(Kurane et al. 1991)	29	0.0854149	0.110741
IFN-g				pg/ml	(Braga et al. 2001)	9	42.9548	6.59241
IFN-g				pg/ml	(Hung et al. 2004)	6	4.1	5.8
IFN-g				pg/ml	(Chen et al. 2006)	17	3.1	1.6
IFN-g				pg/ml	(Pandey et al. 2015)	70	36.1111	8.33333
IFN-g				pg/ml	Feitosa et al. 2016	99	123.6	39.3
IFN-g				pg/ml	(Azeredo et al. 2001)				17	6.56511	0.403515
IFN-g				pg/ml	(Juffrie et al. 2001)				15	4.0625	3.48386
IFN-g				pg/ml	(Becquart et al. 2010)				30	140.909	95.4545
IFN-g				pg/ml	(Priyadarshini et al. 2010)				45	2	0
IFN-g				pg/ml	(Soundravally et al. 2014)				30	3.5	1.4
IFN-g				pg/ml	(Michels et al. 2015)				21	9.84632	13.4719
IFN-g				pg/ml	(Zhao et al. 2016)				10	10.9344	6.93144
IFN-g				pg/ml	Sera	230	33.854	5.373				Random	0	99.817		23.324	44.384
IFN-g				pg/ml	Plasma				168	6.969	1.299	Random	0	97.497		4.422	9.515
IFN-g	398	26.885	0.368187	pg/ml	Sera vs Plasma										1.15269e-06	180.551	5921.27
sTRAIL				pg/ml	(Arias et al. 2014)	10	51.71	8.02
sTRAIL				pg/ml	(Limonta et al. 2014)				10	302.632	72.0688
sTRAIL	20	-250.922	22.9308	pg/ml	Sera vs Plasma										0.0005395	180.551	5921.27
MMP-2				pg/ml	(van de Weg et al. 2014)	15	571816	115506
MMP-9				ng/ml	(Voraphani et al. 2010)	7	371.241	91.8588
MMP-9				ng/ml	(van de Weg et al. 2014)	13	114.3	57.9
MMP-9				ng/ml	Sera	20	240.904	128.437				Random	0	97.781		-10.828	492.635

## Sheet: 7- subgroup infection
Biomarkers	Total	Mean difference	Combined std	day	Study Name	primary			secondary			model	Q (p-value)	I^2	subgroup (p-value)	lower limit	upper limit
						n	es	se	n	es	se
MCP-1	51	-212.976	139.064	1-10	(Singla et al. 2016) DF	27	765.458	575.217	24	552.482	412.334				0.763472
MCP-1	43	-757.753	790.856	1-10	(Singla et al. 2016) DHF	12	1512.69	2573.4	31	754.938	1510.35				0.799535
MCP-1					Primary	39	781.731	109.488				Fixed	0.32	0		567.137	996.324
MCP-1					Secondary				55	570.272	80.381	Fixed	0.476	0		412.73	727.815
MCP-1	94	-472.397	272.089		Primary vs secondary							Random	0	94.971	0.119509	-1005.68	60.888
RANTES	21	-5.83977	13.6971	1-3	(Perez et al. 2004) DF	7	50.8848	29.8506	14	45.045	29.0592				0.888518
RANTES	21	8.82941	12.5904	4-5	(Perez et al. 2004) DF	8	35.8108	17.3545	13	44.6402	39.6399				0.83832
RANTES	20	-16.1219	12.6712	6	(Perez et al. 2004) DF	9	45.2244	23.5319	11	29.1025	33.005				0.690831
RANTES	44	-46.98	8.4725	5	(Rathakrishnan et al. 2012)	16	57.8827	33.8544	28	10.9027	2.05552
RANTES					Primary	40	44.782	3.938				Fixed	0.185	37.805		37.063	52.501
RANTES					Secondary				66	31.325	10.951	Random	0	90.572		9.862	52.788
RANTES	106	-15.085	14.517		Primary vs secondary							Random	0	99.353	0.24754	-43.537	13.367
Eotaxin	44	75.5091	12.6169	1-4	(Rathakrishnan et al. 2012)	16	183.033	34.4975	28	258.542	48.7293				0.205974
CXCL10	44	30106.6	3054.55	1-4	(Rathakrishnan et al. 2012)	16	38685.6	7291.37	28	68792.3	12969.6
CXCL10	46	1172.48	874.803	1-10	(Singla et al. 2016) DF	27	6746.35	2554.21	19	7918.83	3154.26				0.772675
CXCL10	27	-307.642	1631.28	1-10	(Singla et al. 2016) DHF	9	7434.32	4267.64	18	7126.67	3387.32				0.954973
CXCL10					Primary	52	17546.7	8294.29				Random	0	99.304		1290.19	33803.2
CXCL10					Secondary				65	27705.4	10087.2	Random	0	99.664		7934.89	47475.8
CXCL10	117	10317.2	7078.75		Primary vs secondary							Random	0	99.947	0.436636	-3556.91	24191.3
IL-2	167	-191.073	219.011	1-20	(Kurane et al. 1991)	4	350.877	425.596	163	159.804	661.298				0.808031
IL-2r	150	-505.419	185.129	1-20	(Kurane et al. 1991)	5	2061.9	377.439	145	1556.49	915.536				0.609788
IL-6	27	0.47	1.1229	1-5	(Restrepo et al. 2008)	11	5.4	2.97	16	5.87	2.71
IL-6	36	0	0.33541	NA	(Levy et al. 2010) DF	20	3.16667	1	16	3.16667	1				1
IL-6	34	2.2284	0.442519	NA	(Levy et al. 2010) DHF	18	3.38272	0.767011	16	5.61111	1.61562				0.212766
IL-6	122.14	0.821429	0.115019	2-15	(Priyadarshini et al. 2010)	98.58	0.642857	0.321429	23.56	1.46429	0.535714
IL-6	30	0	0.819927	NA	(Arias et al. 2014)	8	6.26087	1.91304	22	6.26087	2.17391
IL-6	36	0.552922	2.65351	1-10	(Singla et al. 2016) DF	21	4.68683	5.11377	15	5.23975	9.32404				0.958533
IL-6	40	-143.587	87.7294	1-10	(Singla et al. 2016) SD	12	161.359	303.338	28	17.7712	28.3185				0.63742
IL-6					Primary	188.58	3.84	0.894				Random	0	98.674		2.087	5.593
IL-6					Secondary				136.56	4.887	0.96	Random	0	97.617		3.006	6.768
IL-6	325.14	0.611	0.329		Primary vs secondary							Random	0	99.262	0.424792	-0.034	1.256
IL-7	47	-3.94946	2.18459	1-10	(Singla et al. 2016) DF	27	10.1596	8.19795	20	6.21012	6.75769				0.710084
IL-7	28	1.06798	1.21929	1-10	(Singla et al. 2016) SD	10	3.22873	2.98126	18	4.29671	3.28054				0.809612
IL-7					Primary	37	6.586	3.498				Random	0	93.081		-0.27	13.443
IL-7					Secondary				38	4.694	0.692	Fixed	0.266	19.197		3.337	6.051
IL-7	75	-1.395	2.5		Primary vs secondary							Random	0	99.382	0.595698	-6.295	3.505
IL-8	122.14	0.321429	0.0643091	2-15	(Priyadarshini et al. 2010)	99	1.60714	0.464286	24	1.92857	0.214286
IL-8	51	108.21	68.2889	D -3 (2)	(Pandey et al. 2015)	25	256.31	234.6	26	364.52	253
IL-8	71	219.74	47.5946	D -2 (3)	(Pandey et al. 2015)	31	236.12	172.3	40	455.86	228.7
IL-8	62	169.71	41.4284	D -1 (4)	(Pandey et al. 2015)	31	207.24	131.8	31	376.95	189.3
IL-8	27	11.4	52.2044	D 0 (5)	(Pandey et al. 2015)	13	254.06	175.2	14	265.46	71.4
IL-8	50	6.28791	3.9232	1-10	(Singla et al. 2016) DF	28	12.8125	11.1973	22	19.1004	15.4952				0.742225
IL-8	44	-50.6894	29.8939	1-10	(Singla et al. 2016) SD	12	92.7231	99.476	32	42.0336	46.9974				0.644991
IL-8					Primary	239	89.34	11.755				Random	0	97.361		66.3	112.379
IL-8					Secondary				189	182.575	21.191	Random	0	98.955		141.042	224.108
IL-8	427.14	65.104	8.121		Primary vs secondary							Random	0	99.795	0.000119359	49.187	81.021
IL-10	20	28.3818	12.3649	1-3	(Perez et al. 2004) DF	7	5.29412	6.80084	13	33.6759	43.6082				0.520183
IL-10	19	34.146	23.9555	4-5	(Perez et al. 2004) DF	8	19.2929	43.0884	11	53.4389	61.3163				0.648654
IL-10	23	48.6031	12.9667	6	(Perez et al. 2004) DF	10	1.82353	1.55509	13	50.4266	46.7185				0.29845
IL-10	72	19.3103	1.3428	2-7	(Chen et al. 2007)	34	16.5517	3.7931	38	35.8621	7.24138
IL-10	51	-36.49	46.0216	D -3 (2)	(Pandey et al. 2015)	25	124.11	218.4	26	87.62	73.9
IL-10	71	115.3	62.7174	D -2 (3)	(Pandey et al. 2015)	31	196.67	253.5	40	311.97	272.8
IL-10	62	-75.22	63.159	D -1 (4)	(Pandey et al. 2015)	31	290.45	258.6	31	215.23	238.3
IL-10	27	-215.2	113.897	D 0 (5)	(Pandey et al. 2015)	13	332.68	394.3	14	117.48	119.1
IL-10	51	192.156	72.6006	1-10	(Singla et al. 2016) DF	27	59.966	89.1284	24	252.122	345.6				0.590307
IL-10	37	-101.15	113.123	1-10	(Singla et al. 2016) SD	11	297.621	334.051	26	196.471	262.597				0.811841
IL-10					Primary	197	23.842	5.773				Random	0	97.811		12.527	35.157
IL-10					Secondary				236	105.977	16.75	Random	0	90.842		73.148	138.806
IL-10	433	7.987	11.772		Primary vs secondary							Random	0	99.062	3.55288e-06	-15.085	31.06
IL-12	30	-5.12821	12.4142	NA	(Arias et al. 2014)	8	87.1795	19.2308	22	82.0513	48.7179
IL-12	44	-2.6051	1.14678	1-10	(Singla et al. 2016) DF	27	6.45784	4.13723	17	3.85274	3.40286				0.626748
IL-12	27	0.00177448	0.555307	1-10	(Singla et al. 2016) SD	12	2.82801	1.04575	15	2.82979	1.80513				0.999321
IL-12	21	71.5873	38.3227	1-3	(Perez et al. 2004) DF	7	98.4127	64.3513	14	170	110.809				0.576389
IL-12	21	46.1338	31.1882	4-5	(Perez et al. 2004) DF	8	84.6354	49.2621	13	130.769	93.2826				0.661877
IL-12	21	-56.202	50.2208	6	(Perez et al. 2004) DF	10	138.222	146.801	11	82.0202	63.5451				0.725331
IL-12					Primary	72	32.223	5.004				Random	0	97.701		22.415	42.031
IL-12					Secondary				92	25.464	4.657	Random	0	96.216		16.337	34.591
IL-12	164	1.166	1.503		Primary vs secondary							Random	0	98.424	0.322776	-1.781	4.112
IL-17	90	2.48	0.7298	NA	(Jain et al. 2013) DF	49	2.23	2	41	4.71	4.3				0.601012
IL-17	121	6.91	0.804791	NA	(Jain et al. 2013) DHF	51	1.01	1.5	70	7.92	6.5				0.300271
IL-17	30	2.75862	8.8221	NA	(Arias et al. 2014)	8	44.1379	19.3103	22	46.8966	26.2069
IL-17					Primary	108	2.888	1.228				Random	0	96.043		0.482	5.294
IL-17					Secondary				133	14.528	3.555	Random	0	96.807		7.56	21.496
IL-17	241	4.162	1.86		Primary vs secondary							Random	0	99.889	0.00196929	0.516	7.808
IL-21	240	51.2	24.4967	1-7	(Vivanco-Cid et al. 2014)	91	108.8	152.2	149	160	226.9
IL-21	120	-94.4	44.71	8-10	(Vivanco-Cid et al. 2014)	31	230.5	225.6	89	136.1	178.3
IL-21					Primary	122	163.951	60.583				Random	0.005	87.196		45.211	282.69
IL-21					Secondary				238	148.249	13.253	Fixed	0.367	0		122.274	174.223
IL-21	360	-21.551	72.8		Primary vs secondary							Random	0	99.91	0.800118	-164.237	121.134
TNF-a	27	2.88	1.70386	1-5	(Restrepo et al. 2008)	11	3.53	2.8	16	6.41	5.92
TNF-a	36	0.9375	2.18862	NA	(Levy et al. 2010) DF	20	86.25	7.5	16	87.1875	5.625				0.920344
TNF-a	34	5.55339	3.28871	NA	(Levy et al. 2010) DHF	18	92.7083	5.39459	16	98.2617	12.1318				0.675753
TNF-a	122.14	0.142857	0.0374863	2-15	(Priyadarshini et al. 2010)	98.58	0.25	0.0714286	23.56	0.392857	0.178571
TNF-a	30	-5.51724	9.03637	NA	(Arias et al. 2014)	8	51.0345	22.069	22	45.5172	21.3793
TNF-a					Primary	155.58	46.711	18.304				Random	0	99.95		10.837	82.585
TNF-a					Secondary				93.56	47.523	21.098	Random	0	99.92		6.171	88.875
TNF-a	249.14	1.485	1.249		Primary vs secondary							Random	0	95.954	0.976808	-0.962	3.933
sTNF-R1	30	769.231	508.578	NA	(Arias et al. 2014)	8	2769.23	871.795	22	3538.46	1897.44				0.712588
sTNF-R2	30	3793.1	1854.04	NA	(Arias et al. 2014)	8	8103.45	3448.28	22	11896.6	6551.72				0.608426
TGF-b	51	20.94	9.85176	D -3 (2)	(Pandey et al. 2015)	25	31.48	28.6	26	52.42	40.9
TGF-b	71	5.47	10.7509	D -2 (3)	(Pandey et al. 2015)	31	46.35	44	40	51.82	46.1
TGF-b	62	19.19	12.6257	D -1 (4)	(Pandey et al. 2015)	31	58.08	43.4	31	77.27	55.3
TGF-b	27	25.27	12.5062	D 0 (5)	(Pandey et al. 2015)	13	96.44	40.1	14	121.71	21.4
TGF-b					Primary	100	56.825	12.157				Random	0	89.644		32.999	80.652
TGF-b					Secondary				111	75.995	19.275	Random	0	96.2		38.217	113.773
TGF-b	211	17.624	4.52		Primary vs secondary							Random	0	96.938	0.400229	8.765	26.482
sST2	30	86.9565	21.9884	NA	(Arias et al. 2014)	8	47.8261	15.2174	22	134.783	100				0.389972
sP-Selectin	12	-28	25.4198	1	(Murgue, Cassar, and Deparis 2001)	6	86	54	6	58	31
sP-Selectin	26	-19	15.4372	2	(Murgue, Cassar, and Deparis 2001)	13	65	53	13	46	17
sP-Selectin	37	-20	12.3217	3	(Murgue, Cassar, and Deparis 2001)	16	61	47	21	41	17
sP-Selectin	45	-24	9.14496	4	(Murgue, Cassar, and Deparis 2001)	17	57	35	28	33	18
sP-Selectin	43	-23	9.5678	5	(Murgue, Cassar, and Deparis 2001)	15	50	36	28	27	12
sP-Selectin	31	-35	16.1755	6	(Murgue, Cassar, and Deparis 2001)	8	63	45	23	28	14
sP-Selectin	18	-46	21.4651	7	(Murgue, Cassar, and Deparis 2001)	6	77	52	12	31	11
sP-Selectin	15	-32	23.2178	8	(Murgue, Cassar, and Deparis 2001)	4	78	45	11	46	19
sP-Selectin	2	-188	0	9	(Murgue, Cassar, and Deparis 2001)	1	263		1	75
sP-Selectin					Primary	86	60.245	4.587				Fixed	0.767	0		51.254	69.235
sP-Selectin					Secondary				143	35.999	2.863	Random	0	77.814		30.387	41.612
sP-Selectin	229	-27.038	2.295		Primary vs secondary							Random	0	83.415	7.32369e-06	-31.536	-22.539
sL-Selectin	12	-203	252.417	1	(Murgue, Cassar, and Deparis 2001)	6	1610	483	6	1407	386
sL-Selectin	26	-621	163.441	2	(Murgue, Cassar, and Deparis 2001)	13	1869	465	13	1248	362
sL-Selectin	37	-513	149.697	3	(Murgue, Cassar, and Deparis 2001)	16	1799	495	21	1286	386
sL-Selectin	45	-415	147.21	4	(Murgue, Cassar, and Deparis 2001)	17	1741	532	28	1326	375
sL-Selectin	43	-362	121.678	5	(Murgue, Cassar, and Deparis 2001)	15	1730	402	28	1368	336
sL-Selectin	31	-131	122.707	6	(Murgue, Cassar, and Deparis 2001)	8	1530	302	23	1399	290
sL-Selectin	18	-274	261.435	7	(Murgue, Cassar, and Deparis 2001)	6	1623	587	12	1349	362
sL-Selectin	15	-410	95.5058	8	(Murgue, Cassar, and Deparis 2001)	4	1764	158	11	1354	178
sL-Selectin					Primary	85	1723.82	41.908				Fixed	0.573	0		1641.68	1805.95
sL-Selectin					Secondary				142	1348.29	26.354	Fixed	0.92	0		1296.64	1399.94
sL-Selectin	227	-370.422	54.769		Primary vs secondary							Random	0	96.917	3.30846e-14	-477.768	-263.077
sVCAM-1	12	35	104.183	1	(Murgue, Cassar, and Deparis 2001)	6	793	145	6	828	210
sVCAM-1	26	40	122.453	2	(Murgue, Cassar, and Deparis 2001)	13	819	301	13	859	323
sVCAM-1	37	-131	175.946	3	(Murgue, Cassar, and Deparis 2001)	16	1003	606	21	872	410
sVCAM-1	45	-32	230.613	4	(Murgue, Cassar, and Deparis 2001)	17	1230	844	28	1198	562
sVCAM-1	43	-65	250.433	5	(Murgue, Cassar, and Deparis 2001)	15	1486	877	28	1421	566
sVCAM-1	31	29	316.947	6	(Murgue, Cassar, and Deparis 2001)	8	1544	848	23	1573	493
sVCAM-1	18	166	337.367	7	(Murgue, Cassar, and Deparis 2001)	6	1748	780	12	1914	386
sVCAM-1	15	-29	316.36	8	(Murgue, Cassar, and Deparis 2001)	4	1719	571	11	1690	452
sVCAM-1	2	-166	0	9	(Murgue, Cassar, and Deparis 2001)	1	1416		1	1250
sVCAM-1	168	149.7	125.45	1-13	(Koraka et al. 2004)	41	720	688	127	869.7	729.7
sVCAM-1	72	976.19	42.0923	2-7	(Chen et al. 2007)	34	2119.05	166.667	38	3095.24	190.476
sVCAM-1					Primary	161	1306.83	265.806				Random	0	98.66		785.863	1827.81
sVCAM-1					Secondary				308	1432.33	381.331	Random	0	99.581		684.93	2179.72
sVCAM-1	469	114.345	189.252		Primary vs secondary							Random	0	99.905	0.787182	-256.582	485.271
ICAM-1	44	72315.4	5813.12	1-4	(Rathakrishnan et al. 2012)	16	64944.6	16817.3	28	137260	21242.6				0.00760591
IFN-a	31	-7.05381	6.29198	1-20	(Kurane et al. 1993) DF	13	12.0621	21.7652	18	5.00826	7.5286
IFN-a	112	14.9463	3.94636	1-20	(Kurane et al. 1993) DHF	8	2.19026	3.03999	104	17.1365	38.7238
IFN-a	72	-24.2857	3.28635	2-7	(Chen et al. 2007)	34	41.9048	18.0952	38	17.619	6.66667
IFN-a	44	0.2	0.816441	1-5	(Oliveira et al. 2016) DF	13	1.6	2.5	31	1.8	2.4				0.953979
IFN-a	27	-1.2	1.19233	1-5	(Oliveira et al. 2016) DHF	10	4	3.2	17	2.8	2.6				0.771019
IFN-a	46	-65.5827	16.206	1-10	(Singla et al. 2016) DF	27	79.4042	81.6271	19	13.8215	17.3572				0.431942
IFN-a	42	-20.413	17.0407	1-10	(Singla et al. 2016) SD	12	39.0217	57.0044	30	18.6087	24.2454				0.741756
IFN-a					Primary	117	15.928	3.811				Random	0	96.88		8.459	23.397
IFN-a					Secondary				257	10.182	2.558	Random	0	97.214		5.169	15.196
IFN-a	374	-14.428	4.208		Primary vs secondary							Random	0	99.906	0.210613	-22.675	-6.182
IFN-b	44	-10	18.614	1-5	(Oliveira et al. 2016) DF	13	59.2	60.3	31	49.2	45.5				0.894684
IFN-b	33	-18.1	19.4961	1-5	(Oliveira et al. 2016) DHF	11	61.2	59.5	22	43.1	35.8				0.794357
IFN-b					Primary	24	60.13	12.233				Fixed	0.935	0		36.154	84.106
IFN-b					Secondary				53	45.942	5.578	Fixed	0.585	0		35.009	56.875
IFN-b	77	-13.285	2.162		Primary vs secondary							Fixed	0.066	70.454	0.291295	-17.523	-9.048
IFN-g	190	-3.84657	1.75855	1-20	(Kurane et al. 1991)	23	4.70366	8.40072	167	0.857088	2.00818
IFN-g	72	-30.6667	3.00304	2-7	(Chen et al. 2007)	34	69.3333	13.3333	38	38.6667	12
IFN-g	27	-9.6	11.7741	1-5	(Restrepo et al. 2008)	11	23.95	28.88	16	14.35	31.7
IFN-g	122.14	2.28571	0.23644	2-15	Priyadarshini et al. 2010	98.58	1.07143	0.214286	23.56	3.35714	1.14286
IFN-g	44	-275.97	46.585	5	(Rathakrishnan et al. 2012)	16	344.759	186.166	28	68.7891	10.6459
IFN-g	51	29.87	16.6252	D -3 (2)	(Pandey et al. 2015)	25	38.14	40.2	26	68.01	74.2
IFN-g	71	27.03	21.6594	D -2 (3)	(Pandey et al. 2015)	31	77.92	80.4	40	104.95	102.1
IFN-g	62	10.39	17.6308	D -1 (4)	(Pandey et al. 2015)	31	55.23	55.6	31	65.62	80.9
IFN-g	27	8.89	7.41634	D 0 (5)	(Pandey et al. 2015)	13	29.95	17.7	14	38.84	20.8
IFN-g	47	-2.60117	5.76809	1-10	(Singla et al. 2016) DF	27	16.8947	20.0667	20	14.2935	19.1609				0.925307
IFN-g	38	-8.51792	14.0903	1-10	(Singla et al. 2016) DHF	12	18.5943	46.2876	26	10.0764	22.7981				0.868878
IFN-g					Primary	321.58	41.525	9.152				Random	0	99.084		23.586	59.463
IFN-g					Secondary				429.56	28.676	2.897	Random	0	99.409		22.999	34.354
IFN-g	751.14	-15.484	2.999		Primary vs secondary							Random	0	99.921	0.180734	-21.362	-9.606
sTRAIL	30	-3.44828	12.5411	NA	(Arias et al. 2014)	8	113.793	34.4828	22	110.345	13.7931				0.926025
sCD4	81	8.91125	5.69272	1-20	(Kurane et al. 1991)	5	23.1373	12.1062	76	32.0485	15.3375				0.648347
sCD8	134	-1023.68	458.745	1-20	(Kurane et al. 1991)	7	1927.44	1202.12	127	903.762	713.08				0.463927
sCD40l	50	-1727.68	1214.5	1-10	(Singla et al. 2016) DF	27	4538.13	4846.11	23	2810.45	3730.9				0.777568
sCD40l	46	-1288.21	1275.38	1-10	(Singla et al. 2016) DHF	12	2726.96	4213.63	34	1438.76	2235.95				0.787116
sCD40l					Primary	39	3867.57	740.117				Fixed	0.237	28.376		2416.97	5318.17
sCD40l					Secondary				57	1706.94	343.954	Fixed	0.114	60.02		1032.8	2381.08
sCD40l	96	-1527.81	126.819		Primary vs secondary							Fixed	0.084	66.421	0.00811153	-1776.37	-1279.25

## Sheet: 8- subgroup serotypes
Biomarkers	Study name	DENV-1			DENV-2			DENV-3			DENV-4			model	Q (p-value)	I^2	ranking	sequence	subgroup analysis		p-value (anova)	lower limit	upper limit
		n	mean	std	n	mean	std	n	mean	std	n	mean	std
MCP-1	(Sierra et al. 2010)	3	96.33	91.08	3	112.88	49.73	3	126.37	4.43
MCP-1	(Yohan et al. 2014)	2	1000	114.7	2	1385.2	61.5	2	1578	181	2	1385.2	93.3
MCP-1	DENV-1	5	546.041	451.845										Random	0	98.856	4	4, 3, 2, 1	1 vs 2	0.461671	1.62919e-14	-339.559	1431.64
MCP-1	DENV-2				5	748.63	636.15							Random	0	99.832	3		2 vs 3	0.919177		-498.2	1995.46
MCP-1	DENV-3							5	846.56	725.778				Random	0	99.222	2		3 vs 4	0.795147		-575.939	2269.06
MCP-1	DENV-4										2	1385.2	93.3				1		1 vs 4	0.0689398		1202.33	1568.07
MIP-1a	(Sierra et al. 2010)	3	152.17	59.55	3	104.85	98.96	3	160.3	70.33
MIP-1a	(Yohan et al. 2014)	2	3	0.2	2	3.4	0.4	2	2.7	1.2	2	1.6	0
MIP-1b	(Yohan et al. 2014)	2	5.3	0	2	5.4	1.3	2	12.2	4.7	2	4.9	0.4
MIP-1	DENV-1	7	73.632	74.494										Random	0	94.681	1	1, 3, 4, 2	1 vs 2	0.414645	3.9189e-05	-72.374	219.638
MIP-1	DENV-2				7	4.317	1.212							Random	0.024	73.215	4		2 vs 3	0.328916		1.941	6.694
MIP-1	DENV-3							7	12.531	7.806				Random	0	91.163	2		3 vs 4	0.647823		-2.769	27.831
MIP-1	DENV-4										4	4.9	0.4				3		1 vs 4	0.352188		4.116	5.684
IL-1a	(Yohan et al. 2014)	2	2.1	0.2	2	2.2	0.2	2	3.2	0.5	2	1.6	0.5				3	3, 2, 1, 4	1 vs 2	0.0633178	0.00505275
																	2		2 vs 3	0.723674
																	1		3 vs 4	0.35316
																	4		1 vs 4	0.0236516
IL-1b	(Valero et al. 2014)	30	77.5967	16.8468	30	205.8	19.2461	30	74.7267	9.53593	30	75.1233	11.2314				2	2, 1, 4, 3	1 vs 2	5.37885e-07	1.59015e-71
																	1		2 vs 3	0.902776
																	4		3 vs 4	0.978521
																	3		1 vs 4	1.04478e-09
IL-4	(Yohan et al. 2014)	2	11.4	3.4	2	6.8	1.8	2	7.1	5.6	2	3.5	0.6				1	1, 3, 2, 4	1 vs 2	0.511596	0.0950153
																	3		2 vs 3	0.959324
																	2		3 vs 4	0.0819903
																	4		1 vs 4	0.0221274
IL-6	(Levy et al. 2010)				6	3.6	0.2	4	4.2	0.2	4	7.7	0.3
IL-6	(Arias et al., 2014)	5	4.5	0.6	8	4.3	1	5	5.5	1.3	6	7.6	1.2
IL-6	(Valero et al. 2014)	30	272.4	42.4009	30	257.2	33.1066	30	263.233	57.1057	30	389.667	76.5208
IL-6	(Yohan et al. 2014)	2	32.3	0	2	29	1.3	2	43.8	4	2	25.4	0
IL-6	(de la Cruz Hernández et al. 2016) DF	60	50.3	130.2	41	32.2	17.7
IL-6	(de la Cruz Hernández et al. 2016) DHF	56	26.2	5.3	14	35.6	12.2
IL-6	Feitosa et al. 2016	19	11.9	7	8	15.6	12.7	53	9.6	5.4
IL-6	DENV-1	172	70.093	10.288										Random	0	99.801	1	1, 4, 3, 2	1 vs 2	0.525468	2.8273e-145	49.929	90.257
IL-6	DENV-2				109	48.958	4.795							Random	0	99.78	3		2 vs 3	0.0959581		39.56	58.356
IL-6	DENV-3							94	41.117	4.568				Random	0	99.539	4		3 vs 4	0.236422		32.164	50.069
IL-6	DENV-4										42	62.374	6.477	Random	0	99.733	2		1 vs 4	0.0100487		49.679	75.068
IL-7	(Yohan et al. 2014)	2	4.3	0.2	2	5.1	0.5	2	4.8	0.9	2	4.2	0.2				3	2, 3, 1, 4	1 vs 2	0.770756	0.174608
																	1		2 vs 3	0.587594
																	2		3 vs 4	0.723674
																	4		1 vs 4	0.0946707
IL-8	(Yohan et al. 2014)	2	1684.3	152.9	2	3027.8	274.9	2	3602.5	501.5	2	2600.7	175.1
IL-8	(Pandey et al. 2015) D -3(2)	2	288.137	171.189	9	459.326	244.068	3	135.593	159.323
IL-8	(Pandey et al. 2015) D -2(3)	2	456.814	325	16	427.271	249.997	5	336.362	434.088
IL-8	(Pandey et al. 2015) D -1(4)	7	209.918	119.007	14	408.265	218.183	4	497.52	203.308
IL-8	(Pandey et al. 2015) D 0(5)	2	269.159	160.75	3	364.488	117.756	2	201.872	132.709
IL-8	(de la Cruz Hernández et al. 2016) DF	60	69.2	179.3	41	108.8	329.4
IL-8	(de la Cruz Hernández et al. 2016) DHF	56	33.4	31.1	14	29.1	18.3
IL-8	Feitosa et al. 2016	19	61.3	33.5	8	41.9	21.3	53	47.9	31
IL-8	DENV-1	150	260.143	41.121										Random	0	97.386	4	4, 3, 2, 1	1 vs 2	1.55431e-15	1.05758e-126	179.548	340.738
IL-8	DENV-2				107	361.18	47.155							Random	0	98.112	3		2 vs 3	0.186144		268.758	453.602
IL-8	DENV-3							69	605.427	178.626				Random	0	96.021	2		3 vs 4	0.106336		255.327	955.527
																	1		1 vs 4	0
IL-10	(Tsai et al., 2014)	3	33.7	1.1	3	33.7	1.9	3	31.1	1.3	3	28.9	3.7
IL-10	(Pandey et al. 2015) D -3(2)	2	25.4255	25.4224	9	181.357	222.034	3	30.5093	20.3385
IL-10	(Pandey et al. 2015) D -2(3)	2	79.5479	56.8138	16	243.18	220.454	5	36.3636	38.6359
IL-10	(Pandey et al. 2015) D -1(4)	7	234.71	280.993	14	211.57	160.33	4	89.2546	62.81
IL-10	(Pandey et al. 2015) D 0(5)	2	132.713	57.9437	3	87.85	69.1594	2	302.806	291.587
IL-10	Feitosa et al. 2016	19	101.5	71.2	8	96.2	70.2	53	99	57.7
IL-10	DENV-1	35	71.498	19.611										Random	0	82.223	2	2, 1, 3, 4	1 vs 2	0.145234	0.000210941	33.06	109.935
IL-10	DENV-2				53	130.712	35.61							Random	0	88.563	1		2 vs 3	0.57925		60.917	200.506
IL-10	DENV-3							70	56.866	17.657				Fixed	0	93.583	3		3 vs 4	0.121099		22.259	91.472
																	4		1 vs 4	0.00445825
IL-12	(Arias et al., 2014)	5	109.1	27.3	8	65.2	12.1	5	112.1	24.2	6	59.1	18.2
IL-12	(Yohan et al. 2014)	2	1.2	0.3	2	1.9	0	2	1.2	0	2	1.9	0.1
IL-12	(de la Cruz Hernández et al. 2016) DF	60	26.3	5.2	41	26.8	3.9
IL-12	(de la Cruz Hernández et al. 2016) DHF	56	25.7	4	14	31.6	7.8
IL-12	DENV-1	123	34.305	8.976										Random	0	99.895	3	3, 2, 1, 4	1 vs 2	0.00457859	6.94547e-87	16.713	51.896
IL-12	DENV-2				65	40.412	7.325							Random	0	97.574	2		2 vs 3	0.598108		26.056	54.768
IL-12	DENV-3							7	112.1	24.2							1		3 vs 4	0.886236		64.668	159.532
IL-12	DENV-4										8	30.017	28.596	Random	0	98.313	4		1 vs 4	0.0284428		-26.03	86.064
IL-13	(Yohan et al. 2014)	2	1	0.2	2	2.3	0.2	2	2.7	0.2	2	1.9	0.4				4	3, 2, 4, 1	1 vs 2	0.157299	0.000341473
																	2		2 vs 3	0.371093
																	1		3 vs 4	0.0441713
																	3		1 vs 4	1.85057e-09
IL-15	(Yohan et al. 2014)	2	21.4	0.9	2	28.4	0	2	25.4	1.7	2	27.2	2.5				4	2, 4, 3, 1	1 vs 2	0.631227	0.00289324
																	1		2 vs 3	0.551585
																	3		3 vs 4	0.0375713
																	2		1 vs 4	7.32747e-15
IL-17	(Duran et al. 2013)	4	58.5	9.2	5	55.4	10	15	46.9	3.8	7	75.4	10.8
IL-17	(Jain et al. 2013)	13	3.62	2.9	42	6.44	7.1	14	3.51	2.5
IL-17	(Arias et al., 2014)	5	47.6	15.9	8	56.1	15.9	5	56.1	20.7	6	74.4	26.8
IL-17	DENV-1	22	36.317	21.173										Random	0	98.846	3	4, 2, 1, 3	1 vs 2	0.0742876	2.77416e-52	-5.181	77.815
IL-17	DENV-2				55	39.071	19.922							Random	0	98.892	2		2 vs 3	0.924529		0.025	78.117
IL-17	DENV-3							34	34.911	17.964				Random	0	99.852	4		3 vs 4	0.959616		-0.297	70.119
IL-17	DENV-4										13	75.278	3.825	Fixed	0.932	0	1		1 vs 4	0.0279608		67.782	82.774
TNF-a	(Levy et al. 2010)				6	92.9	5	4	92.9	1.4	4	93.6	2.9
TNF-a	(Arias et al., 2014)	5	55.6	13.3	8	51.9	25.2	5	53.3	4.4	6	50.4	26.7
TNF-a	(Valero et al. 2014)	30	108.577	40.9606	30	216.6	34.5945	30	111.217	34.985	30	110.2	36.1981
TNF-a	(Yohan et al. 2014)	2	1.1	0.2	2	1.2	0.2	2	1.6	0.8	2	1	0.1
TNF-a	(de la Cruz Hernández et al. 2016) DF	60	3.2	2.6	41	3.5	2.4
TNF-a	(de la Cruz Hernández et al. 2016) DHF	56	2.9	1.8	14	5.6	3.3
TNF-a	Feitosa et al. 2016	19	13.2	2.1	8	13.6	1.2	53	15.2	3.5
TNF-a	DENV-1	172	14.842	2.066										Random	0	99.431	4	4, 3, 2, 1	1 vs 2	0.810021	1.22913e-201	10.794	18.891
TNF-a	DENV-2				109	50.164	5.022							Random	0	99.847	3		2 vs 3	0.823478		40.321	60.007
TNF-a	DENV-3							94	54.595	19.218				Random	0	99.966	2		3 vs 4	7.79325e-11		16.929	92.262
TNF-a	DENV-4										42	63.77	32.974	Random	0	99.931	1		1 vs 4	0.138625		-0.858	128.398
TNF-b	(Yohan et al. 2014)	2	1	0.6	2	1	0.6	2	1	0.8	2	1.4	0.4
TNF-b	Feitosa et al. 2016	19	53	12.5	8	50.6	14.5	53	43.7	5.1
TNF-b	DENV-1	21	26.923	26										Random	0	99.689	1	1, 2, 3, 4	1 vs 2	0.96923	9.89735e-24	-24.036	77.881
TNF-b	DENV-2				10	25.537	24.799							Random	0	98.924	2		2 vs 3	0.922366		-23.067	74.141
TNF-b	DENV-3							55	22.348	21.35				Random	0	99.956	3		3 vs 4	0.326593		-19.497	64.193
TNF-b																	4		1 vs 4	0.326328
sTNF R1	(Arias et al., 2014)	5	2685.7	800	8	5028.6	2514.3	5	2514.3	628.6	6	3200	800				3	2, 4, 1, 3	1 vs 2	0.488282	0.0187732
																	1		2 vs 3	0.649411
																	4		3 vs 4	0.866217
																	2		1 vs 4	0.331977
sTNF R2	(Arias et al., 2014)	5	5000	833.3	8	15000	6875	5	7291.7	1250	6	14583.3	5833.3				4	2, 4, 3, 1	1 vs 2	0.963138	0.00189591
																	1		2 vs 3	0.221614
																	3		3 vs 4	0.127143
																	2		1 vs 4	0.148745
TGF-b	(Pandey et al. 2015) D -3(2)	2	111.866	27.118	9	28.8137	42.3727	3	16.9503	6.7795
TGF-b	(Pandey et al. 2015) D -2(3)	2	72.7273	68.1828	16	31.8192	36.3636	5	15.9096	11.3651
TGF-b	(Pandey et al. 2015) D -1(4)	7	64.4624	44.6273	14	59.502	57.8529	4	41.3226	51.2401
TGF-b	(Pandey et al. 2015) D 0(5)	2	110.281	11.2157	3	127.103	20.5626	2	74.7689	84.1091
TGF-b	DENV-1	13	102.651	6.65										Fixed	0.083	55.046	1	1, 2, 3	1 vs 2	0.103528	0.00183327	89.619	115.684
TGF-b	DENV-2				42	61.831	24.176							Random	0	93.519	2		2 vs 3	0.0664902		14.448	109.215
TGF-b	DENV-3							14	17.106	3.084				Fixed	0.595	0	3		1 vs 3	0		11.062	23.15
sST2	(Arias et al., 2014)	5	50	12.5	8	215.6	78.1	5	56.3	18.8	6	175	84.4				4	2, 4, 3, 1	1 vs 2	0.724036	5.38749e-05
																	1		2 vs 3	0.169829
																	3		3 vs 4	0.780204
																	2		1 vs 4	0.0362857
VEGF	(Azizan et al., 2009)	3	25948.5	432	3	29889.6	828.4	3	41560.4	131.2	3	20281.7	706.1				3	3, 2, 1, 4	1 vs 2	0	1.36166e-13
																	2		2 vs 3	2.46097e-05
																	1		3 vs 4	7.60103e-12
																	4		1 vs 4	0
sVCAM-1	(Murgue, Cassar, and Deparis 2001) D1	4	890	2191	12	811	173	2	926	91
sVCAM-1	(Murgue, Cassar, and Deparis 2001) D2	21	926	2518	26	839	307	6	1475	708
sVCAM-1	(Murgue, Cassar, and Deparis 2001) D3	20	1057	312	37	928	506	14	1815	829
sVCAM-1	(Murgue, Cassar, and Deparis 2001) D4	7	1034	307	45	1210	673	15	2292	1008
sVCAM-1	(Murgue, Cassar, and Deparis 2001) D5	7	1118	403	43	1444	680	17	2809	787
sVCAM-1	(Murgue, Cassar, and Deparis 2001) D6	4	1345	391	31	1559	589	13	2499	720
sVCAM-1	(Murgue, Cassar, and Deparis 2001) D7	4	2064	121	18	1859	522	6	2934	683
sVCAM-1	(Murgue, Cassar, and Deparis 2001) D8	7	1333	434	15	1697	464	2	3174	715
sVCAM-1	(Murgue, Cassar, and Deparis 2001) D9	1	1287		2	1353	11	2	2540	964
sVCAM-1	(Murgue, Cassar, and Deparis 2001) D10	5	1144	276	1	1024		2	1506	1020
sVCAM-1	DENV-1	80	1266.85	195.397										Random	0	95.007	3	3, 2, 1	1 vs 2	0.0104783	1.28875e-19	883.879	1649.82
sVCAM-1	DENV-2				230	1287.44	108.744							Random	0	96.689	2		2 vs 3	0.926641		1074.31	1500.57
sVCAM-1	DENV-3							79	2187.15	334.257				Random	0	95.494	1		1 vs 3	0.0174569		1532.02	2842.28
IFN-a	(Yohan et al. 2014)	2	17.2	2	2	29	5.5	2	26.6	1.2	2	19.6	0.9				4	2, 3, 4, 1	1 vs 2	0.669864	0.00375651
																	1		2 vs 3	3.06125e-06
																	2		3 vs 4	0.273821
																	3		1 vs 4	0.0437703
IFN-g	(Pandey et al. 2015) D -3(2)	2	49.1522	32.205	9	72.882	71.1863	3	32.205
IFN-g	(Pandey et al. 2015) D -2(3)	2	20.4541	20.4541	16	138.638	99.9981	5	59.0899
IFN-g	(Pandey et al. 2015) D -1(4)	7	69.4195	57.8529	14	90.907	97.5231	4	38.0145	23.1432
IFN-g	(Pandey et al. 2015) D 0(5)	2	22.4314	11.2157	3	22.4314	11.2157	2	46.7314	39.2498
IFN-g	(de la Cruz Hernández et al. 2016) DF	60	48.6	16.6	41	46.9	6.4
IFN-g	(de la Cruz Hernández et al. 2016) DHF	56	53.9	20.5	14	51.9	11.6
IFN-g	Feitosa et al. 2016	19	175.5	84.2	8	181.6	38.6	53	179.3	64.1
IFN-g	DENV-1	148	55.149	7.801										Random	0	90.281	3	3, 2, 1	1 vs 2	0.83652	1.99941e-49	39.858	70.439
IFN-g	DENV-2				105	77.524	10.043							Random	0	95.425	2		2 vs 3	0.0784958		57.841	97.207
IFN-g	DENV-3							14	89.121	55.297				Random	0	98.051	1		1 vs 3	0.542968		-19.259	197.5
sTRAIL	(Arias et al., 2014)	5	128.1	32.8	8	82.8	14.1	5	106.3	10.9	6	78.1	12.5				1	1, 3, 2, 4	1 vs 2	0.528224	0.000217372
																	3		2 vs 3	0.187302
																	2		3 vs 4	0.803029
																	4		1 vs 4	0.154315

## Sheet: 9- course of infections
Number of DF and DHF cases
No	Study name	Number of cases
		DF	SDI
1	(Kurane et al. 1993)	6	32
2	(Sharone Green et al. 1999)	20	23
3	(S Green et al. 1999)	20	20
4	(Kittigul et al. 2000)	4	18
5	(Murgue, Cassar, and Deparis 2001)	35	10
6	(Perez et al. 2004)	23	5
7	(Butthep et al. 2006)	22	64
8	(Khongphatthanayothin, Phumaphuti, Thongchaiprasit, & Poovorawan, 2006)	11	16
9	(Srikiatkhachorn et al. 2006)	22	23
10	(Dejnirattisai et al., 2008)	12	31
11	(Houghton-Trivino et al. 2009)	21	17
12	(Ubol et al. 2010)	15	15
13	(Chunhakan et al. 2015)	36	67
14	(Ferreira et al. 2015)	23	29
15	(Pandey et al. 2015)	31	40
16	(Eppy et al. 2016)	20	24
17	(Fernando et al. 2016)	25	15
18	(Kamaladasa et al. 2016)	11	25
19	(Kurane et al. 1991)	36	35
20	(Yadav et al. 1991)	8	16
21	(Agarwal et al. 1999)	10	21
22	(Braga et al. 2001)	16	15
23	(Mustafa et al. 2001)	24	26
24	(Libraty et al. 2002)	12	29
25	(Koraka et al., 2004)	40	58
26	(R.-F. Chen et al. 2005)	66	33
27	(Elzinandes L Azeredo et al. 2006)	31	19
28	(Chen et al. 2006)	12	20
29	(Lee et al. 2006)	4	40
30	(Chen et al. 2007)	168	82
31	(Wang et al. 2007)	44	25
32	(Restrepo et al. 2008)	18	9
33	(Valero et al., 2008)	17	15
34	(Levy et al. 2010)	36	34
35	(Priyadarshini et al. 2010)	79	32
36	(Voraphani et al. 2010)	15	8
37	(Furuta et al. 2012)	19	84
38	(Kumar et al. 2012)	44	18
39	(de-Oliveira-Pinto et al., 2012)	22	21
40	(Guerrero et al. 2013)	39	28
41	(Jain et al. 2013)	90	121
42	(Malavige et al. 2013)	219	58
43	(Arias et al. 2014)	22	8
44	(Limonta et al. 2014)	50	16
45	(Misra, Kalita, and Singh 2014)	12	9
46	(Soundravally et al. 2014)	27	54
47	(Vivanco-Cid et al. 2014)	103	49
48	(Conroy et al. 2015)	65	46
49	(Michels et al. 2015)	65	12
50	(Patra et al. 2015)	29	11
51	(de la Cruz Hernández et al. 2016)	51	38
52	(Oliveira et al. 2016)	44	33
53	(Senaratne, Carr, and Noordeen 2016)	24	43
54	(Singla et al. 2016)	26	29
55	(Thakur et al. 2016)	58	48
56	(Zhao et al. 2016)	19	11
	Total number of data with stated day	357	474
	total	2021	1728
Number of DF and DHF cases on different days of illness							Summary of number of DF and DHF cases on different days of illness
Days of illness	Study name	Number of cases		Total number of cases			Days of illness	Total number of DF cases	Percentage (%)	Total number of SDI cases	Percentage (%)
		DF	SDI	DF	SDI
							1	15	1.29088	1	0.0667557
1	(Kurane et al. 1993)	4	0				2	103	8.86403	87	5.80774
1	(Murgue, Cassar, and Deparis 2001)	11	1				3	188	16.179	200	13.3511
1				15	1		4	235	20.2238	308	20.5607
2	(Kurane et al. 1993)	4	3				4.5	11	0.946644	25	1.66889
2	(Sharone Green et al. 1999)	7	9				5	230	19.7935	338	22.5634
2	(S Green et al. 1999)	6	9				5.5	11	0.946644	25	1.66889
2	(Kittigul et al. 2000)	1	5				6	182	15.6627	263	17.5567
2	(Murgue, Cassar, and Deparis 2001)	24	2				6.5	11	0.946644	25	1.66889
2	(Butthep et al. 2006)	3	6				7	72	6.19621	116	7.74366
2	(Srikiatkhachorn et al. 2006)	22	23				8	39	3.35628	38	2.53672
2	(Dejnirattisai et al., 2008)	6	9				9	16	1.37694	14	0.934579
2	(Pandey et al. 2015)	30	21				10	23	1.97935	23	1.53538
2				103	87		11	17	1.46299	20	1.33511
3	(Kurane et al. 1993)	6	12				12	7	0.60241	10	0.667557
3	(Sharone Green et al. 1999)	15	17				13	1	0.0860585	4	0.267023
3	(S Green et al. 1999)	13	15				16	1	0.0860585	1	0.0667557
3	(Kittigul et al. 2000)	1	6
3	(Murgue, Cassar, and Deparis 2001)	34	3
3	(Butthep et al. 2006)	6	18
3	(Srikiatkhachorn et al. 2006)	22	23
3	(Dejnirattisai et al., 2008)	8	16
3	(Chunhakan et al. 2015)	7	11
3	(Pandey et al. 2015)	31	40
3	(Eppy et al. 2016)	20	24
3	(Fernando et al. 2016)	25	15
3				188	200
4	(Kurane et al. 1993)	5	20
4	(Sharone Green et al. 1999)	18	21
4	(S Green et al. 1999)	15	20
4	(Murgue, Cassar, and Deparis 2001)	35	10
4	(Butthep et al. 2006)	18	42
4	(Srikiatkhachorn et al. 2006)	22	23
4	(Dejnirattisai et al., 2008)	7	22
4	(Houghton-Trivino et al. 2009)	21	17
4	(Ubol et al. 2010)	15	15
4	(Chunhakan et al. 2015)	17	38
4	(Ferreira et al. 2015)	2	2
4	(Pandey et al. 2015)	24	38
4	(Fernando et al. 2016)	25	15
4	(Kamaladasa et al. 2016)	11	25
4				235	308
4.5	(Kamaladasa et al. 2016)	11	25
4.5				11	25
5	(Kurane et al. 1993)	4	22
5	(Sharone Green et al. 1999)	20	22
5	(S Green et al. 1999)	20	18
5	(Murgue, Cassar, and Deparis 2001)	33	10
5	(Butthep et al. 2006)	22	62
5	(Khongphatthanayothin, Phumaphuti, Thongchaiprasit, & Poovorawan, 2006)	11	16
5	(Srikiatkhachorn et al. 2006)	22	23
5	(Dejnirattisai et al., 2008)	12	30
5	(Chunhakan et al. 2015)	36	65
5	(Ferreira et al. 2015)	9	8
5	(Pandey et al. 2015)	5	22
5	(Fernando et al. 2016)	25	15
5	(Kamaladasa et al. 2016)	11	25
5				230	338
5.5	(Kamaladasa et al. 2016)	11	25
5.5				11	25
6	(Sharone Green et al. 1999)	16	14
6	(S Green et al. 1999)	19	12
6	(Kittigul et al. 2000)	1	0
6	(Murgue, Cassar, and Deparis 2001)	23	8
6	(Perez et al. 2004)	23	5
6	(Butthep et al. 2006)	16	64
6	(Srikiatkhachorn et al. 2006)	22	23
6	(Dejnirattisai et al., 2008)	10	31
6	(Chunhakan et al. 2015)	30	67
6	(Ferreira et al. 2015)	3	8
6	(Fernando et al. 2016)	8	6
6	(Kamaladasa et al. 2016)	11	25
6				182	263
6.5	(Kamaladasa et al. 2016)	11	25
6.5				11	25
7	(Murgue, Cassar, and Deparis 2001)	14	4
7	(Butthep et al. 2006)	6	33
7	(Chunhakan et al. 2015)	10	19
7	(Ferreira et al. 2015)	23	29
7	(Fernando et al. 2016)	8	6
7	(Kamaladasa et al. 2016)	11	25
7				72	116
8	(Murgue, Cassar, and Deparis 2001)	10	5
8	(Ferreira et al. 2015)	21	27
8	(Fernando et al. 2016)	8	6
8				39	38
9	(Ferreira et al. 2015)	16	14
9				16	14
10	(Ferreira et al. 2015)	23	23
10				23	23
11	(Ferreira et al. 2015)	17	20
11				17	20
12	(Ferreira et al. 2015)	7	10
12				7	10
13	(Ferreira et al. 2015)	1	4
13				1	4
16	(Ferreira et al. 2015)	1	1
16				1	1

## Sheet: 10- mechanism
Table 1. Subgroup analyses of different levels of severity
Biomarkers	1- Significant difference between different levels of severity in 1997 and 2009 WHO classification? (general)						2- Significant difference between different levels of severity in 1997 and 2009 WHO classification? (detail)								3- Significant difference between control and severe dengue infections?
	1997			2009			1997				2009				1997	2009	Significant difference
	Control vs DF	DF vs DHF/DSS	Correlate	Control vs DF	DF vs SD	Correlate	Control vs DF	DF vs DHF	DHF vs DSS	Correlate	control vs Dfwows	Dfwows vs DFwws	DFwws vs SD	Correlate	Control vs DHF/DSS	Control vs SD
MCP-1	yes	no	no	no	no	no	yes	insuff.	insuff.	insuff.	-	-	-	insuff.	yes	no	no
MIP-1b	yes	yes	yes	insuff.	insuff.	insuff.	yes	-	-	insuff.	-	-	-	insuff.	yes	insuff.	no
RANTES	no	-	insuff.	no	yes	no	no	-	-	insuff.	-	-	-	insuff.	no	no	no
Eotaxin-1	no	-	insuff.	insuff.	insuff.	insuff.	no	-	-	insuff.	-	-	-	insuff.	no	insuff.	no
C-TACK	no	-	insuff.	-	-	insuff.	no	-	-	insuff.	-	-	-	insuff.	no	-	no
CXCL9	-	insuff.	insuff.	-	-	insuff.	-	-	-	insuff.	-	-	-	insuff.	-	-	no
CXCL10	yes	no	no	yes	no	no	yes	-	-	insuff.	-	-	-	insuff.	yes	yes	yes
CXCL11	-	insuff.	insuff.	-	-	insuff.	-	-	-	insuff.	-	-	-	insuff.	-	-	no
SDF-1	no	-	insuff.	-	-	insuff.	no	-	-	insuff.	-	-	-	insuff.	no	-	no
IL-1a	no	-	insuff.	yes	no	no	no	-	-	insuff.	-	-	-	insuff.	no	yes	no
IL-1b	no	no	no	insuff.	insuff.	insuff.	no	no	no	no	insuff.	insuff.	insuff.	insuff.	no	insuff.	no
IL-1ra	no	-	insuff.	no	no	no	no	-	-	insuff.	-	-	-	insuff.	no	no	no
IL-2	yes	yes	yes	-	-	insuff.	yes	yes	no	no	-	-	-	insuff.	yes	-	no
IL-2r	yes	no	no	-	-	insuff.	yes	yes	no	no	-	-	-	insuff.	yes	-	no
IL-3	yes	-	insuff.	-	-	insuff.	yes	-	-	insuff.	-	-	-	insuff.	yes	-	no
IL-4	insuff.	no	insuff.	-	-	insuff.	insuff.	insuff.	no	insuff.	-	-	-	insuff.	insuff.	-	no
IL-6	yes	no	no	no	yes	no	yes	insuff.	insuff.	insuff.	no	no	no	no	yes	no	no
IL-7	no	-	insuff.	-	yes	insuff.	no	-	-	insuff.	-	-	-	insuff.	no	-	no
IL-8	no	no	no	no	yes	no	no	insuff.	-	insuff.	no	yes	yes	no	no	no	no
IL-9	insuff.	insuff.	insuff.	-	-	insuff.	insuff.	insuff.	insuff.	insuff.	-	-	-	insuff.	insuff.	-	no
IL-10	yes	yes	yes	yes	yes	yes	yes	no	no	no	yes	no	no	no	yes	yes	yes
IL-12	no	no	no	insuff.	insuff.	insuff.	no	-	insuff.	insuff.	insuff.	insuff.	insuff.	insuff.	no	insuff.	no
IL-13	yes	no	no	-	-	insuff.	yes	-	-	insuff.	-	-	-	insuff.	yes	-	no
IL-15	-	-	insuff.	-	-	insuff.	-	-	-	insuff.	-	-	-	insuff.	-	-	no
IL-16	yes	-	insuff.	-	-	insuff.	yes	-	-	insuff.	-	-	-	insuff.	yes	-	no
IL-17	no	no	no	no	yes	no	no	insuff.	insuff.	insuff.	insuff.	insuff.	insuff.	insuff.	no	no	no
IL-18	insuff.	yes	insuff.	insuff.	insuff.	insuff.	insuff.	-	-	insuff.	-	-	-	insuff.	insuff.	insuff.	no
IL-18BP	-	-	insuff.	insuff.	insuff.	insuff.	-	-	-	insuff.	-	-	-	insuff.	-	insuff.	no
IL-18FP	-	-	insuff.	insuff.	insuff.	insuff.	-	-	-	insuff.	-	-	-	insuff.	-	insuff.	no
IL-21	yes	no	no	-	-	insuff.	yes	-	-	insuff.	-	-	-	insuff.	yes	-	no
IL-33	-	-	insuff.	insuff.	insuff.	insuff.	-	-	-	insuff.	insuff.	insuff.	insuff.	insuff.	-	insuff.	no
TNF-a	yes	yes	yes	yes	no	no	yes	no	no	no	no	no	no	no	yes	yes	yes
TNF-b	yes	-	insuff.	-	-	insuff.	yes	-	-	insuff.	-	-	-	insuff.	yes	-	no
sTNF-R1	yes	no	no	insuff.	insuff.	insuff.	yes	-	-	insuff.	insuff.	insuff.	insuff.	insuff.	yes	insuff.	no
sTNF-R2	yes	no	no	insuff.	insuff.	insuff.	yes	-	-	insuff.	insuff.	insuff.	insuff.	insuff.	yes	insuff.	no
MIF	no	no	no	insuff.	insuff.	insuff.	no	-	-	insuff.	-	-	-	insuff.	no	insuff.	no
TGF-b	-	no	insuff.	no	no	no	-	-	-	insuff.	no	no	no	no	-	no	no
sST2	no	yes	no	no	no	no	no	no	yes	no	no	no	no	no	no	no	no
E-selectin	insuff.	insuff.	insuff.	-	-	insuff.	insuff.	-	-	insuff.	-	-	-	insuff.	insuff.	-	no
L-Selectin	yes	yes	yes	-	-	insuff.	yes	-	-	insuff.	-	-	-	insuff.	yes	-	no
P-Selectin	no	yes	no	-	-	insuff.	no	-	-	insuff.	-	-	-	insuff.	no	-	no
VEGF	no	no	no	yes	no	no	no	no	yes	no	insuff.	insuff.	-	insuff.	no	yes	no
VEGFR1	insuff.	yes	insuff.	-	-	insuff.	insuff.	insuff.	insuff.	insuff.	-	-	-	insuff.	insuff.	-	no
VEGFR2	insuff.	yes	insuff.	insuff.	insuff.	insuff.	insuff.	insuff.	insuff.	insuff.	insuff.	insuff.	-	insuff.	insuff.	insuff.	no
VEGFR2 bound	-	yes	no	-	-	insuff.	-	-	-	insuff.	-	-	-	insuff.	-	-	no
sVCAM-1	yes	no	no	yes	no	no	yes	no	no	no	-	-	-	insuff.	yes	yes	yes
sICAM-1	no	no	no	no	no	no	no	-	-	insuff.	-	-	-	insuff.	no	no	no
IFN-a2	no	yes	no	no	no	no	no	yes	yes	no	-	-	-	insuff.	no	no	no
IFN-b	-	no	insuff.	-	-	insuff.	-	-	-	insuff.	-	-	-	insuff.	-	-	no
IFN-g	yes	no	no	no	yes	no	yes	yes	yes	yes	no	yes	yes	no	yes	no	no
sTRAIL	-	-	insuff.	no	no	no	-	-	-	insuff.	no	no	no	no	-	no	no
MMP-2	-	-	insuff.	insuff.	insuff.	insuff.	-	-	-	insuff.	insuff.	insuff.	-	insuff.	-	insuff.	no
MMP-9	insuff.	insuff.	insuff.	insuff.	-	insuff.	insuff.	-	-	insuff.	insuff.	insuff.	-	insuff.	insuff.	insuff.	no
Table 2. Mean difference in viremia between DF and severe dengue infections patients
Viral load	Total	mean difference	combined std	Day	Study name	DF			SDI
						n	mean	std	n	mean	std							Rate of viremia clearance
viral load	54	5.28554e+07	1.91534e+07	2	(Libraty et al. 2002)	25	3.89061e+07	3.23605e+07	29	9.17614e+07	9.70772e+07				yes			DF	SDI
viral load	54	2.71641e+07	6.36643e+06	3	(Libraty et al. 2002)	25	2.31247e+07	2.62363e+07	29	5.02888e+07	1.94147e+07				yes
viral load	54	2.26871e+07	3.02278e+06	4	(Libraty et al. 2002)	25	7.34542e+06	5.08342e+06	29	3.00325e+07	1.53298e+07				yes
viral load	54	1.10094e+06	207448	5	(Libraty et al. 2002)	25	285088	334040	29	1.38603e+06	1.05763e+06				yes			-1.57803e+07	-3.08644e+07
viral load	54	38542.7	9970.4	6	(Libraty et al. 2002)	25	28809.7	31496.7	29	67352.3	41618.4				yes
viral load	54	2215.78	1531.79	7	(Libraty et al. 2002)	25	16347.5	6943.85	29	18563.3	3480.42				yes
viral load	139	-7.79364e+08	6.69972e+08	2-9	(Singla et al. 2016)	75	9.36208e+08	5.77341e+09	64	1.56844e+08	5.32606e+08
viral load	99	167.885	53.5988	1-2	(chen et al. 2005)	66	246.716	93.4313	33	414.601	300.731				yes
viral load	99	160.584	12.2061	3-4	(chen et al. 2005)	66	86.1321	20.4388	33	246.716	68.6134				yes
viral load	99	-27.738	4.5532	5-7	(chen et al. 2005)	66	64.2343	29.197	33	36.4963	16.0596							-64.2334	-67.154
viral load					DF	423	144.914	38.502				Random	0	98.26		69.451	220.376
viral load					SDI				337	1517.53	190.25	Random	0	99.447		1144.65	1890.41
viral load	760	475.292	83.486		SDI vs DF							Random	0	99.969	1.53322e-12	311.662	638.922
Table 3. Mean difference in viremia between primary and secondary infections patients
Viral load	Total	mean difference	combined std	Day	Study name	primary			secondary
						n	mean	std	n	mean	std
viral load	11	-2.416e+08	1.87969e+08	2	(Singla et al. 2016)	10	2.41614e+08	5.9441e+08	1	13793.5								primary	secondary
viral load	20	4.25911e+07	2.95364e+08	3	(Singla et al. 2016)	13	2.3755e+08	6.16674e+08	7	2.80141e+08	6.37109e+08				yes
viral load	25	1.67935e+08	2.68468e+08	4	(Singla et al. 2016)	11	1.12749e+08	3.73826e+08	14	2.80684e+08	9.11699e+08				yes
viral load	24	1.55538e+09	1.27905e+09	5	(Singla et al. 2016)	2	369670	503285	22	1.55575e+09	5.99926e+09				yes			-6.44328e+07	-7.7634e+08
viral load	27	4.53486e+07	3.30748e+07	6	(Singla et al. 2016)	5	563795	777157	22	4.59124e+07	1.55126e+08				yes
viral load	12	3.05821e+06	2.01122e+06	7	(Singla et al. 2016)	4	10417.1	16133.1	8	3.06863e+06	5.68855e+06				yes
viral load	11	1.05824e+06	1.18406e+06	8	(Singla et al. 2016)	2	500422	707244	9	1.55866e+06	3.2198e+06				yes
viral load	6	770792	770523	9	(Singla et al. 2016)	2	129.16	0	4	770921	1.54105e+06				yes
viral load	100	234.452	635.936	1	(Sung et al. 2016)	50	12305.6	2839.25	50	12540	3487.03				yes
viral load	100	-1371.17	392.194	2	(Sung et al. 2016)	50	7972.26	1839.43	50	6601.1	2075.41
viral load	100	-1896.19	112.84	3	(Sung et al. 2016)	50	2823.39	717.64	50	927.201	348.759							-4741.1	-5806.42
viral load	100	-432.591	25.7131	4	(Sung et al. 2016)	50	578.442	174.934	50	145.852	49.5603
viral load	100	-65.4764	4.59062	5	(Sung et al. 2016)	50	109.891	30.5576	50	44.4148	10.9507
viral load	100	-1.28699	0.585745	7	(Sung et al. 2016)	50	23.38		50	22.093	4.14185
viral load					primary	349	4477.49	421.701				Random	0	99.62		3650.97	5304.01
viral load					secondary				387	285.134	26.948	Random	0	99.39		232.317	337.952
viral load	736	-612.375	38.15		secondary vs primary							Random	0	99.983	0	-687.149	-537.601

[truncated: 1 more sheets: 11-literature]
